# Supplementary material for: Tandem Hock and Friedel–Crafts reactions allowing an expedient synthesis of a cyclolignan-type scaffold
Source: publisher site journal article supplement (doi:10.3762/bjoc.20.15), 2024-01-25

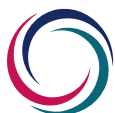

## Supporting Information

for

### **Tandem Hock and Friedel–Crafts reactions allowing an expedient synthesis of a cyclolignan-type scaffold**

Viktorija A. Ikonnikova, Cristina Cheibas, Oscar Gayraud, Alexandra E. Bosnidou, Nicolas Casaretto, Gilles Frison and Bastien Nay

*Beilstein J. Org. Chem.* **2024**, *20*, 162–169. [doi:10.3762/bjoc.20.15](https://doi.org/10.3762/bjoc.20.15)

**Experimental procedures, compound characterizations, crystallographic data, DFT calculation, and spectra**

# Content

|                                                                                                                   |           |
|-------------------------------------------------------------------------------------------------------------------|-----------|
| <b>General information</b>                                                                                        | <b>S3</b> |
| <b>Experimental procedures and compound characterization</b>                                                      | <b>S4</b> |
| <b>General procedure A for other (3-methylbut-2-enyl)malonate (S1) benzylation</b>                                | S4        |
| <b>General procedure B for the one-pot transformation</b>                                                         | S4        |
| Diethyl (3-methylbut-2-enyl)malonate ( <b>S1</b> )                                                                | S4        |
| Diethyl benzyl(3-methylbut-2-enyl)malonate ( <b>1</b> )                                                           | S5        |
| Diethyl benzyl(2-oxoethyl)malonate ( <b>3</b> )                                                                   | S6        |
| Diethyl (1 <i>H</i> )naphthalene-2,2-dicarboxylate ( <b>4</b> )                                                   | S6        |
| 3,3-Bis(ethoxycarbonyl)-1-(2,4,6-trimethoxyphenyl)-1,2,3,4-tetrahydronaphthalene ( <b>6</b> )                     | S7        |
| Diethyl (2-methylbenzyl)(3-methylbut-2-enyl)malonate ( <b>11a</b> )                                               | S7        |
| Diethyl (2-fluorobenzyl)(3-methylbut-2-enyl)malonate ( <b>11b</b> )                                               | S8        |
| Diethyl (2-chlorobenzyl)(3-methylbut-2-enyl)malonate ( <b>11c</b> )                                               | S8        |
| Diethyl (2-methoxybenzyl)(3-methylbut-2-enyl)malonate ( <b>11d</b> )                                              | S9        |
| Diethyl (3-methylbenzyl)(3-methylbut-2-enyl)malonate ( <b>11e</b> )                                               | S9        |
| Diethyl (3-fluorobenzyl)(3-methylbut-2-enyl)malonate ( <b>11f</b> )                                               | S10       |
| Diethyl (3-chlorobenzyl)(3-methylbut-2-enyl)malonate ( <b>11g</b> )                                               | S10       |
| Diethyl (3-bromobenzyl)(3-methylbut-2-enyl)malonate ( <b>11h</b> )                                                | S11       |
| Diethyl (3-methoxybenzyl)(3-methylbut-2-enyl)malonate ( <b>11i</b> )                                              | S11       |
| Diethyl (4-bromobenzyl)(3-methylbut-2-enyl)malonate ( <b>11j</b> )                                                | S11       |
| Diethyl (4-methoxycarbonylbenzyl)(3-methylbut-2-enyl)malonate ( <b>11k</b> )                                      | S12       |
| Diethyl (3-cyanobenzyl)(3-methylbut-2-enyl)malonate ( <b>11l</b> )                                                | S12       |
| Diethyl (4-cyanobenzyl)(3-methylbut-2-enyl)malonate ( <b>11m</b> )                                                | S13       |
| Diethyl (4-nitrobenzyl)(3-methylbut-2-enyl)malonate ( <b>11n</b> )                                                | S13       |
| 3,3-Bis(ethoxycarbonyl)-5-methyl-1-(2,4,6-trimethoxyphenyl)-1,2,3,4-tetrahydronaphthalene ( <b>12a</b> )          | S14       |
| 3,3-Bis(ethoxycarbonyl)-5-fluoro-1-(2,4,6-trimethoxyphenyl)-1,2,3,4-tetrahydronaphthalene ( <b>12b</b> )          | S14       |
| 3,3-Bis(ethoxycarbonyl)-5-chloro-1-(2,4,6-trimethoxyphenyl)-1,2,3,4-tetrahydronaphthalene ( <b>12c</b> )          | S15       |
| 3,3-Bis(ethoxycarbonyl)-5-methoxy-1-(2,4,6-trimethoxyphenyl)-1,2,3,4-tetrahydronaphthalene ( <b>12d</b> )         | S16       |
| 3,3-Bis(ethoxycarbonyl)-6-methyl-1-(2,4,6-trimethoxyphenyl)-1,2,3,4-tetrahydronaphthalene ( <b>12e</b> )          | S16       |
| 3,3-Bis(ethoxycarbonyl)-6-fluoro-1-(2,4,6-trimethoxyphenyl)-1,2,3,4-tetrahydronaphthalene ( <b>12f</b> )          | S17       |
| 3,3-Bis(ethoxycarbonyl)-6-chloro-1-(2,4,6-trimethoxyphenyl)-1,2,3,4-tetrahydronaphthalene ( <b>12g</b> )          | S18       |
| 3,3-Bis(ethoxycarbonyl)-6-bromo-1-(2,4,6-trimethoxyphenyl)-1,2,3,4-tetrahydronaphthalene ( <b>12h</b> )           | S18       |
| 3,3-Bis(ethoxycarbonyl)-6-methoxy-1-(2,4,6-trimethoxyphenyl)-1,2,3,4-tetrahydronaphthalene ( <b>12i</b> )         | S19       |
| 3,3-Bis(ethoxycarbonyl)-7-bromo-1-(2,4,6-trimethoxyphenyl)-1,2,3,4-tetrahydronaphthalene ( <b>12j</b> )           | S20       |
| 3,3-Bis(ethoxycarbonyl)-7-methoxycarbonyl-1-(2,4,6-trimethoxyphenyl)-1,2,3,4-tetrahydronaphthalene ( <b>12k</b> ) | S20       |
| 2-[3,3-Bis(ethoxycarbonyl)-4-(4-cyanophenyl)-1-buten-1-yl]-1,3,5-trimethoxybenzene ( <b>13m</b> )                 | S21       |
| 2-[3,3-Bis(ethoxycarbonyl)-4-(4-nitrophenyl)-1-buten-1-yl]-1,3,5-trimethoxybenzene ( <b>13n</b> )                 | S22       |
| 3,3-Bis(ethoxycarbonyl)-1-(2,4-dimethoxyphenyl)-1,2,3,4-tetrahydronaphthalene ( <b>14</b> )                       | S22       |

|                                                                                                                                                                                                                    |            |
|--------------------------------------------------------------------------------------------------------------------------------------------------------------------------------------------------------------------|------------|
| 3,3-Bis(ethoxycarbonyl)-1-(3,4,5-trimethoxyphenyl)-1,2,3,4-tetrahydronaphthalene (15)                                                                                                                              | S23        |
| Diethyl (3-methylbut-2-enyl)(phenyl)malonate (16)                                                                                                                                                                  | S23        |
| 3,3-Bis(ethoxycarbonyl)-1-(2,4,6-trimethoxyphenyl)-1,2-dihydroindene (17)                                                                                                                                          | S24        |
| <b>Crystal structure determination of 6</b>                                                                                                                                                                        | <b>S25</b> |
| Experimental                                                                                                                                                                                                       | S25        |
| Crystal Data                                                                                                                                                                                                       | S25        |
| <b>DFT calculation</b>                                                                                                                                                                                             | <b>S31</b> |
| Cartesian coordinates of the optimized geometries and associated energies and free energy corrections obtained at the IEFPCM(CH <sub>2</sub> Cl <sub>2</sub> )-M06/6-311++G(2d,2p)//M06/6-31G(d,p) level of theory | S31        |
| Structure 7 .....                                                                                                                                                                                                  | S31        |
| Structure 7' .....                                                                                                                                                                                                 | S32        |
| Transition state (TS).....                                                                                                                                                                                         | S34        |
| <b>References</b>                                                                                                                                                                                                  | <b>S36</b> |
| <b>Copies of spectra</b>                                                                                                                                                                                           | <b>S37</b> |
| Diethyl (3-methylbut-2-enyl)malonate (S1)                                                                                                                                                                          | S37        |
| Diethyl benzyl(3-methylbut-2-enyl)malonate (1)                                                                                                                                                                     | S38        |
| Diethyl (1 <i>H</i> )naphthalene-2,2-dicarboxylate (4)                                                                                                                                                             | S39        |
| 3,3-Bis(ethoxycarbonyl)-1-(2,4,6-trimethoxyphenyl)-1,2,3,4-tetrahydronaphthalene (6)                                                                                                                               | S40        |
| Diethyl (2-methylbenzyl)(3-methylbut-2-enyl)malonate (11a)                                                                                                                                                         | S41        |
| Diethyl (2-fluorobenzyl)(3-methylbut-2-enyl)malonate (11b)                                                                                                                                                         | S42        |
| Diethyl (2-chlorobenzyl)(3-methylbut-2-enyl)malonate (11c)                                                                                                                                                         | S43        |
| Diethyl (2-methoxybenzyl)(3-methylbut-2-enyl)malonate (11d)                                                                                                                                                        | S44        |
| Diethyl (3-methylbenzyl)(3-methylbut-2-enyl)malonate (11e)                                                                                                                                                         | S45        |
| Diethyl (3-fluorobenzyl)(3-methylbut-2-enyl)malonate (11f)                                                                                                                                                         | S46        |
| Diethyl (3-chlorobenzyl)(3-methylbut-2-enyl)malonate (11g)                                                                                                                                                         | S47        |
| Diethyl (3-bromobenzyl)(3-methylbut-2-enyl)malonate (11h)                                                                                                                                                          | S48        |
| Diethyl (3-methoxybenzyl)(3-methylbut-2-enyl)malonate (11i)                                                                                                                                                        | S49        |
| Diethyl (4-bromobenzyl)(3-methylbut-2-enyl)malonate (11j)                                                                                                                                                          | S50        |
| Diethyl (4-methoxycarbonylbenzyl)(3-methylbut-2-enyl)malonate (11k)                                                                                                                                                | S51        |
| Diethyl (3-cyanobenzyl)(3-methylbut-2-enyl)malonate (11l)                                                                                                                                                          | S52        |
| Diethyl (4-cyanobenzyl)(3-methylbut-2-enyl)malonate (11m)                                                                                                                                                          | S53        |
| Diethyl (4-nitrobenzyl)(3-methylbut-2-enyl)malonate (11n)                                                                                                                                                          | S54        |
| 3,3-Bis(ethoxycarbonyl)-5-methyl-1-(2,4,6-trimethoxyphenyl)-1,2,3,4-tetrahydronaphthalene (12a)                                                                                                                    | S55        |
| 3,3-Bis(ethoxycarbonyl)-5-fluoro-1-(2,4,6-trimethoxyphenyl)-1,2,3,4-tetrahydronaphthalene (12b)                                                                                                                    | S56        |
| 3,3-Bis(ethoxycarbonyl)-5-chloro-1-(2,4,6-trimethoxyphenyl)-1,2,3,4-tetrahydronaphthalene (12c)                                                                                                                    | S57        |
| 3,3-Bis(ethoxycarbonyl)-5-methoxy-1-(2,4,6-trimethoxyphenyl)-1,2,3,4-tetrahydronaphthalene (12d)                                                                                                                   | S58        |
| 3,3-Bis(ethoxycarbonyl)-6-methyl-1-(2,4,6-trimethoxyphenyl)-1,2,3,4-tetrahydronaphthalene (12e)                                                                                                                    | S59        |
| 3,3-Bis(ethoxycarbonyl)-6-fluoro-1-(2,4,6-trimethoxyphenyl)-1,2,3,4-tetrahydronaphthalene (12f)                                                                                                                    | S60        |
| 3,3-Bis(ethoxycarbonyl)-6-chloro-1-(2,4,6-trimethoxyphenyl)-1,2,3,4-tetrahydronaphthalene (12g)                                                                                                                    | S61        |
| 3,3-Bis(ethoxycarbonyl)-6-bromo-1-(2,4,6-trimethoxyphenyl)-1,2,3,4-tetrahydronaphthalene (12h)                                                                                                                     | S62        |
| 3,3-Bis(ethoxycarbonyl)-6-methoxy-1-(2,4,6-trimethoxyphenyl)-1,2,3,4-tetrahydronaphthalene (12i)                                                                                                                   | S63        |
| 3,3-Bis(ethoxycarbonyl)-7-bromo-1-(2,4,6-trimethoxyphenyl)-1,2,3,4-tetrahydronaphthalene (12j)                                                                                                                     | S64        |
| 3,3-Bis(ethoxycarbonyl)-7-methoxy-1-(2,4,6-trimethoxyphenyl)-1,2,3,4-tetrahydronaphthalene (12k)                                                                                                                   | S65        |

|                                                                                                   |     |
|---------------------------------------------------------------------------------------------------|-----|
| 2-[3,3-Bis(ethoxycarbonyl)-4-(4-cyanophenyl)-1-buten-1-yl]-1,3,5-trimethoxybenzene ( <b>13m</b> ) | S66 |
| 2-[3,3-Bis(ethoxycarbonyl)-4-(4-nitrophenyl)-1-buten-1-yl]-1,3,5-trimethoxybenzene ( <b>13n</b> ) | S67 |
| 3,3-Bis(ethoxycarbonyl)-1-(2,4-dimethoxyphenyl)-1,2,3,4-tetrahydronaphthalene ( <b>14</b> )       | S68 |
| 3,3-Bis(ethoxycarbonyl)-1-(3,4,5-trimethoxyphenyl)-1,2,3,4-tetrahydronaphthalene ( <b>15</b> )    | S69 |
| Diethyl (3-methylbut-2-enyl)(phenyl)malonate ( <b>16</b> )                                        | S70 |
| 3,3-Bis(ethoxycarbonyl)-1-(2,4,6-trimethoxyphenyl)-1,2-dihydroindene ( <b>17</b> )                | S71 |

## General information

Reactions were conducted under a positive pressure of dry argon (except photooxygenation reactions that used oxygen). Anhydrous solvents were obtained from commercial sources. Commercially available chemicals were used without further purification.

Analytical TLC was performed with Merck silica gel plates, pre-coated with silica gel 60 F<sub>254</sub> (0.2 mm). The visualization was effected by quenching of UV fluorescence ( $\lambda_{\text{max}} = 254 \text{ nm}$  or  $360 \text{ nm}$ ) and by staining with potassium permanganate or vanillin TLC stain solutions, followed by heating with a heat gun. Flash column chromatography was performed with silica gel (type 60, 40–63  $\mu\text{m}$ ).

Melting points were measured on a Stuart SMP3 melting point apparatus.

The NMR spectra were recorded at 298 K using a Bruker AVANCE 400 spectrometer. <sup>1</sup>H NMR spectra were recorded at 400 MHz and residual solvent peaks were used as an internal reference (CDCl<sub>3</sub>  $\delta = 7.26 \text{ ppm}$ ). Data are reported as follows: chemical shift in ppm, apparent multiplicity (s = singlet, d = doublet, dd = doublet of doublet, t = triplet, m = multiplet or overlap of nonequivalent resonances), coupling constants, proton integration. Proton-decoupled <sup>13</sup>C NMR spectra (mentioned as <sup>13</sup>C{<sup>1</sup>H}) were recorded at 100 MHz and residual solvent peaks were used as an internal reference (CDCl<sub>3</sub>  $\delta = 77.0 \text{ ppm}$ ). Data are reported as follows: chemical shift in ppm (apparent multiplicity, coupling constants and integration when relevant).

Infrared spectra were recorded on a Perkin Elmer FT 1600 spectrometer with wavelengths in  $\text{cm}^{-1}$ .

High-resolution mass spectrometry (HRMS) experiments were performed on a Tims-TOF mass spectrometer (Bruker, France) using an electrospray ionization (ESI) source in the positive mode. All compounds were dissolved in CH<sub>3</sub>CN then diluted by CH<sub>3</sub>OH to obtained final concentration in the  $\mu\text{M}$  range. 10  $\mu\text{L}$  were introduced in the instrument without separation. The elemental compositions of all ions were determined with the instrument software Data Analysis, the precision of mass measurement was less than 5 ppm.

# Experimental procedures and compound characterization

## General procedure A for other (3-methylbut-2-enyl)malonate (S1) benzylation

To a solution of NaH 60% in THF (0.5 M) under argon was added diethyl (3-methylbut-2-enyl)malonate **S1** (1 equiv) at 0 °C, and the reaction mixture was stirred at room temperature until complete dissolution. Then the benzyl bromide of interest (1.2 equiv) was added at 0 °C and the reaction mixture was stirred at room temperature for ≈16 hours while being monitored by TLC. After completion, the reaction mixture was quenched with a saturated solution of NH<sub>4</sub>Cl. The mixture was extracted with EtOAc (3×), dried with Na<sub>2</sub>SO<sub>4</sub>, filtered and concentrated under reduced pressure. The crude mixture was purified by column chromatography to afford the pure product.

## General procedure B for the one-pot transformation

To a solution of disubstituted diethyl malonate substrates (1 equiv) in DCM (0.1 M) under oxygen was added methylene blue (0.05 equiv), and the reaction mixture was irradiated with white light (LED) at room temperature for 2–4 hours, while being monitored by TLC. Then MgSO<sub>4</sub> (1 equiv), BF<sub>3</sub>·OEt<sub>2</sub> (1 equiv) and the nucleophile (1.2 equiv) were added at 0 °C and the reaction mixture was stirred vigorously under argon for 3 hours while being monitored by TLC. After evaporation, the crude mixture was purified by flash column chromatography on silica gel to afford the pure product.

## Diethyl (3-methylbut-2-enyl)malonate (S1)

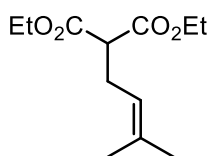

To a solution of NaH 60% (1.2 g, 30.0 mmol, 1.5 equiv) in THF (40 mL) under argon was slowly added diethyl malonate (6.1 mL, 40.0 mmol, 2 equiv) at 0 °C, and the reaction mixture was stirred at room temperature until complete dissolution. Then 3-methylbut-2-enyl bromide (technical 90%, 2.6 mL, 20.0 mmol, 1 equiv) was added at 0 °C and the reaction mixture was stirred vigorously at room temperature for ~16 hours while being monitored by TLC. After completion, the reaction mixture was quenched with a saturated solution of NH<sub>4</sub>Cl. The mixture was extracted with EtOAc (3×), dried with Na<sub>2</sub>SO<sub>4</sub>, filtered and concentrated under reduced

pressure. The crude mixture was purified by column chromatography (petroleum ether or PE/Et<sub>2</sub>O = 98:2 to 95:5) to afford pure product **S1** as a slightly colorless transparent oil (4.5 g, 98% yield).

The NMR data were in accordance with those reported in the literature.[1]

R<sub>f</sub> = 0.25 (PE/Et<sub>2</sub>O 9:1)

<sup>1</sup>H NMR (400 MHz, CDCl<sub>3</sub>): δ 5.09 – 5.04 (m, 1H), 4.18 (q, J = 7.1 Hz, 4H), 3.32 (t, J = 7.7 Hz, 1H), 2.60 – 2.56 (m, 2H), 1.68 – 1.67 (m, 3H), 1.63 (br s, 3H), 1.26 (t, J = 7.1 Hz, 6H).

<sup>13</sup>C{<sup>1</sup>H} NMR (100 MHz, CDCl<sub>3</sub>): δ 169.3, 135.0, 119.7, 61.3, 52.2, 27.6, 25.7, 17.8, 14.1.

## Diethyl benzyl(3-methylbut-2-enyl)malonate (**1**)

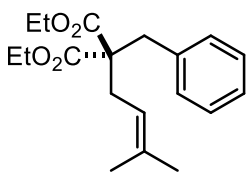

To a solution of NaH 60% (3 g, 77 mmol, 3.8 equiv) in THF (40 mL) under argon was slowly added commercial diethyl benzylmalonate (6.1 mL, 40.0 mmol, 2 equiv) at 0 °C, and the reaction mixture was stirred at room temperature until complete dissolution.[2] Then 3-methylbut-2-enyl bromide (technical 90%, 2.6 mL, 20.0 mmol, 1 equiv) was added at 0 °C and the reaction mixture was stirred vigorously at room temperature for ≈16 hours while being monitored by TLC. After completion, the reaction mixture was quenched with a saturated solution of NH<sub>4</sub>Cl. The mixture was extracted with EtOAc (3×), dried with Na<sub>2</sub>SO<sub>4</sub>, filtered and concentrated under reduced pressure. The crude mixture was purified by column chromatography (petroleum ether or PE/AcOEt = 99:1 to 95:5) to afford pure product **1** as a slightly colorless transparent oil (6.04 g, 95% yield).

R<sub>f</sub> = 0.43 (PE/EtOAc 95:5)

<sup>1</sup>H NMR (400 MHz, CDCl<sub>3</sub>): δ 7.26 – 7.20 (m, 3H), 7.08 – 7.06 (m, 2H), 5.13 – 5.08 (m, 1H), 4.19 – 4.14 (q, J = 7.2 Hz, 4H), 3.23 (s, 2H), 2.51 – 2.49 (m, 2H), 1.75 – 1.73 (m, 3H), 1.59 – 1.57 (m, 3H), 1.25 – 1.21 (m, 6H).

<sup>13</sup>C{<sup>1</sup>H} NMR (100 MHz, CDCl<sub>3</sub>): δ 171.3, 136.4, 135.5, 130.1, 128.3, 127.0, 118.0, 61.3, 59.0, 38.0, 30.6, 26.2, 18.3, 14.2.

HRMS (ESI+): calculated for C<sub>19</sub>H<sub>27</sub>O<sub>4</sub><sup>+</sup> [MH<sup>+</sup>]: 319.1904; found: 319.1904.

### Diethyl benzyl(2-oxoethyl)malonate (3)

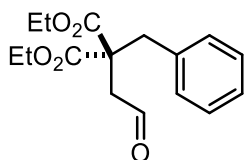

Compound **3** was occasionally observed during our screening our conditions for the tandem reaction and in crude mixtures. For characterization, it was better prepared by ozonolysis through the following procedure:

A solution of diethyl 2-(3-methylbut-2-en-1-yl)-2-phenylmalonate (**1**) (100 mg, 0.3 mmol, 1 equiv) in 1:1 DCM-MeOH (0.4 M) was stirred under a flow of O<sub>3</sub> for 5 min at rt. After completion of the reaction monitored by TLC, the reaction mixture was quenched with a solution of Me<sub>2</sub>S (50 μL, 0.68 mmol, 2.3 equiv) and extracted with ethyl acetate (3×). The combined organic layers were washed with a saturated aqueous solution of NaCl (2×) and NH<sub>4</sub>Cl (1×), dried over Na<sub>2</sub>SO<sub>4</sub>, filtered and concentrated under reduced pressure. The crude mixture was purified by column chromatography over silica gel (PE:EA gradient 95:5 to 9:1), to afford compound **3** as a transparent oil (50 mg, 0.17 mmol, yield 57%).

**<sup>1</sup>H NMR (400 MHz, CDCl<sub>3</sub>):** δ 9.66 (t, J = 1.3 Hz, 1H), 7.29 – 7.23 (m, 3H), 7.05 – 7.02 (m, 2H), 4.23 (q, J = 7.2 Hz, 4H), 3.38 (s, 2H), 2.86 (d, J = 1.3 Hz, 2H), 1.26 (t, J = 7.2 Hz, 6H).

**<sup>13</sup>C NMR (400 MHz, CDCl<sub>3</sub>):** δ 199.4, 170.1, 135.7, 130.1, 128.7, 127.5, 62.1, 56.1, 46.0, 39.4, 14.1.

**IR (ATR):**  $\tilde{\nu}$  2937, 1722, 1183, 1092, 703 cm<sup>-1</sup>.

### Diethyl (1*H*)naphthalene-2,2-dicarboxylate (4)

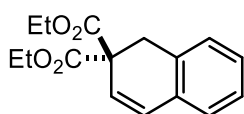

To a stirred solution of alkene **1** (64 mg, 0.23 mmol, 1 equiv) in DCM (2 mL) under oxygen was added MB (3.2 mg, 0.01 mmol, 0.05 equiv), and the reaction mixture was irradiated with white LED light at rt for 5 h while being monitored by TLC. Then, the oxygen atmosphere was purged with argon, and the reaction mixture was cooled down at 0 °C. BF<sub>3</sub>·OEt<sub>2</sub> (25 μL, 0.2 mmol, 1 equiv) and MgSO<sub>4</sub> (49 mg 0.4 mmol, 2 equiv) were added. The reaction mixture was vigorously stirred under argon at 0 °C for 1 h, then at reflux overnight. After concentration under vacuum, the residue was purified by flash chromatography over silica gel (PE:Et<sub>2</sub>O = 95:5) to afford compound **4** as transparent colorless oil (45 mg, 82%).

**<sup>1</sup>H NMR (400 MHz, CDCl<sub>3</sub>):** δ 7.18 – 7.15 (m, 3H), 7.08 – 7.05 (m, 1H), 6.64-6.61 (d, J = 9.6 Hz, 1H), 6.16-6.14 (d, J = 9.6 Hz, 1H), 4.22 – 4.14 (m, 4H), 3.41 (s, 2H), 1.24 – 1.21 (t, J = 7.1 Hz, 6H).

**<sup>13</sup>C NMR (400 MHz, CDCl<sub>3</sub>):** δ 170.2, 132.3, 131.7, 129.8, 128.2, 127.9, 127.1, 126.7, 124.7, 61.9, 55.0, 34.0, 14.1.

**IR (ATR):**  $\tilde{\nu}$  2982, 1730, 1225, 1185, 1104, 1047, 783, 700.

**HRMS (ESI+):** Calculated for C<sub>16</sub>H<sub>19</sub>O<sub>4</sub><sup>+</sup> [MH<sup>+</sup>]: 275.1278; found: 275.1278.

### 3,3-Bis(ethoxycarbonyl)-1-(2,4,6-trimethoxyphenyl)-1,2,3,4-tetrahydronaphthalene (6)

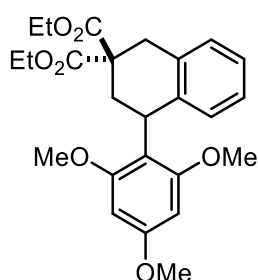

Synthesized by following general procedure B, from **1** (32 mg, 0.1 mmol) and 1,3,5-trimethoxybenzene (20 mg, 0.12 mmol). Purified over silica gel (PE:EA = 98:2 to 9:1) to afford product **6** as a white crystallin solid (38 mg, 0.086 mmol, 86% yield). Crystallisation performed from AcOEt for crystallography.

**M.p.** = 120-122 °C.

**<sup>1</sup>H NMR (400 MHz, CDCl<sub>3</sub>):** δ 7.07 (d, J = 7.3 Hz, 1H), 7.02 – 6.96 (m, 1H), 6.91 (t, J = 7.3 Hz, 1H), 6.70 (d, J = 7.3, 1H), 6.13 (br s, 2H), 4.81 (dd, J = 7.1, 11.3 Hz, 1H), 4.24 – 4.05 (m, 4H), 3.90 – 3.20 (overlapped signals, 11H: 3.80, s, 3H; 3.75, br s, 3H; 3.47, br s, 3H; 3.43, dd, J = 2.1, 15.7 Hz, 1H; 3.27, d, J = 15.7 Hz, 1H), 2.56 – 2.43 (m, 2H), 1.25 (t, J = 7.0 Hz, 3H), 1.17 (t, J = 7.0 Hz, 3H).

**<sup>13</sup>C{<sup>1</sup>H} NMR (100 MHz, CDCl<sub>3</sub>):** δ 172.0, 170.7, 159.7 (2C), 159.1, 139.6, 133.2, 128.0, 126.8, 125.8, 124.7, 114.5, 91.3 (broad, 2C), 61.3, 61.0, 55.7 (broad, 2C), 55.2, 54.6, 35.2, 33.2, 31.5, 14.0, 13.9.

**HRMS (ESI+):** calculated for C<sub>25</sub>H<sub>31</sub>O<sub>7</sub><sup>+</sup> [MH<sup>+</sup>]: 443.2064; found: 443.2065.

### Diethyl (2-methylbenzyl)(3-methylbut-2-enyl)malonate (11a)

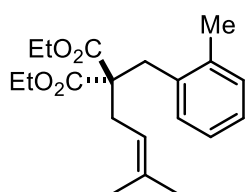



Synthesized through general procedure A from **S1** (457 mg, 2 mmol) and 2-methylbenzyl bromide (330  $\mu$ L, 2.4 mmol) to afford compound **11a** as a colorless oil (517 mg, 78%).

**$^1\text{H}$  NMR (400 MHz,  $\text{CDCl}_3$ ):**  $\delta$  7.11 – 7.06 (m, 4H), 5.11 – 5.06 (m, 1H), 4.20 – 4.06 (m, 4H), 3.30 (s, 2H), 2.58 (br d,  $J = 7.2$  Hz, 2H), 2.27 (s, 3H), 1.71 – 1.69 (m, 3H), 1.53 – 1.51 (m, 3H), 1.19 (t,  $J = 7.0$  Hz, 6H).

**$^{13}\text{C}\{^1\text{H}\}$  NMR (100 MHz,  $\text{CDCl}_3$ ):**  $\delta$  171.6, 137.3, 135.3, 135.0, 130.4, 130.0, 126.6, 125.6, 118.2, 61.2, 58.6, 34.2, 31.4, 26.0, 19.8, 18.0, 13.9.

**HRMS (ESI+):** Calculated for  $\text{C}_{20}\text{H}_{29}\text{O}_4^+$  [ $\text{MH}^+$ ]: 333.2060; found: 333.2057.

### Diethyl (2-fluorobenzyl)(3-methylbut-2-enyl)malonate (**11b**)

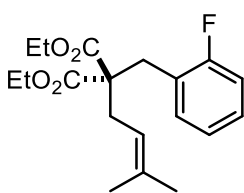

Synthesized through general procedure A from **S1** (228 mg, 1 mmol) and 2-fluorobenzyl iodide (237 mg, 1.2 mmol) to afford compound **11b** as a colorless oil (257 mg, 76% yield).

**$^1\text{H}$  NMR (400 MHz,  $\text{CDCl}_3$ ):**  $\delta$  7.22 – 7.14 (m, 1H), 7.14 – 7.07 (m, 1H), 7.04 – 6.92 (m, 2H), 5.12 (br t,  $J = 6.8$  Hz, 1H), 4.21 – 4.10 (m, 4H), 3.29 (s, 2H), 2.49 (br d,  $J = 7.1$  Hz, 2H), 1.71 (s, 3H), 1.56 (s, 3H), 1.22 (t,  $J = 7.1$  Hz, 6H).

**$^{13}\text{C}\{^1\text{H}\}$  NMR (100 MHz,  $\text{CDCl}_3$ ):**  $\delta$  171.1, 161.6 (d,  $J = 246.4$  Hz), 135.4, 132.3 (d,  $J = 4.4$  Hz), 128.7 (d = 8.5 Hz), 123.7 (d,  $J = 3.6$  Hz), 123.3 (d,  $J = 15.6$  Hz), 117.8, 115.2 (d,  $J = 22.1$  Hz), 61.2, 58.3, 31.2 (d,  $J = 2.0$  Hz), 30.8, 26.0, 18.0, 14.0.

**HRMS (ESI+):** Calculated for  $\text{C}_{19}\text{H}_{26}\text{FO}_4^+$  [ $\text{MH}^+$ ]: 337.1810; found: 337.1807.

### Diethyl (2-chlorobenzyl)(3-methylbut-2-enyl)malonate (**11c**)

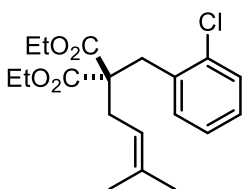

Synthesized through general procedure A from **S1** (228 mg, 1 mmol) and 2-chlorobenzyl iodide (303 mg, 1.2 mmol) to afford compound **11c** as a colorless oil (158 mg, 73% yield).

**<sup>1</sup>H NMR (400 MHz, CDCl<sub>3</sub>):** δ 7.33 – 7.29 (m, 1H), 7.24 – 7.20 (m, 1H), 7.16 – 7.11 (m, 2H), 5.16 – 5.10 (m, 1H), 4.21 – 4.08 (m, 4H), 3.44 (s, 2H), 2.60 – 2.55 (m, 2H), 1.72 – 1.69 (m, 3H), 1.57 – 1.55 (m, 3H), 1.19 (t, J = 7.1 Hz, 6H).

**<sup>13</sup>C{<sup>1</sup>H} NMR (100 MHz, CDCl<sub>3</sub>):** δ 171.1, 135.3, 135.2, 134.7, 131.8, 129.5, 128.1, 126.4, 118.1, 61.3, 58.5, 34.8, 31.5, 26.0, 18.0, 13.9.

**HRMS (ESI+):** Calculated for C<sub>19</sub>H<sub>26</sub>ClO<sub>4</sub><sup>+</sup> [MH<sup>+</sup>]: 353.1514; found: 353.1516.

### Diethyl (2-methoxybenzyl)(3-methylbut-2-enyl)malonate (11d)

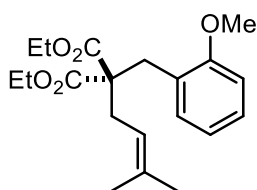

Synthesized through general procedure A from **S1** (228 mg, 1 mmol) and 2-methoxybenzyl bromide (241 mg, 1.2 mmol) to afford compound **11d** as a colorless oil (250 mg, 72% yield).

**<sup>1</sup>H NMR (400 MHz, CDCl<sub>3</sub>):** δ 7.18 (ddd, J = 1.8, 7.5, 8.2 Hz, 1H), 7.06 (dd, J = 1.8, 7.5 Hz, 1H), 6.85 – 6.78 (m, 2H), 5.21 – 5.15 (m, 1H), 4.21 – 4.08 (m, 4H), 3.73 (s, 3H), 3.32 (s, 2H), 2.47 – 2.43 (m, 2H), 1.72 – 1.70 (m, 3H), 1.56 – 1.54 (m, 3H), 1.22 (t, J = 7.2 Hz, 6H).

**<sup>13</sup>C{<sup>1</sup>H} NMR (100 MHz, CDCl<sub>3</sub>):** δ 171.5, 158.1, 134.6, 131.8, 128.1, 124.9, 120.2, 118.6, 110.1, 60.9, 58.4, 55.0, 31.9, 30.8, 26.1, 18.0, 14.0.

**HRMS (ESI+):** Calculated for C<sub>20</sub>H<sub>29</sub>O<sub>5</sub><sup>+</sup> [MH<sup>+</sup>]: 349.2010; found: 349.2009.

### Diethyl (3-methylbenzyl)(3-methylbut-2-enyl)malonate (11e)

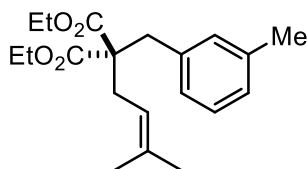

Synthesized through general procedure A from **S1** (457 mg, 2 mmol) and 3-methylbenzyl bromide (330 μL, 2.4 mmol) to afford compound **11e** as a colorless oil (664 mg, quantitative yield).

**<sup>1</sup>H NMR (400 MHz, CDCl<sub>3</sub>):** δ 7.14 – 7.10 (m, 1H), 7.03 – 6.99 (m, 1H), 6.88 – 6.84 (m, 2H), 5.12 – 5.07 (m, 1H), 4.17 (q, J = 7.0 Hz, 4H), 3.19 (s, 2H), 2.49 (br d, J = 7.0 Hz, 2H), 2.28 (s, 3H), 1.74 (br d, J = 1.3 Hz, 3H), 1.59 (br s, 3H), 1.24 (t, J = 7.0 Hz, 6H).

$^{13}\text{C}\{^1\text{H}\}$  NMR (100 MHz,  $\text{CDCl}_3$ ):  $\delta$  171.2, 137.6, 136.1, 135.2, 130.8, 128.0, 127.5, 126.9, 118.0, 61.1, 58.8, 37.7, 30.4, 26.1, 21.4, 18.1, 14.0.

HRMS (ESI+): Calculated for  $\text{C}_{20}\text{H}_{29}\text{O}_4^+$  [ $\text{MH}^+$ ]: 333.2060; found: 333.2056.

### Diethyl (3-fluorobenzyl)(3-methylbut-2-enyl)malonate (11f)

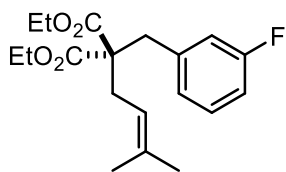

Synthesized through general procedure A from **S1** (228 mg, 1 mmol) and 3-fluorobenzyl bromide (160  $\mu\text{L}$ , 1.2 mmol) to afford compound **11f** as a colorless oil (288 mg, 86% yield).

$^1\text{H}$  NMR (400 MHz,  $\text{CDCl}_3$ ):  $\delta$  7.22 – 7.17 (m, 1H), 6.92 – 6.87 (m, 1H), 6.85 – 6.83 (m, 1H), 6.80 – 6.77 (m, 1H), 5.09 – 5.04 (m, 1H), 4.17 (dq,  $J = 0.8, 7.1$  Hz, 4H), 3.21 (s, 2H), 2.51 – 2.48 (m, 2H), 1.73 (m, 3H), 1.58 (m, 3H), 1.24 (t,  $J = 7.1$  Hz, 6H).

$^{13}\text{C}\{^1\text{H}\}$  NMR (100 MHz,  $\text{CDCl}_3$ ):  $\delta$  170.9, 162.5 (d,  $J = 245$  Hz), 138.8 (d,  $J = 7.2$  Hz), 135.6, 129.5 (d = 8.4 Hz), 125.6 (d,  $J = 2.9$  Hz), 117.5, 116.9 (d,  $J = 21.4$  Hz), 113.7 (d,  $J = 21.0$  Hz), 61.3, 58.7, 37.5 (d,  $J = 1.4$  Hz), 30.5, 26.0, 18.1, 14.0.

HRMS (ESI+): Calculated for  $\text{C}_{19}\text{H}_{26}\text{FO}_4^+$  [ $\text{MH}^+$ ]: 337.1810; found: 337.1805.

### Diethyl (3-chlorobenzyl)(3-methylbut-2-enyl)malonate (11g)

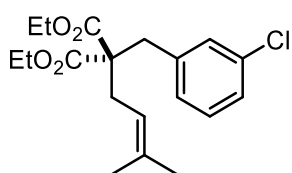

Synthesized through general procedure A from **S1** (228 mg, 1 mmol) and 3-chlorobenzyl bromide (160  $\mu\text{L}$ , 1.2 mmol) to afford compound **11g** as a colorless oil (316 mg, 89% yield).

$^1\text{H}$  NMR (400 MHz,  $\text{CDCl}_3$ ):  $\delta$  7.21 – 7.14 (m, 2H), 7.07 – 7.06 (m, 1H), 6.96 – 6.94 (m, 1H), 5.08 – 5.03 (m, 1H), 4.17 (q,  $J = 7.1$  Hz, 4H), 3.19 (s, 2H), 2.52 – 2.48 (m, 2H), 1.75 – 1.74 (m, 3H), 1.61 – 1.59 (m, 3H), 1.24 (t,  $J = 7.1$  Hz, 6H).

$^{13}\text{C}\{^1\text{H}\}$  NMR (100 MHz,  $\text{CDCl}_3$ ):  $\delta$  170.9, 138.3, 135.7, 133.9, 130.2, 129.4, 128.1, 127.0, 117.6, 61.3, 58.7, 37.5, 30.5, 26.0, 18.1, 14.0.

HRMS (ESI+): Calculated for  $\text{C}_{19}\text{H}_{26}\text{ClO}_4^+$  [ $\text{MH}^+$ ]: 353.1514; found: 353.1515.

## Diethyl (3-bromobenzyl)(3-methylbut-2-enyl)malonate (11h)

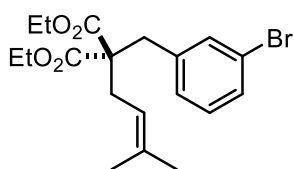

Synthesized through general procedure A from **S1** (228 mg, 1 mmol) and 3-bromobenzyl bromide (300 mg, 1.2 mmol) to afford compound **11h** as a colorless oil (332 mg, 84% yield).

**<sup>1</sup>H NMR (400 MHz, CDCl<sub>3</sub>):** δ 7.34 (ddd, J = 1.0, 2.1, 8.0 Hz, 1H), 7.22 (t, J = 1.8 Hz, 1H), 7.11 (t, J = 8.0 Hz, 1H), 7.01 – 6.98 (m, 1H), 5.07 – 5.01 (m, 1H), 4.17 (q, J = 7.1 Hz, 4H), 3.17 (s, 2H), 2.52 – 2.48 (m, 2H), 1.75 – 1.74 (m, 3H), 1.61 – 1.59 (m, 3H), 1.23 (t, J = 7.1 Hz, 6H).

**<sup>13</sup>C{<sup>1</sup>H} NMR (100 MHz, CDCl<sub>3</sub>):** δ 170.9, 138.7, 135.7, 133.1, 129.9, 129.7, 128.6, 122.2, 117.6, 61.3, 58.7, 37.5, 30.5, 26.0, 18.1, 14.0.

**HRMS (ESI+):** Calculated for C<sub>19</sub>H<sub>26</sub>BrO<sub>4</sub><sup>+</sup> [MH<sup>+</sup>]: 307.1009; found: 397.1010.

## Diethyl (3-methoxybenzyl)(3-methylbut-2-enyl)malonate (11i)

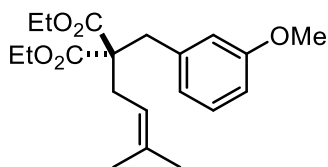

Synthesized through general procedure A from **S1** (114 mg, 0.5 mmol) and 3-methoxybenzyl chloride (87 μL, 0.6 mmol) to afford compound **11i** as a colorless oil (97 mg, 56% yield).

**<sup>1</sup>H NMR (400 MHz, CDCl<sub>3</sub>):** δ 7.17 – 7.13 (m, 1H), 6.76 – 6.73 (m, 1H), 6.67 – 6.62 (m, 2H), 5.12 – 5.07 (m, 1H), 4.17 (q, J = 7.2 Hz, 4H), 3.75 (s, 3H), 3.21 (s, 2H), 2.52 – 2.49 (m, 2H), 1.73 (m, 3H), 1.58 (m, 3H), 1.24 (t, J = 7.2 Hz, 6H).

**<sup>13</sup>C{<sup>1</sup>H} NMR (100 MHz, CDCl<sub>3</sub>):** δ 171.1, 159.4, 137.8, 135.3, 129.1, 122.4, 117.8, 116.0, 112.0, 61.2, 58.8, 55.1, 37.8, 30.4, 26.1, 18.1, 14.0.

**HRMS (ESI+):** Calculated for C<sub>20</sub>H<sub>29</sub>O<sub>5</sub><sup>+</sup> [MH<sup>+</sup>]: 349.2010; found: 349.2010.

## Diethyl (4-bromobenzyl)(3-methylbut-2-enyl)malonate (11j)

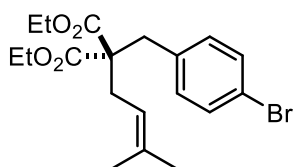

Synthesized through general procedure A from **S1** (228 mg, 1 mmol) and 4-bromobenzyl bromide (300 mg, 1.2 mmol) to afford compound **11j** as a colorless oil (301 mg, 76% yield).

**<sup>1</sup>H NMR (400 MHz, CDCl<sub>3</sub>):** δ 7.37 – 7.33 (m, 2H), 6.96 – 6.93 (m, 2H), 5.08 – 5.03 (m, 1H), 4.21 – 4.10 (m, 4H), 3.17 (s, 2H), 2.48 (d, J = 7.0 Hz, 2H), 1.74 – 1.71 (m, 3H), 1.58 (br s, 3H), 1.23 (dt, J = 0.4, 7.1 Hz, 6H).

**<sup>13</sup>C{<sup>1</sup>H} NMR (100 MHz, CDCl<sub>3</sub>):** δ 170.9, 135.6, 135.3, 131.7, 131.3, 120.9, 117.6, 61.3, 58.7, 37.3, 30.6, 26.0, 18.1, 14.0.

**HRMS (ESI+):** Calculated for C<sub>19</sub>H<sub>26</sub>BrO<sub>4</sub><sup>+</sup> [MH<sup>+</sup>]: 307.1009; found: 397.1016.

### Diethyl (4-methoxycarbonylbenzyl)(3-methylbut-2-enyl)malonate (**11k**)

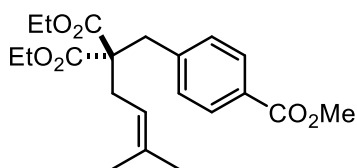

Synthesized through general procedure A from **S1** (210 mg, 0.92 mmol) and 4-(methoxycarbonyl)benzyl bromide (303 mg, 1.2 mmol) to afford compound **11k** as a colorless oil (282 mg, 90% yield).

**<sup>1</sup>H NMR (400 MHz, CDCl<sub>3</sub>):** δ 7.93 – 7.90 (m, 2H), 7.16 – 7.13 (m, 2H), 5.10 – 5.03 (m, 1H), 4.19 – 4.13 (m, 4H), 3.89 (s, 3H), 3.27 (s, 2H), 2.49 (d, J = 7.1 Hz, 2H), 1.75 – 1.73 (s, 3H), 1.59 – 1.56 (s, 3H), 1.22 (t, J = 7.2 Hz, 6H).

**<sup>13</sup>C{<sup>1</sup>H} NMR (100 MHz, CDCl<sub>3</sub>):** δ 170.9, 167.0, 141.9, 135.7, 130.0, 129.4, 128.7, 117.5, 61.3, 58.7, 52.0, 37.9, 30.6, 26.0, 18.1, 14.0.

**HRMS (ESI+):** Calculated for C<sub>21</sub>H<sub>29</sub>O<sub>6</sub><sup>+</sup> [MH<sup>+</sup>]: 377.1959; found: 377.1953.

### Diethyl (3-cyanobenzyl)(3-methylbut-2-enyl)malonate (**11l**)

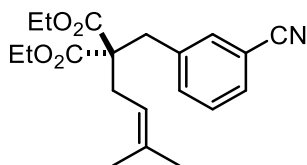

Synthesized through general procedure A from **S1** (228 mg, 1 mmol) and 3-cyanobenzyl bromide (235 mg, 1.2 mmol) to afford compound **11l** as a colorless oil (240 mg, 70% yield).

**<sup>1</sup>H NMR (400 MHz, CDCl<sub>3</sub>):** δ 7.52 (dt, J = 1.7, 7.1 Hz, 1H), 7.40 – 7.30 (m, 3H), 5.08 – 5.01 (m, 1H), 4.20 – 4.14 (two overlapped q, J = 7.1 Hz, 4H), 3.24 (s, 2H), 2.49 (d, J = 7.0 Hz, 2H), 1.76 – 1.74 (m, 3H), 1.60 – 1.58 (m, 3H), 1.23 (t, J = 7.2 Hz, 6H).

$^{13}\text{C}\{^1\text{H}\}$  NMR (100 MHz,  $\text{CDCl}_3$ ):  $\delta$  170.7, 138.1, 136.1, 134.5, 133.7, 130.6, 128.0, 117.2, 112.3, 61.4, 58.7, 37.5, 30.8, 26.0, 18.1, 14.0.

HRMS (ESI+): Calculated for  $\text{C}_{20}\text{H}_{26}\text{NO}_4^+$  [ $\text{MH}^+$ ]: 344.1856; found: 344.1854.

### Diethyl (4-cyanobenzyl)(3-methylbut-2-enyl)malonate (11m)

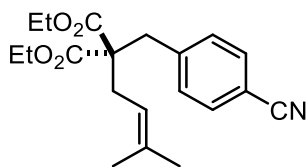

Synthesized through general procedure A from **S1** (228 mg, 1 mmol) and 4-cyanobenzyl bromide (235 mg, 1.2 mmol) to afford compound **11m** as a white solid (269 mg, 78% yield).

M.p. = 60-62 °C.

$^1\text{H}$  NMR (400 MHz,  $\text{CDCl}_3$ ):  $\delta$  7.53 (d,  $J$  = 8.2 Hz, 2H), 7.20 (d,  $J$  = 8.2 Hz, 2H), 5.07 – 5.01 (m, 1H), 4.20 – 4.08 (m, 4H), 3.26 (s, 2H), 2.48 (d,  $J$  = 7.1 Hz, 2H), 1.73 (s, 3H), 1.56 (s, 3H), 1.21 (t,  $J$  = 7.2 Hz, 6H).

$^{13}\text{C}\{^1\text{H}\}$  NMR (100 MHz,  $\text{CDCl}_3$ ):  $\delta$  170.6, 142.2, 136.0, 131.8, 130.8, 118.7, 117.2, 110.8, 61.4, 58.6, 38.0, 30.9, 26.0, 18.0, 13.9.

HRMS (ESI+): Calculated for  $\text{C}_{20}\text{H}_{26}\text{NO}_4^+$  [ $\text{MH}^+$ ]: 344.1856; found: 344.1854.

### Diethyl (4-nitrobenzyl)(3-methylbut-2-enyl)malonate (11n)

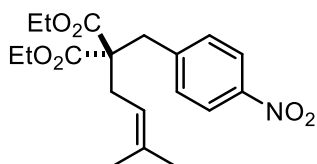

Synthesized through general procedure A from **S1** (228 mg, 1 mmol) and 4-nitrobenzyl bromide (259 mg, 1.2 mmol) to afford compound **11n** as a white solid (330 mg, 91% yield).

M.p. = 55-57 °C.

$^1\text{H}$  NMR (400 MHz,  $\text{CDCl}_3$ ):  $\delta$  8.12 – 8.09 (m, 2H), 7.27 – 7.24 (m, 2H), 5.09 – 5.02 (m, 1H), 4.21 – 4.13 (m, 4H), 3.30 (s, 2H), 2.50 (d,  $J$  = 7.1 Hz, 2H), 1.76 – 1.73 (s, 3H), 1.60 – 1.57 (s, 3H), 1.22 (t,  $J$  = 7.2 Hz, 6H).

$^{13}\text{C}\{^1\text{H}\}$  NMR (100 MHz,  $\text{CDCl}_3$ ):  $\delta$  170.6, 147.0, 144.4, 136.1, 130.9, 123.3, 117.2, 61.5, 58.7, 37.8, 30.9, 26.0, 18.2, 14.0.

HRMS (ESI+): Calculated for  $\text{C}_{19}\text{H}_{26}\text{NO}_6^+$  [ $\text{MH}^+$ ]: 364.1755; found: 364.1749.

### 3,3-Bis(ethoxycarbonyl)-5-methyl-1-(2,4,6-trimethoxyphenyl)-1,2,3,4-tetrahydronaphthalene (12a)

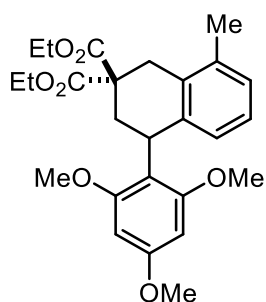

Synthesized by following general procedure B, from **11a** (50 mg, 0.15 mmol) and 1,3,5-trimethoxybenzene (**5**) (30 mg, 0.18 mmol). Purified over silica gel (PE:EA = 93:7 to 85:15) to afford product **12a** as a white solid (50 mg, 73% yield).

**M.p.** = 107.0-108.5 °C.

**<sup>1</sup>H NMR (400 MHz, CDCl<sub>3</sub>):** δ 6.90 – 6.86 (m, 1H), 6.83 (t, J = 7.5 Hz, 1H), 6.56 (br d, J = 7.5 Hz, 1H), 6.13 (br s, 2H), 4.78 (dd, J = 7.0, 11.0 Hz, 1H), 4.26 – 4.07 (m, 4H), 3.97 – 3.20 (overlapped signals, 10H: 3.80, s, 3H; 3.72, br s, 3H; 3.50, br s, 3H; 3.52, dd, J = 1.8, 16.2 Hz, 1H), 2.99 (d, J = 16.2 Hz, 1H), 2.56 – 2.45 (m, 2H), 2.31 (s, 3H), 1.27 (t, J = 7.1 Hz, 3H), 1.19 (t, J = 7.1 Hz, 3H).

**<sup>13</sup>C{<sup>1</sup>H} NMR (100 MHz, CDCl<sub>3</sub>):** δ 172.3, 170.9, 159.7, 159.2 (broad), 139.4, 134.9, 131.7, 126.4, 125.2, 124.6, 114.7, 91.4 (broad), 61.3, 61.0, 55.8 (broad), 55.2, 54.6, 32.7, 31.9, 31.7, 19.9, 14.0, 13.9.

**HRMS (ESI+):** calculated for C<sub>26</sub>H<sub>33</sub>O<sub>7</sub><sup>+</sup> [MH<sup>+</sup>]: 457.2221; found: 457.2221.

### 3,3-Bis(ethoxycarbonyl)-5-fluoro-1-(2,4,6-trimethoxyphenyl)-1,2,3,4-tetrahydronaphthalene (12b)

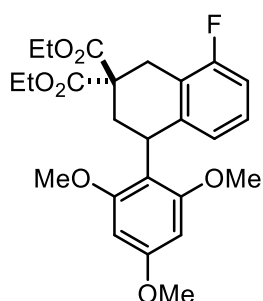

Synthesized by following general procedure B, from **11b** (51 mg, 0.15 mmol) and 1,3,5-trimethoxybenzene (**5**) (30 mg, 0.18 mmol). Purified over silica gel (PE:EA = 9:1) to afford product **12b** as a white solid (27 mg, 39% yield).

**M.p.** = 101-104 °C.

**<sup>1</sup>H NMR (400 MHz, CDCl<sub>3</sub>):** δ 6.92 – 6.85 (m, 1H), 6.78 – 6.71 (m, 1H), 6.50 (d, J = 7.8 Hz, 1H), 6.13 (br s, 2H), 4.74 (apparent t, J = 9.2 Hz, 1H), 4.25 – 4.08 (m, 4H), 4.00 – 3.18 (overlapped signals, 10H: 3.80, s, 3H; 3.78, br s, 3H; 3.70, d, J = 16.5 Hz, 1H; 3.45, br s, 3H), 2.97 (d, J = 16.5 Hz, 1H), 2.51 – 2.43 (m, 2H), 1.26 (t, J = 7.1 Hz, 3H), 1.19 (t, J = 7.1 Hz, 3H).

**<sup>13</sup>C{<sup>1</sup>H} NMR (100 MHz, CDCl<sub>3</sub>):** δ 171.8, 170.6, 160.2 (d, J = 243.2 Hz), 160.0, 159.1, 142.4 (d, J = 3.8 Hz), 126.2 (d, J = 8.9 Hz), 122.3 (d, J = 3.0 Hz), 121.1 (d, J = 16.8 Hz), 113.8, 111.1 (d, J = 21.5 Hz), 91.5 (broad), 61.5, 61.2, 55.7 (broad), 55.3, 53.8, 32.8, 31.5 (d, J = 2.4 Hz), 27.6 (d, J = 5.6 Hz), 14.1, 14.0.

**HRMS (ESI+):** calculated for C<sub>25</sub>H<sub>30</sub>FO<sub>7</sub><sup>+</sup> [MH<sup>+</sup>]: 461.1970; found: 461.1961.

### 3,3-Bis(ethoxycarbonyl)-5-chloro-1-(2,4,6-trimethoxyphenyl)-1,2,3,4-tetrahydronaphthalene (12c)

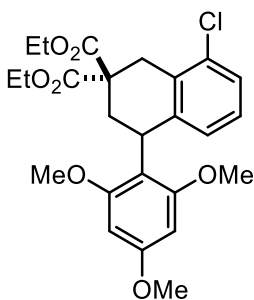

Synthesized by following general procedure B, from **11c** (53 mg, 0.15 mmol) and 1,3,5-trimethoxybenzene (**5**) (30 mg, 0.18 mmol). Purified over silica gel (PE:EA = 9:1 to 7:3) to afford product **12c** as a white solid (31 mg, 43% yield).

**M.p.** = 133.0-136.5 °C

**<sup>1</sup>H NMR (400 MHz, CDCl<sub>3</sub>):** δ 7.1 (dt, J = 7.8, 1.1 Hz, 1H), 6.86 (apparent t, J = 7.8 Hz, 1H), 6.63 (dt, J = 7.8, 1.1 Hz, 1H), 6.12 (br s, 2H), 4.75 (t, J = 9.1 Hz, 1H), 4.26 – 4.09 (m, 4H), 3.95 – 3.26 (overlapped signals, 10H: 3.81, d, J = 16.7 Hz, 1H; 3.80, s, 3H; 3.62, br s, 6H), 3.01 (d, J = 16.7 Hz, 1H), 2.50 – 2.43 (m, 2H), 1.27 (t, J = 7.1 Hz, 3H), 1.19 (t, J = 7.1 Hz, 3H).

**<sup>13</sup>C{<sup>1</sup>H} NMR (100 MHz, CDCl<sub>3</sub>):** δ 171.8, 170.6, 160.0, 159.1 (broad), 142.3, 133.2, 131.4, 126.4, 125.8, 125.4, 113.8, 91.2 (broad), 61.5, 61.2, 55.7 (broad), 55.3, 54.4, 32.7, 32.4, 31.9, 14.1, 13.9.

**HRMS (ESI+):** calculated for C<sub>25</sub>H<sub>30</sub>ClO<sub>7</sub><sup>+</sup> [MH<sup>+</sup>]: 477.1675; found: 477.1674.



### 3,3-Bis(ethoxycarbonyl)-5-methoxy-1-(2,4,6-trimethoxyphenyl)-1,2,3,4-tetrahydronaphthalene (12d)

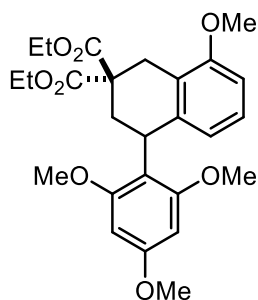

Synthesized by following general procedure B, from **11d** (52 mg, 0.15 mmol) and 1,3,5-trimethoxybenzene (**5**) (30 mg, 0.18 mmol). Purified over silica gel (PE:EA = 93:7 to 85:15) to afford product **12d** as a white solid (39 mg, 55% yield).

**M.p.** = 133.0-137.0 °C.

**<sup>1</sup>H NMR (400 MHz, CDCl<sub>3</sub>):** δ 6.89 (apparent t, J = 8.3 Hz, 1H), 6.57 (d, J = 8.3 Hz, 1H), 6.33 (d, J = 8.0 Hz, 1H), 6.13 (br s, 2H), 4.71 (dd, J = 6.4, 11.9 Hz, 1H), 4.26 – 4.07 (m, 4H), 3.93 – 3.59 (overlapped signals, 10H: 3.83, s, 1H; 3.80, s, 3H; 3.73, d, J = 16.7 Hz, 3H), 3.42 (br s, 3H), 2.85 (d, J = 16.7 Hz, 1H), 2.57 – 2.40 (m, 2H), 1.26 (t, J = 7.1 Hz, 3H), 1.20 (t, J = 7.1 Hz, 3H).

**<sup>13</sup>C{<sup>1</sup>H} NMR (100 MHz, CDCl<sub>3</sub>):** δ 172.3, 170.9, 159.5, 159.2 (broad), 156.4, 140.9, 125.7, 122.3, 119.2, 114.4, 106.3, 92.1 (broad), 90.7 (broad), 61.3, 60.9, 55.7 (broad), 55.3, 55.2, 54.1, 32.6, 31.6, 28.5, 14.0, 13.9.

**HRMS (ESI+):** calculated for C<sub>26</sub>H<sub>33</sub>O<sub>8</sub><sup>+</sup> [MH<sup>+</sup>]: 473.2170; found: 473.2163.

### 3,3-Bis(ethoxycarbonyl)-6-methyl-1-(2,4,6-trimethoxyphenyl)-1,2,3,4-tetrahydronaphthalene (12e)

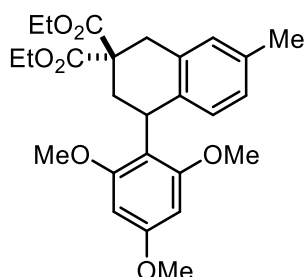

Synthesized by following general procedure B, from **11e** (50 mg, 0.15 mmol) and 1,3,5-trimethoxybenzene (**5**) (30 mg, 0.18 mmol). Purified over silica gel (PE:EA = 93:7 to 85:15) to afford product **12e** as a white solid (42 mg, 61% yield).

**M.p.** = 106-108 °C.

**<sup>1</sup>H NMR (400 MHz, CDCl<sub>3</sub>):** δ 6.88 (s, 1H), 6.75 (d, J = 7.9 Hz, 1H), 6.57 (d, J = 7.9 Hz, 1H), 6.13 (br s, 2H), 4.74 (apparent t, J = 9.4 Hz, 1H), 4.25 – 4.05 (m, 4H), 3.97 – 3.17 (overlapped signals, 11H: 3.80, s, 3H; 3.75, br s, 3H; 3.50, br s, 3H; 3.39, d, J = 15.9 Hz, 1H; 3.22, d, J = 15.9 Hz, 1H), 2.52 – 2.45 (m, 2H), 2.23 (s, 3H), 1.25 (t, J = 7.2 Hz, 3H), 1.18 (t, J = 7.2 Hz, 3H).

**<sup>13</sup>C{<sup>1</sup>H} NMR (100 MHz, CDCl<sub>3</sub>):** δ 172.1, 170.8, 159.7, 159.2 (broad), 136.4, 133.9, 132.9, 128.6, 126.8, 126.7, 114.6, 91.4 (broad), 61.3, 61.0, 55.8 (broad), 55.2, 54.7, 35.2, 33.3, 31.2, 20.9, 14.0, 13.9.

**HRMS (ESI+):** calculated for C<sub>26</sub>H<sub>33</sub>O<sub>7</sub><sup>+</sup> [MH<sup>+</sup>]: 457.2221; found: 457.2220.

### 3,3-Bis(ethoxycarbonyl)-6-fluoro-1-(2,4,6-trimethoxyphenyl)-1,2,3,4-tetrahydronaphthalene (**12f**)

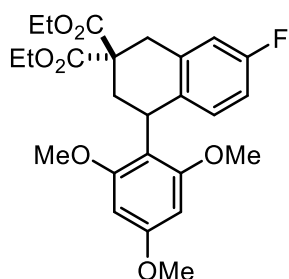

Synthesized by following general procedure B, from **11f** (51 mg, 0.15 mmol) and 1,3,5-trimethoxybenzene (**5**) (30 mg, 0.18 mmol). Purified over silica gel (PE:EA = 9:1 to 7:3) to afford product **12f** as a white solid (56 mg, 81% yield).

**M.p.** = 126-128 °C

**<sup>1</sup>H NMR (400 MHz, CDCl<sub>3</sub>):** δ 6.78 (dd, J = 2.2, 9.4 Hz, 1H), 6.68 – 6.58 (m, 2H), 6.13 (br s, 2H), 4.74 (dd, J = 6.7, 11.2 Hz, 1H), 4.25 – 4.07 (m, 4H), 4.00 – 3.15 (overlapped signals, 11H: 3.80, s, 3H; 3.62, br s, 6H; 3.41, dd, J = 2.5, 16.1 Hz, 1H; 3.24, d, J = 16.1 Hz, 1H), 2.52 (ddd, J = 2.4, 6.7, 13.0 Hz, 1H), 2.43 (dd, J = 11.4, 12.4 Hz, 1H), 1.25 (t, J = 7.1 Hz, 3H), 1.18 (t, J = 7.1 Hz, 3H).

**<sup>13</sup>C{<sup>1</sup>H} NMR (100 MHz, CDCl<sub>3</sub>):** δ 171.8, 170.6, 160.3 (d, J = 242 Hz), 159.9, 159.1, 135.3 – 135.2 (2 overlapped d), 128.3 (d, J = 8.2 Hz), 114.2 (d, J = 10.2 Hz), 114.1 (d, J = 10.2 Hz), 112.9 (d, J = 21.2 Hz), 91.1 (broad), 61.5, 61.2, 55.8 (broad), 55.3, 54.6, 35.3, 33.2, 31.1, 14.1, 14.0.

**HRMS (ESI+):** calculated for C<sub>25</sub>H<sub>30</sub>FO<sub>7</sub><sup>+</sup> [MH<sup>+</sup>]: 461.1970; found: 461.1963.

### 3,3-Bis(ethoxycarbonyl)-6-chloro-1-(2,4,6-trimethoxyphenyl)-1,2,3,4-tetrahydronaphthalene (12g)

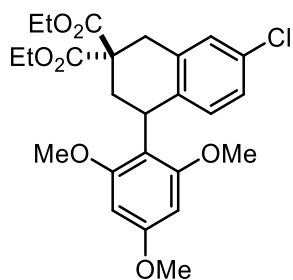

Synthesized by following general procedure B, from **11g** (53 mg, 0.15 mmol) and 1,3,5-trimethoxybenzene (**5**) (30 mg, 0.18 mmol). Purified over silica gel (PE:EA = 9:1 to 7:3) to afford product **12g** as a white solid (57 mg, 90% yield).

**M.p.** = 124.0-126.0 °C.

**<sup>1</sup>H NMR (400 MHz, CDCl<sub>3</sub>):** δ 7.07 (d, J = 2.2 Hz, 1H), 6.89 (dd, J = 2.2, 8.2 Hz, 1H), 6.64 (dd, J = 1.0, 8.2 Hz, 1H), 6.12 (br s, 2H), 4.74 (dd, J = 6.6, 11.5 Hz, 1H), 4.25 – 4.07 (m, 4H), 3.95 – 3.17 (overlapped signals, 11H: 3.80, s, 3H; 3.72, br s, 3H; 3.52, br s, 3H; 3.40, dd, J = 2.5, 16.1 Hz, 1H; 3.22, d, J = 16.1 Hz, 1H), 2.52 (ddd, J = 2.4, 6.7, 13.0 Hz, 1H), 2.42 (dd, J = 11.6, 13.0 Hz, 1H), 1.25 (t, J = 7.1 Hz, 3H), 1.19 (t, J = 7.1 Hz, 3H).

**<sup>13</sup>C{<sup>1</sup>H} NMR (100 MHz, CDCl<sub>3</sub>):** δ 171.6, 170.5, 159.9, 158.9 (broad), 138.3, 135.2, 130.0, 128.3, 127.6, 126.0, 113.6, 91.1 (broad), 61.4, 61.1, 55.6 (broad), 55.2, 54.4, 34.9, 33.0, 31.1, 14.0, 13.9.

**HRMS (ESI+):** calculated for C<sub>25</sub>H<sub>30</sub>ClO<sub>7</sub><sup>+</sup> [MH<sup>+</sup>]: 477.1675; found: 477.1671.

### 3,3-Bis(ethoxycarbonyl)-6-bromo-1-(2,4,6-trimethoxyphenyl)-1,2,3,4-tetrahydronaphthalene (12h)

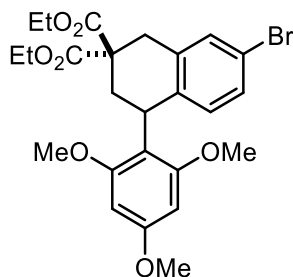

Synthesized by following general procedure B, from **11h** (84 mg, 0.21 mmol) and 1,3,5-trimethoxybenzene (**5**) (42 mg, 0.25 mmol). Purified over silica gel (PE:EA = 9:1 to 7:3) to afford product **12h** as a white solid (86 mg, 78% yield).

**M.p.** = 134-137 °C.

**<sup>1</sup>H NMR (400 MHz, CDCl<sub>3</sub>):** δ 7.22 (d, J = 2.0 Hz, 1H), 7.04 (dd, J = 2.0, 8.2 Hz, 1H), 6.58 (dd, J = 1.0, 8.2 Hz, 1H), 6.12 (br s, 2H), 4.71 (dd, J = 6.6, 11.5 Hz, 1H), 4.25 – 4.07 (m, 4H), 3.95 – 3.17 (overlapped signals, 11H: 3.80, s, 3H; 3.76, br s, 3H; 3.50, br s, 3H; 3.39, dd, J = 2.3, 16.0 Hz, 1H; 3.22, dq, J = 16.0, 1.1 Hz, 1H), 2.51 (ddd, J = 2.5, 6.6, 13.1 Hz, 1H), 2.41 (dd, J = 11.6, 13.1 Hz, 1H), 1.25 (t, J = 7.1 Hz, 3H), 1.19 (t, J = 7.1 Hz, 3H).

**<sup>13</sup>C{<sup>1</sup>H} NMR (100 MHz, CDCl<sub>3</sub>):** δ 171.6, 170.5, 160.0, 159.0 (broad), 138.9, 135.6, 130.6, 128.9, 128.7, 118.2, 113.6, 91.2 (broad), 61.5, 61.2, 55.7 (broad), 55.2, 54.4, 34.9, 33.0, 31.2, 14.0, 13.9.

**HRMS (ESI+):** calculated for C<sub>25</sub>H<sub>30</sub>BrO<sub>7</sub><sup>+</sup> [MH<sup>+</sup>]: 521.1169; found: 521.1165.

### 3,3-Bis(ethoxycarbonyl)-6-methoxy-1-(2,4,6-trimethoxyphenyl)-1,2,3,4-tetrahydronaphthalene (12i)

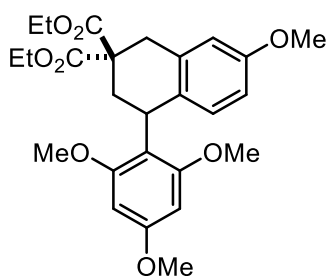

Synthesized by following general procedure B, from **11i** (35 mg, 0.1 mmol) and 1,3,5-trimethoxybenzene (**5**) (20 mg, 0.12 mmol). Purified over silica gel (PE:EA = 9:1 to 8:2) to afford product **12i** as a yellowish solid (31 mg, 66% yield).

**M.p.** = 95.0-96.5 °C.

**<sup>1</sup>H NMR (400 MHz, CDCl<sub>3</sub>):** δ 6.62 (d, J = 2.6 Hz, 1H), 6.61 (dd, J = 0.9, 8.6 Hz, 1H), 6.51 (dd, J = 2.6, 8.6 Hz, 1H), 6.13 (br s, 2H), 4.73 (dd, J = 7.2, 11.0 Hz, 1H), 4.25 – 4.07 (m, 4H), 3.90 – 3.33 (overlapped signals, 14H: 3.80, s, 3H; 3.74, s, 3H, 3.71, br s, 3H; 3.47, br s, 3H; 3.40, dd, J = 1.7, 15.8 Hz, 1H; 3.22, d, J = 15.8 Hz, 1H), 2.51 (ddd, J = 2.1, 7.0, 13.0 Hz, 1H), 2.46 (dd, J = 11.4, 13.0 Hz, 1H), 1.25 (t, J = 7.1 Hz, 3H), 1.19 (t, J = 7.1 Hz, 3H).

**<sup>13</sup>C{<sup>1</sup>H} NMR (100 MHz, CDCl<sub>3</sub>):** δ 172.0, 170.7, 159.7, 159.2 (broad), 156.7, 134.3, 131.8, 127.8, 114.6, 112.6, 112.1, 91.4 (broad), 61.4, 61.0, 55.9 (broad), 55.2, 55.0, 54.7, 35.5, 33.3, 30.8, 14.0, 13.9.

**HRMS (ESI+):** calculated for C<sub>26</sub>H<sub>33</sub>O<sub>8</sub><sup>+</sup> [MH<sup>+</sup>]: 473.2170; found: 473.2173.

### 3,3-Bis(ethoxycarbonyl)-7-bromo-1-(2,4,6-trimethoxyphenyl)-1,2,3,4-tetrahydronaphthalene (12j)

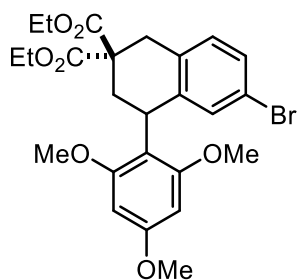

Synthesized by following general procedure B, from **11j** (60 mg, 0.15 mmol) and 1,3,5-trimethoxybenzene (**5**) (30 mg, 0.18 mmol). Purified over silica gel (PE:EA = 85:15 to 80:20) to afford product **12j** as a white solid (60 mg, 77% yield).

**M.p.** = 131-134 °C.

**<sup>1</sup>H NMR (400 MHz, CDCl<sub>3</sub>):** δ 7.12 (ddd, J = 0.9, 2.1, 8.1 Hz, 1H), 6.95 (d, J = 8.1 Hz, 1H), 6.84 (dd, J = 1.1, 2.0 Hz, 1H), 6.13 (br s, 2H), 4.75 (dd, J = 6.9, 11.6 Hz, 1H), 4.24 – 4.06 (m, 4H), 3.95 – 3.30 (overlapped signals, 10H: 3.81, s, 3H; 3.73, br s, 3H; 3.54, br s, 3H; 3.39, dd, J = 2.4, 16.0 Hz, 1H; 3.20 – 3.14, m, 1H), 2.51 (ddd, J = 2.6, 6.6, 13.1 Hz, 1H), 2.41 (dd, J = 11.7, 13.1 Hz, 1H), 1.25 (t, J = 7.1 Hz, 3H), 1.19 (t, J = 7.1 Hz, 3H).

**<sup>13</sup>C{<sup>1</sup>H} NMR (100 MHz, CDCl<sub>3</sub>):** δ 171.7, 170.5, 160.0, 158.9 (broad), 142.2, 132.4, 129.7, 129.6, 127.9, 119.7, 113.4, 91.3 (broad), 61.5, 61.2, 55.7 (broad), 55.2, 54.4, 34.7, 33.0, 31.5, 14.0, 13.9.

**HRMS (ESI+):** calculated for C<sub>25</sub>H<sub>30</sub>BrO<sub>7</sub><sup>+</sup> [MH<sup>+</sup>]: 521.1169; found: 521.1162.

### 3,3-Bis(ethoxycarbonyl)-7-methoxycarbonyl-1-(2,4,6-trimethoxyphenyl)-1,2,3,4-tetrahydronaphthalene (12k)

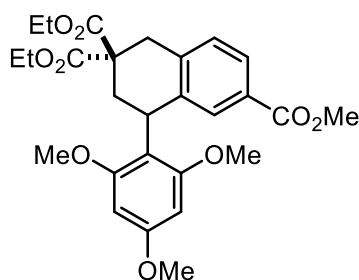

Synthesized by following general procedure B, from **11k** (57 mg, 0.15 mmol) and 1,3,5-trimethoxybenzene (**5**) (30 mg, 0.18 mmol). Purified over silica gel (PE:EA = 85:15 to 75:25) to afford product **12k** as a yellowish solid (54 mg, 72% yield).

**M.p.** = 150-152 °C.

**<sup>1</sup>H NMR (400 MHz, CDCl<sub>3</sub>):** δ 7.67 (ddd, J = 0.8, 1.8, 8.0 Hz, 1H), 7.41 – 7.39 (m, 1H), 7.15 (d, J = 8.0 Hz, 1H), 6.12 (br s, 2H), 4.79 (dd, J = 6.8, 11.6 Hz, 1H), 4.22 – 4.04 (m, 4H), 3.93 – 3.18 (overlapped signals, 14H: 3.80, s, 3H; 3.77, s, 3H; 3.62, br s, 6H; 3.48, dd, J = 2.6, 16.3 Hz, 1H; 3.30 – 3.24, m, 1H), 2.54 (ddd, J = 2.5, 6.6, 13.0 Hz, 1H), 2.40 (dd, J = 11.8, 13.0 Hz, 1H), 1.25 (t, J = 7.0 Hz, 3H), 1.16 (t, J = 7.0 Hz, 3H).

**<sup>13</sup>C{<sup>1</sup>H} NMR (100 MHz, CDCl<sub>3</sub>):** δ 171.6, 170.4, 167.4, 159.9, 158.9, 140.2, 139.0, 128.2, 128.1, 127.8, 125.9, 113.6, 91.3 (broad), 61.4, 61.1, 55.6 (broad), 55.1, 54.4, 51.6, 35.4, 33.3, 31.5, 14.0, 13.9.

**HRMS (ESI+):** calculated for C<sub>27</sub>H<sub>33</sub>O<sub>9</sub><sup>+</sup> [MH<sup>+</sup>]: 501.2119; found: 501.2123.

## 2-[3,3-Bis(ethoxycarbonyl)-4-(4-cyanophenyl)-1-buten-1-yl]-1,3,5-trimethoxybenzene (13m)

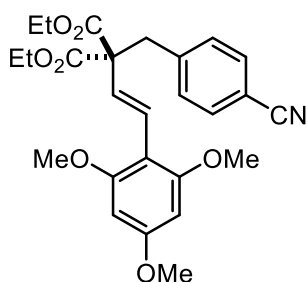

Synthesized by following general procedure B, from **11m** (52 mg, 0.15 mmol) and 1,3,5-trimethoxybenzene (**5**) (30 mg, 0.18 mmol). Purified over silica gel (PE:EA = 85:15 to 80:20) to afford product **13m** as an orange solid (29 mg, 41% yield).

**M.p.** = 112-115 °C.

**<sup>1</sup>H NMR (400 MHz, CDCl<sub>3</sub>):** δ 7.52 – 7.48 (m, 2H), 7.34 – 7.30 (m, 2H), 6.81 (d, J = 17.1 Hz, 1H), 6.72 (d, J = 17.1 Hz, 1H), 6.11 (s, 2H), 4.28 – 4.13 (m, 4H), 3.81 (s, 3H), 3.77 (s, 6H), 3.50 (s, 2H), 1.24 (t, J = 7.1 Hz, 6H).

**<sup>13</sup>C{<sup>1</sup>H} NMR (100 MHz, CDCl<sub>3</sub>):** δ 170.2, 160.5, 159.4, 142.3, 131.5, 131.3, 126.7, 122.6, 119.0, 110.5, 106.9, 90.6, 61.6, 61.5, 55.6, 55.3, 42.5, 14.0.

**HRMS (ESI+):** calculated for C<sub>26</sub>H<sub>30</sub>NO<sub>7</sub><sup>+</sup> [MH<sup>+</sup>]: 468.2017; found: 468.2016.

## 2-[3,3-Bis(ethoxycarbonyl)-4-(4-nitrophenyl)-1-buten-1-yl]-1,3,5-

### trimethoxybenzene (13n)

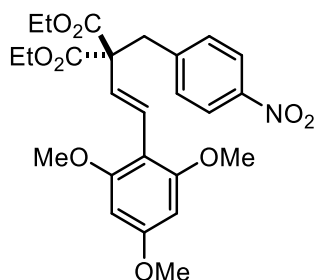

Synthesized by following general procedure B, from **11n** (55 mg, 0.15 mmol) and 1,3,5-trimethoxybenzene (30 mg, 0.18 mmol). Purified over silica gel (PE:EA = 85:15 to 80:20) to afford product **13n** as a yellow solid (25 mg, 34% yield).

**M.p.** = 119.0-120.5 °C.

**<sup>1</sup>H NMR (400 MHz, CDCl<sub>3</sub>):** δ 8.09 – 8.05 (m, 2H), 7.40 – 7.37 (m, 2H), 6.82 (d, J = 16.8 Hz, 1H), 6.74 (d, J = 16.8, 1H), 6.12 (s, 2H), 4.29 – 4.15 (m, 4H), 3.82 (s, 3H), 3.78 (s, 6H), 3.55 (s, 2H), 1.25 (t, J = 7.1 Hz, 6H).

**<sup>13</sup>C{<sup>1</sup>H} NMR (100 MHz, CDCl<sub>3</sub>):** δ 170.2, 160.6, 159.4, 146.9, 144.5, 131.4, 126.6, 122.9, 122.7, 106.9, 90.6, 61.7, 61.5, 55.6, 55.3, 42.3, 14.0.

**HRMS (ESI+):** calculated for C<sub>25</sub>H<sub>30</sub>NO<sub>9</sub><sup>+</sup> [MH<sup>+</sup>]: 488.1915; found: 488.1909.

## 3,3-Bis(ethoxycarbonyl)-1-(2,4-dimethoxyphenyl)-1,2,3,4-tetrahydronaphthalene

### (14)

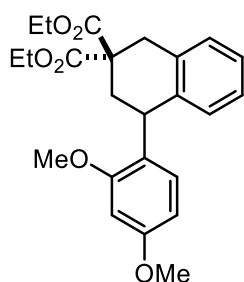

Synthesized by following general procedure B, from **1** (32 mg, 0.1 mmol) and 1,3-dimethoxybenzene (**18**) (16 μL, 0.12 mmol). Purified over silica gel (PE:EA = 95:5 to 90:10) to afford product **14** as a yellowish oil (22 mg, 53% yield).

**<sup>1</sup>H NMR (400 MHz, CDCl<sub>3</sub>):** δ 7.16 – 7.12 (m, 1H), 7.11 – 7.06 (m, 1H), 7.04 – 6.99 (m, 1H), 6.85 (d, J = 8.4 Hz, 1H), 6.79 – 6.77 (m, 1H), 6.48 (d, J = 2.4 Hz, 1H), 6.41 (dd, J = 8.4, 2.4 Hz, 1H), 4.53 (dd, J = 11.0, 6.2

Hz, 1H), 4.26 – 4.05 (m, 4H), 3.79 (s, 3H), 3.75 (s, 3H), 3.43 (dd, J = 16.0, 2.0 Hz, 1H), 3.30 (d, J = 16.0 Hz, 1H), 2.70 (ddd, J = 13.4, 6.1, 2.2 Hz, 1H), 2.25 (dd, J = 13.4, 11.0 Hz, 1H), 1.23 – 1.18 (m, 6H).

$^{13}\text{C}\{^1\text{H}\}$  NMR (100 MHz,  $\text{CDCl}_3$ ):  $\delta$  171.7, 170.8, 159.4, 158.4, 138.5, 134.1, 130.1, 128.8, 128.5, 126.4, 126.1, 125.8, 104.3, 98.6, 61.5, 61.3, 55.5, 55.3, 54.1, 36.0, 35.8, 35.2, 14.0.

HRMS (ESI+): calculated for  $\text{C}_{24}\text{H}_{29}\text{O}_6^+$  [ $\text{MH}^+$ ]: 413.1959; found: 413.1959.

### 3,3-Bis(ethoxycarbonyl)-1-(3,4,5-trimethoxyphenyl)-1,2,3,4-tetrahydronaphthalene (15)

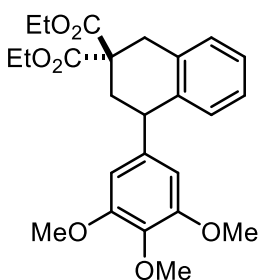

Synthesized by following general procedure B, from **1** (96 mg, 0.3 mmol) and 1,2,3-trimethoxybenzene (61 mg, 0.36 mmol). Purified over silica gel (PE:EA = 9:1) to afford product **15** as a colorless oil (78 mg, 59% yield).

$^1\text{H}$  NMR (400 MHz,  $\text{CDCl}_3$ ):  $\delta$  7.14 (d, J = 7.5 Hz, 1H), 7.10 – 7.05 (m, 1H), 7.02 – 7.97 (m, 1H), 6.78 – 6.75 (m, 1H), 6.73 (d, J = 8.6 Hz, 1H), 6.60 (d, J = 8.6 Hz, 1H), 4.43 (dd, J = 6.4, 11.4 Hz, 1H), 4.20 – 4.12 (m, 4H), 3.87 (s, 3H), 3.83 (s, 3H), 3.61 (br s, 3H), 3.47 (dd, J = 16.2, 2.2 Hz, 1H), 3.30 (d, J = 16.2 Hz, 1H), 2.70 (ddd, J = 13.2, 6.2, 2.4 Hz, 1H), 2.27 (dd, J = 13.2, 11.6 Hz, 1H), 1.24 (t, J = 7.1 Hz, 3H), 1.19 (t, J = 7.1 Hz, 3H).

$^{13}\text{C}\{^1\text{H}\}$  NMR (100 MHz,  $\text{CDCl}_3$ ):  $\delta$  171.6, 170.5, 152.3, 152.1, 142.3, 138.5, 133.9, 131.8, 128.6, 128.5, 126.1, 125.8, 124.0, 107.2, 61.4, 61.2, 60.6, 60.5, 55.8, 54.1, 37.3 (broad), 36.5, 35.1, 13.9 (2 peaks).

HRMS (ESI+): calculated for  $\text{C}_{25}\text{H}_{31}\text{O}_7^+$  [ $\text{MH}^+$ ]: 443.2064; found: 443.2061.

### Diethyl (3-methylbut-2-enyl)(phenyl)malonate (16)

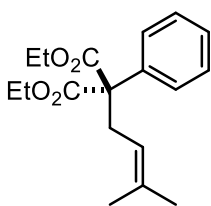

To a solution of NaH 60% (240 mg, 6 mmol, 1.2 equiv) in THF (10 mL) under argon was slowly added diethyl phenylmalonate (1.18 g, 5 mmol) at 0 °C, and the reaction mixture was stirred at room temperature until complete dissolution. Then 3-methylbut-2-enyl bromide (technical 90%, 780  $\mu\text{L}$ , 6 mmol, 1.2 equiv) was added



dropwise at 0 °C and the reaction mixture was stirred vigorously at room temperature for 2.5 hours while being monitored by TLC. After completion, the reaction mixture was quenched with a saturated solution of NH<sub>4</sub>Cl. The mixture was extracted with EtOAc (3×), dried with Na<sub>2</sub>SO<sub>4</sub>, filtered and concentrated under reduced pressure. The crude mixture was purified by column chromatography (PE/Et<sub>2</sub>O = 98:2 to 90:10) to afford pure product **16** (1.29 g, 85% yield) as a colorless liquid.

**<sup>1</sup>H NMR (400 MHz, CDCl<sub>3</sub>):** δ 7.44 – 7.40 (m, 2H), 7.35 – 7.27 (m, 3H), 5.08 – 5.03 (m, 1H), 4.26 – 4.14 (m, 4H), 3.04 – 3.01 (m, 2H), 1.64 – 1.62 (m, 3H), 1.52 – 15.0 (m, 3H), 1.23 (t, J = 7.1 Hz, 6H).

**<sup>13</sup>C{<sup>1</sup>H} NMR (100 MHz, CDCl<sub>3</sub>):** δ 170.6, 136.9, 135.3, 128.3, 128.0, 127.4, 118.3, 62.6, 61.4, 34.4, 25.9, 17.8, 14.0.

**HRMS (ESI+):** Calculated for C<sub>18</sub>H<sub>25</sub>O<sub>4</sub><sup>+</sup> [MH<sup>+</sup>]: 305.1747; found: 305.1748.

### 3,3-Bis(ethoxycarbonyl)-1-(2,4,6-trimethoxyphenyl)-1,2-dihydroindene (17)

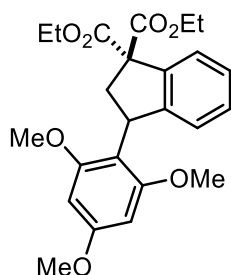

Synthesized by following general procedure B, from **16** (31 mg, 0.1 mmol) and 1,3,5-trimethoxybenzene (19 mg, 0.12 mmol). Purified over silica gel (PE:EA = 95:5 to 80:20) to afford product **17** as a yellowish wax (23 mg, 54% yield).

**M.p.** = 70-78°C.

**<sup>1</sup>H NMR (400 MHz, CDCl<sub>3</sub>):** δ 7.57 – 7.55 (m, 1H), 7.20 – 7.12 (m, 2H), 6.80 – 6.78 (m, 1H), 6.13 (s, 2H), 5.12 – 5.08 (t, J = 8.9 Hz, 1H), 4.31 – 4.13 (m, 4H), 3.90 – 3.35 (overlapped signals, 9H: 3.82, br s, 3H; 3.80, s, 3H; 3.35, br s, 3H), 3.11 (dd, J = 13.1, 9.0 Hz, 1H), 2.84 (dd, J = 13.1, 9.0 Hz, 1H), 1.32 – 1.23 (m, 6H).

**<sup>13</sup>C{<sup>1</sup>H} NMR (100 MHz, CDCl<sub>3</sub>):** δ 171.1 (2 peaks), 160.0, 148.9, 138.3, 128.1, 126.2, 125.6, 123.1, 112.1, 91.1 (broad), 65.3, 61.6, 61.2, 55.6 (broad), 55.3, 39.4, 38.1, 14.1, 14.0.

**HRMS (ESI+):** calculated for C<sub>24</sub>H<sub>29</sub>O<sub>7</sub><sup>+</sup> [MH<sup>+</sup>]: 429.1908; found: 429.1904.

# Crystal structure determination of **6**

## Experimental

Single crystals of  $C_{25}H_{30}O_7$  (**6**) were obtained from an EtOAc solution. A suitable crystal was selected and analyzed on a STOE STADIVARI diffractometer. The crystal was kept at 150 K during data collection. Using Olex2 [3], the structure was solved with the SHELXT [4] structure solution program using Intrinsic Phasing and refined with the SHELXL [5] refinement package using Least Squares minimisation.

## Crystal Data

$C_{25}H_{30}O_7$  ( $M=442.49$  g/mol): triclinic, space group P-1 (no. 2),  $a = 7.9422(11)$  Å,  $b = 9.7764(15)$  Å,  $c = 15.865(2)$  Å,  $\alpha = 103.980(12)^\circ$ ,  $\beta = 96.137(12)^\circ$ ,  $\gamma = 104.119(11)^\circ$ ,  $V = 1141.1(3)$  Å<sup>3</sup>,  $Z = 2$ ,  $T = 150$  K,  $\mu(\text{Mo K}\alpha) = 0.094$  mm<sup>-1</sup>,  $D_{\text{calc}} = 1.288$  g/cm<sup>3</sup>, 10592 reflections measured ( $5.374^\circ \leq 2\theta \leq 58.246^\circ$ ), 5295 unique ( $R_{\text{int}} = 0.0389$ ,  $R_{\text{sigma}} = 0.0546$ ) which were used in all calculations. The final  $R_1$  was 0.0634 ( $I > 2\sigma(I)$ ) and  $wR_2$  was 0.2190 (all data).

**Table 1** Crystal data and structure refinement for **6**.

|                                               |                                                                    |
|-----------------------------------------------|--------------------------------------------------------------------|
| Identification code                           | JAPB67-1                                                           |
| Empirical formula                             | $C_{25}H_{30}O_7$                                                  |
| Formula weight                                | 442.49                                                             |
| Temperature/K                                 | 150                                                                |
| Crystal system                                | triclinic                                                          |
| Space group                                   | P-1                                                                |
| $a/\text{Å}$                                  | 7.9422(11)                                                         |
| $b/\text{Å}$                                  | 9.7764(15)                                                         |
| $c/\text{Å}$                                  | 15.865(2)                                                          |
| $\alpha/^\circ$                               | 103.980(12)                                                        |
| $\beta/^\circ$                                | 96.137(12)                                                         |
| $\gamma/^\circ$                               | 104.119(11)                                                        |
| Volume/Å <sup>3</sup>                         | 1141.1(3)                                                          |
| Z                                             | 2                                                                  |
| $\rho_{\text{calc}}/\text{g/cm}^3$            | 1.288                                                              |
| $\mu/\text{mm}^{-1}$                          | 0.094                                                              |
| F(000)                                        | 472.0                                                              |
| Crystal size/mm <sup>3</sup>                  | ? x ? x ?                                                          |
| Radiation                                     | Mo K $\alpha$ ( $\lambda = 0.71073$ )                              |
| $2\theta$ range for data collection/ $^\circ$ | 5.374 to 58.246                                                    |
| Index ranges                                  | $-10 \leq h \leq 10$ , $-12 \leq k \leq 12$ , $-15 \leq l \leq 21$ |

Reflections collected 10592  
 Independent reflections 5295 [ $R_{\text{int}} = 0.0389$ ,  $R_{\text{sigma}} = 0.0546$ ]  
 Data/restraints/parameters 5295/8/304  
 Goodness-of-fit on  $F^2$  1.173  
 Final R indexes [ $I \geq 2\sigma(I)$ ]  $R_1 = 0.0634$ ,  $wR_2 = 0.1949$   
 Final R indexes [all data]  $R_1 = 0.0899$ ,  $wR_2 = 0.2190$   
 Largest diff. peak/hole /  $e \text{ \AA}^{-3}$  0.55/-0.40

**Table 2** Fractional Atomic Coordinates ( $\times 10^4$ ) and Equivalent Isotropic Displacement Parameters ( $\text{\AA}^2 \times 10^3$ ) for **6**.  $U_{\text{eq}}$  is defined as 1/3 of the trace of the orthogonalised  $U_{ij}$  tensor.

| Atom | x          | y          | z          | U(eq)    |
|------|------------|------------|------------|----------|
| O001 | 2089.4(18) | 9219.8(15) | 1758.5(10) | 33.0(4)  |
| O002 | 4177.7(17) | 5279.9(15) | 2074.5(9)  | 31.3(4)  |
| O003 | 6765.8(19) | 8307.3(17) | 292.7(10)  | 36.2(4)  |
| O004 | 1871(3)    | 7588(2)    | 5537.0(11) | 56.0(5)  |
| O005 | 3748(2)    | 6383(3)    | 5012.4(11) | 60.7(6)  |
| O006 | 6(3)       | 8314(3)    | 3934.9(15) | 80.0(8)  |
| C007 | 3280(2)    | 8442(2)    | 1555.6(13) | 25.9(4)  |
| C008 | 5625(2)    | 7907(2)    | 833.4(13)  | 28.0(4)  |
| C009 | 3157(2)    | 7255(2)    | 1907.8(12) | 25.4(4)  |
| C00A | 592(2)     | 5317(2)    | 2106.3(13) | 26.0(4)  |
| O00B | -1628(3)   | 6207(3)    | 4044.3(17) | 83.4(8)  |
| C00C | 2690(3)    | 7212(2)    | 3439.4(13) | 28.5(4)  |
| C00D | 5554(2)    | 6722(2)    | 1165.7(13) | 28.5(4)  |
| C00E | 4327(2)    | 6415(2)    | 1704.4(13) | 26.4(4)  |
| C00F | 4508(3)    | 8786(2)    | 1023.5(13) | 28.2(4)  |
| C00G | 1804(2)    | 6873(2)    | 2482.7(12) | 25.3(4)  |
| C00H | 5390(3)    | 4426(2)    | 1943.6(15) | 33.6(5)  |
| C00I | 185(3)     | 4375(2)    | 2627.5(14) | 29.9(5)  |
| C00J | 1452(3)    | 6484(2)    | 3985.4(13) | 30.2(5)  |
| C00K | 2373(3)    | 6911(2)    | 4938.8(14) | 36.9(5)  |
| C00L | -185(3)    | 4857(2)    | 1216.2(14) | 32.8(5)  |
| C00M | -973(3)    | 2976(2)    | 2241.6(17) | 37.8(5)  |
| C00N | -1324(3)   | 3474(3)    | 845.9(16)  | 40.1(6)  |
| C00O | 968(3)     | 4824(2)    | 3585.5(14) | 36.1(5)  |
| C00P | 8011(3)    | 7492(3)    | 114.4(16)  | 39.9(5)  |
| C00Q | -1708(3)   | 2523(2)    | 1357.4(17) | 44.6(6)  |
| C00R | -236(3)    | 6971(3)    | 3994.2(15) | 43.2(6)  |
| C00S | 2067(3)    | 10369(3)   | 1366.5(17) | 44.1(6)  |
| C00T | 4755(4)    | 6700(4)    | 5890.6(16) | 60.0(8)  |
| C00U | -1720(4)   | 9381(3)    | 3132.2(19) | 62.7(8)  |
| C00V | 6378(5)    | 7907(4)    | 6023(2)    | 92.2(12) |
| C00W | -1073(10)  | 9324(8)    | 4047(5)    | 51.2(15) |
| C00X | -1856(7)   | 8541(7)    | 3742(4)    | 48.7(13) |

**Table 3** Anisotropic Displacement Parameters ( $\text{\AA}^2 \times 10^3$ ) for **6**. The Anisotropic displacement factor exponent takes the form:  $-2\pi^2[h^2a^2U_{11}+2hka^*b^*U_{12}+\dots]$ .

| Atom | $U_{11}$ | $U_{22}$  | $U_{33}$  | $U_{23}$ | $U_{13}$ | $U_{12}$ |
|------|----------|-----------|-----------|----------|----------|----------|
| O001 | 35.7(8)  | 33.4(8)   | 40.0(8)   | 16.2(6)  | 16.4(7)  | 18.0(6)  |
| O002 | 27.5(8)  | 36.1(8)   | 40.2(8)   | 18.1(6)  | 16.1(6)  | 15.1(6)  |
| O003 | 29.6(8)  | 45.7(8)   | 45.2(9)   | 24.4(7)  | 19.9(7)  | 14.8(6)  |
| O004 | 73.8(13) | 63.6(12)  | 35.1(9)   | 5.4(8)   | 9.8(9)   | 35.4(10) |
| O005 | 51.7(11) | 104.3(16) | 33.6(9)   | 14.4(9)  | 4.4(8)   | 41.3(11) |
| O006 | 98.9(17) | 113.4(19) | 98.7(17)  | 78.3(15) | 71.7(14) | 87.3(15) |
| C007 | 23.2(10) | 27.1(9)   | 27.1(10)  | 5.8(8)   | 3.7(8)   | 8.4(7)   |
| C008 | 21.8(10) | 31.1(10)  | 29.2(10)  | 8.5(8)   | 6.0(8)   | 3.1(8)   |
| C009 | 20.9(10) | 30.5(10)  | 23.6(9)   | 5.7(8)   | 5.1(8)   | 6.4(7)   |
| C00A | 17.0(9)  | 31.2(10)  | 30.9(10)  | 6.1(8)   | 8.9(8)   | 9.1(7)   |
| O00B | 36.1(11) | 92.2(16)  | 107.7(18) | -8.0(14) | 29.9(12) | 19.8(10) |
| C00C | 26.0(10) | 31.1(10)  | 27.3(10)  | 6.7(8)   | 7.1(8)   | 6.2(8)   |
| C00D | 22.1(10) | 30.8(10)  | 33.4(11)  | 7.7(8)   | 8.5(8)   | 8.7(8)   |
| C00E | 22.7(10) | 27.4(9)   | 29.2(10)  | 8.6(8)   | 4.4(8)   | 6.5(7)   |
| C00F | 25.8(10) | 26.7(9)   | 32.4(10)  | 10.3(8)  | 6.7(8)   | 5.0(8)   |
| C00G | 21.9(10) | 28.7(9)   | 29.3(10)  | 10.6(8)  | 7.9(8)   | 10.6(8)  |
| C00H | 28.7(11) | 34.6(11)  | 44.0(12)  | 15.0(9)  | 12.0(9)  | 14.4(8)  |
| C00I | 21.6(10) | 30.0(10)  | 42.8(12)  | 12.3(9)  | 12.2(9)  | 10.8(8)  |
| C00J | 28.5(11) | 39.4(11)  | 27.8(10)  | 13.7(9)  | 10.1(8)  | 12.3(9)  |
| C00K | 38.4(13) | 45.0(12)  | 31.6(11)  | 15.2(10) | 13.8(10) | 12.0(10) |
| C00L | 22.0(10) | 41.7(11)  | 34.5(11)  | 7.0(9)   | 8.9(9)   | 10.4(8)  |
| C00M | 26.3(11) | 30.6(11)  | 60.4(15)  | 14.3(10) | 14.5(10) | 10.8(8)  |
| C00N | 22.6(11) | 47.3(13)  | 40.0(12)  | -3.1(10) | 8.4(9)   | 4.6(9)   |
| C00O | 35.1(12) | 39.6(11)  | 38.2(12)  | 20.5(9)  | 7.7(9)   | 8.7(9)   |
| C00P | 29.1(11) | 54.9(14)  | 50.7(14)  | 29.1(11) | 19.7(10) | 19.4(10) |
| C00Q | 25.1(11) | 33.4(11)  | 61.9(16)  | -6.2(11) | 12.4(11) | 0.9(9)   |
| C00R | 41.3(14) | 65.3(16)  | 31.8(12)  | 12.9(11) | 15.8(10) | 27.6(12) |
| C00S | 52.9(15) | 40.1(12)  | 56.2(15)  | 25.0(11) | 23.2(12) | 26.4(11) |
| C00T | 55.3(17) | 96(2)     | 31.5(13)  | 16.0(14) | -1.5(12) | 31.5(16) |
| C00U | 58.0(18) | 70.4(19)  | 55.6(17)  | 3.5(14)  | -6.9(14) | 31.4(15) |
| C00V | 110(3)   | 87(2)     | 58(2)     | 22.2(18) | -23(2)   | 3(2)     |
| C00W | 49(4)    | 50(3)     | 63(4)     | 14(3)    | 12(3)    | 31(3)    |
| C00X | 39(3)    | 54(3)     | 65(3)     | 21(3)    | 15(2)    | 28(2)    |

**Table 4** Bond Lengths for **6**.

| Atom | Atom | Length/ $\text{\AA}$ | Atom | Atom | Length/ $\text{\AA}$ |
|------|------|----------------------|------|------|----------------------|
| O001 | C007 | 1.369(2)             | C00A | C00G | 1.523(3)             |
| O001 | C00S | 1.412(3)             | C00A | C00I | 1.385(3)             |
| O002 | C00E | 1.362(2)             | C00A | C00L | 1.396(3)             |
| O002 | C00H | 1.421(2)             | O00B | C00R | 1.196(3)             |
| O003 | C008 | 1.366(2)             | C00C | C00G | 1.524(3)             |
| O003 | C00P | 1.425(2)             | C00C | C00J | 1.537(3)             |
| O004 | C00K | 1.185(3)             | C00D | C00E | 1.389(3)             |
| O005 | C00K | 1.323(3)             | C00I | C00M | 1.398(3)             |

**Table 4** Bond Lengths for **6**.

| Atom | Atom | Length/Å | Atom | Atom | Length/Å |
|------|------|----------|------|------|----------|
| O005 | C00T | 1.453(3) | C00I | C00O | 1.494(3) |
| O006 | C00R | 1.308(3) | C00J | C00K | 1.519(3) |
| O006 | C00W | 1.449(6) | C00J | C00O | 1.527(3) |
| O006 | C00X | 1.557(5) | C00J | C00R | 1.528(3) |
| C007 | C009 | 1.392(3) | C00L | C00N | 1.377(3) |
| C007 | C00F | 1.389(3) | C00M | C00Q | 1.380(4) |
| C008 | C00D | 1.376(3) | C00N | C00Q | 1.377(4) |
| C008 | C00F | 1.385(3) | C00T | C00V | 1.476(4) |
| C009 | C00E | 1.397(3) | C00U | C00W | 1.506(7) |
| C009 | C00G | 1.518(2) | C00U | C00X | 1.409(6) |

**Table 5** Bond Angles for **6**.

| Atom | Atom | Atom | Angle/°    | Atom | Atom | Atom | Angle/°    |
|------|------|------|------------|------|------|------|------------|
| C007 | O001 | C00S | 117.68(15) | C009 | C00G | C00C | 110.90(15) |
| C00E | O002 | C00H | 118.63(15) | C00A | C00G | C00C | 113.92(16) |
| C008 | O003 | C00P | 117.16(16) | C00A | C00I | C00M | 118.9(2)   |
| C00K | O005 | C00T | 117.51(19) | C00A | C00I | C00O | 121.27(18) |
| C00R | O006 | C00W | 133.1(4)   | C00M | C00I | C00O | 119.9(2)   |
| C00R | O006 | C00X | 106.9(3)   | C00K | C00J | C00C | 109.63(17) |
| O001 | C007 | C009 | 115.21(16) | C00K | C00J | C00O | 110.73(17) |
| O001 | C007 | C00F | 122.88(17) | C00K | C00J | C00R | 106.76(16) |
| C00F | C007 | C009 | 121.90(18) | C00O | C00J | C00C | 108.02(16) |
| O003 | C008 | C00D | 123.65(18) | C00O | C00J | C00R | 109.14(18) |
| O003 | C008 | C00F | 114.76(18) | C00R | C00J | C00C | 112.58(18) |
| C00D | C008 | C00F | 121.58(18) | O004 | C00K | O005 | 125.0(2)   |
| C007 | C009 | C00E | 117.14(17) | O004 | C00K | C00J | 123.6(2)   |
| C007 | C009 | C00G | 121.85(16) | O005 | C00K | C00J | 111.38(17) |
| C00E | C009 | C00G | 121.01(17) | C00N | C00L | C00A | 121.1(2)   |
| C00I | C00A | C00G | 122.00(17) | C00Q | C00M | C00I | 121.3(2)   |
| C00I | C00A | C00L | 119.32(18) | C00Q | C00N | C00L | 119.8(2)   |
| C00L | C00A | C00G | 118.63(18) | C00I | C00O | C00J | 112.17(17) |
| C00G | C00C | C00J | 111.94(16) | C00N | C00Q | C00M | 119.6(2)   |
| C008 | C00D | C00E | 118.46(17) | O006 | C00R | C00J | 112.5(2)   |
| O002 | C00E | C009 | 115.13(16) | O00B | C00R | O006 | 123.6(2)   |
| O002 | C00E | C00D | 122.65(17) | O00B | C00R | C00J | 123.8(3)   |
| C00D | C00E | C009 | 122.23(18) | O005 | C00T | C00V | 110.1(2)   |
| C008 | C00F | C007 | 118.68(18) | O006 | C00W | C00U | 105.8(4)   |
| C009 | C00G | C00A | 112.30(15) | C00U | C00X | O006 | 105.1(3)   |

**Table 6** Torsion Angles for **6**.

| A    | B    | C    | D    | Angle/°     | A    | B    | C    | D    | Angle/°    |
|------|------|------|------|-------------|------|------|------|------|------------|
| O001 | C007 | C009 | C00E | 178.89(16)  | C00I | C00A | C00G | C009 | 134.49(18) |
| O001 | C007 | C009 | C00G | -0.6(3)     | C00I | C00A | C00G | C00C | 7.4(2)     |
| O001 | C007 | C00F | C008 | -178.08(17) | C00I | C00A | C00L | C00N | -1.1(3)    |

**Table 6** Torsion Angles for **6**.

| <b>A</b> | <b>B</b> | <b>C</b> | <b>D</b> | <b>Angle/°</b> | <b>A</b> | <b>B</b> | <b>C</b> | <b>D</b> | <b>Angle/°</b> |
|----------|----------|----------|----------|----------------|----------|----------|----------|----------|----------------|
| O003     | C008     | C00D     | C00E     | -179.49(17)    | C00I     | C00M     | C00Q     | C00N     | -1.2(3)        |
| O003     | C008     | C00F     | C007     | 178.79(17)     | C00J     | C00C     | C00G     | C009     | -165.32(16)    |
| C007     | C009     | C00E     | O002     | 178.99(16)     | C00J     | C00C     | C00G     | C00A     | -37.5(2)       |
| C007     | C009     | C00E     | C00D     | -0.8(3)        | C00K     | O005     | C00T     | C00V     | -101.0(3)      |
| C007     | C009     | C00G     | C00A     | 121.9(2)       | C00K     | C00J     | C00O     | C00I     | -175.55(17)    |
| C007     | C009     | C00G     | C00C     | -109.3(2)      | C00K     | C00J     | C00R     | O006     | 89.4(2)        |
| C008     | C00D     | C00E     | O002     | -178.94(17)    | C00K     | C00J     | C00R     | O00B     | -91.0(3)       |
| C008     | C00D     | C00E     | C009     | 0.8(3)         | C00L     | C00A     | C00G     | C009     | -48.2(2)       |
| C009     | C007     | C00F     | C008     | 0.7(3)         | C00L     | C00A     | C00G     | C00C     | -175.36(16)    |
| C00A     | C00I     | C00M     | C00Q     | 0.1(3)         | C00L     | C00A     | C00I     | C00M     | 1.1(3)         |
| C00A     | C00I     | C00O     | C00J     | 27.1(3)        | C00L     | C00A     | C00I     | C00O     | -179.33(18)    |
| C00A     | C00L     | C00N     | C00Q     | 0.0(3)         | C00L     | C00N     | C00Q     | C00M     | 1.2(3)         |
| C00C     | C00J     | C00K     | O004     | 117.4(2)       | C00M     | C00I     | C00O     | C00J     | -153.33(18)    |
| C00C     | C00J     | C00K     | O005     | -65.2(2)       | C00O     | C00I     | C00M     | C00Q     | -179.52(19)    |
| C00C     | C00J     | C00O     | C00I     | -55.5(2)       | C00O     | C00J     | C00K     | O004     | -123.6(2)      |
| C00C     | C00J     | C00R     | O006     | -30.9(3)       | C00O     | C00J     | C00K     | O005     | 53.9(2)        |
| C00C     | C00J     | C00R     | O00B     | 148.6(2)       | C00O     | C00J     | C00R     | O006     | -150.9(2)      |
| C00D     | C008     | C00F     | C007     | -0.7(3)        | C00O     | C00J     | C00R     | O00B     | 28.7(3)        |
| C00E     | C009     | C00G     | C00A     | -57.5(2)       | C00P     | O003     | C008     | C00D     | -3.9(3)        |
| C00E     | C009     | C00G     | C00C     | 71.2(2)        | C00P     | O003     | C008     | C00F     | 176.62(18)     |
| C00F     | C007     | C009     | C00E     | 0.0(3)         | C00R     | O006     | C00W     | C00U     | -106.6(5)      |
| C00F     | C007     | C009     | C00G     | -179.47(17)    | C00R     | O006     | C00X     | C00U     | -141.1(4)      |
| C00F     | C008     | C00D     | C00E     | -0.1(3)        | C00R     | C00J     | C00K     | O004     | -4.9(3)        |
| C00G     | C009     | C00E     | O002     | -1.5(3)        | C00R     | C00J     | C00K     | O005     | 172.6(2)       |
| C00G     | C009     | C00E     | C00D     | 178.68(17)     | C00R     | C00J     | C00O     | C00I     | 67.2(2)        |
| C00G     | C00A     | C00I     | C00M     | 178.33(17)     | C00S     | O001     | C007     | C009     | -175.45(18)    |
| C00G     | C00A     | C00I     | C00O     | -2.1(3)        | C00S     | O001     | C007     | C00F     | 3.4(3)         |
| C00G     | C00A     | C00L     | C00N     | -178.48(17)    | C00T     | O005     | C00K     | O004     | -2.3(4)        |
| C00G     | C00C     | C00J     | C00K     | -177.56(16)    | C00T     | O005     | C00K     | C00J     | -179.7(2)      |
| C00G     | C00C     | C00J     | C00O     | 61.7(2)        | C00W     | O006     | C00R     | O00B     | 11.3(6)        |
| C00G     | C00C     | C00J     | C00R     | -58.9(2)       | C00W     | O006     | C00R     | C00J     | -169.1(4)      |
| C00H     | O002     | C00E     | C009     | -176.25(16)    | C00X     | O006     | C00R     | O00B     | -11.9(4)       |
| C00H     | O002     | C00E     | C00D     | 3.6(3)         | C00X     | O006     | C00R     | C00J     | 167.7(3)       |

**Table 7** Hydrogen Atom Coordinates ( $\text{\AA}\times 10^4$ ) and Isotropic Displacement Parameters ( $\text{\AA}^2\times 10^3$ ) for **6**.

| <b>Atom</b> | <b>x</b> | <b>y</b> | <b>z</b> | <b>U(eq)</b> |
|-------------|----------|----------|----------|--------------|
| H00A        | 3065.54  | 8287.95  | 3706.64  | 34           |
| H00B        | 3756.88  | 6859.28  | 3455.57  | 34           |
| H00D        | 6326.17  | 6126.91  | 1029.81  | 34           |
| H00F        | 4580.79  | 9606.85  | 794.47   | 34           |
| H00G        | 1038.18  | 7546.61  | 2476.59  | 30           |
| H00C        | 5259.84  | 3945.69  | 1312.56  | 50           |
| H00E        | 5150.89  | 3677.95  | 2263.75  | 50           |
| H00H        | 6596.16  | 5063.7   | 2164.36  | 50           |

**Table 7** Hydrogen Atom Coordinates ( $\text{\AA}\times 10^4$ ) and Isotropic Displacement Parameters ( $\text{\AA}^2\times 10^3$ ) for **6**.

| <b>Atom</b> | <b>x</b> | <b>y</b> | <b>z</b> | <b>U(eq)</b> |
|-------------|----------|----------|----------|--------------|
| H00L        | 75.84    | 5508.47  | 860      | 39           |
| H00M        | -1259.7  | 2323.15  | 2595.14  | 45           |
| H00N        | -1842.11 | 3177.14  | 239.07   | 48           |
| H00I        | 2039.93  | 4487.82  | 3660.22  | 43           |
| H00J        | 113.43   | 4338.4   | 3906.85  | 43           |
| H00K        | 8738.36  | 7870.99  | -285.29  | 60           |
| H00O        | 7384.72  | 6454.66  | -161.94  | 60           |
| H00P        | 8768.06  | 7588.78  | 667.96   | 60           |
| H00Q        | -2475.16 | 1561.21  | 1103.17  | 54           |
| H00R        | 1865.57  | 9981.29  | 722.92   | 66           |
| H00S        | 3201.21  | 11126.61 | 1565.82  | 66           |
| H00T        | 1118.09  | 10797.43 | 1538.83  | 66           |
| H00U        | 5068.19  | 5810.8   | 5965.8   | 72           |
| H00V        | 4030.98  | 6979.8   | 6338.02  | 72           |
| H00W        | -2348.51 | 8387.71  | 2764.28  | 94           |
| H00X        | -712.24  | 9787.47  | 2873.66  | 94           |
| H00Y        | -2520.03 | 10005.71 | 3163.16  | 94           |
| H           | -1418.28 | 8834.42  | 2592.93  | 94           |
| HA          | -797.4   | 10309.8  | 3389.96  | 94           |
| HB          | -2849.84 | 9583.45  | 2989.36  | 94           |
| H00Z        | 7063.77  | 7647.34  | 5561.26  | 138          |
| HC          | 7083.44  | 8069.9   | 6602.42  | 138          |
| HD          | 6063.75  | 8805.19  | 5992.63  | 138          |
| H00         | -368.99  | 10309.38 | 4417.59  | 61           |
| HE          | -2079.21 | 8967.11  | 4331.35  | 61           |
| H1          | -2760.25 | 7585.58  | 3487.69  | 58           |
| HF          | -2175.86 | 9069.94  | 4289.39  | 58           |

**Table 8** Atomic Occupancy for **6**.

| <b>Atom</b> | <b>Occupancy</b> | <b>Atom</b> | <b>Occupancy</b> | <b>Atom</b> | <b>Occupancy</b> |
|-------------|------------------|-------------|------------------|-------------|------------------|
| H00W        | 0.448(7)         | H00X        | 0.448(7)         | H00Y        | 0.448(7)         |
| H           | 0.552(7)         | HA          | 0.552(7)         | HB          | 0.552(7)         |
| C00W        | 0.448(7)         | H00         | 0.448(7)         | HE          | 0.448(7)         |
| C00X        | 0.552(7)         | H1          | 0.552(7)         | HF          | 0.552(7)         |

## DFT calculation

Calculations were carried out with the Gaussian16 package [6], and all structures were fully optimized without any symmetry constraints at the DFT level by means of the M06 functional, which is known to perform well for main group compounds and noncovalent bonds and to include partly dispersion forces [7]. The 6-31G(d,p) basis set was applied for all atoms. Each stationary point was characterized with frequency analysis and shows the correct number of negative eigenvalues (zero for a local minimum and one for a transition state). The transition state **TS** was verified by stepping along the reaction coordinate (intrinsic reaction coordinate calculation) and confirming that it transformed into the corresponding reactant/product. Final energy calculations at the M06 level associated with the 6-311++G(2d,2p) basis set, including solvation effect, was achieved on the M06/6-31G(d,p) gas phase geometries. The solvent effect is accounted for by means of single point calculations with the integral equation formalism version of the polarizable continuum model (IEFPCM) for dichloromethane. To get accurate geometries and energies, the SCF convergence criterion was systematically tightened to  $10^{-8}$  au, and the force minimizations were carried out until the rms force became smaller than (at least)  $1 \times 10^{-5}$  au ("tight" optimization keyword in Gaussian). The "UltraFine" grid (99 radial shells and 590 angular points per shell) was used throughout the calculations. Cartesian coordinates of the optimized geometries and associated energies and free energy corrections obtained.

### **Cartesian coordinates of the optimized geometries and associated energies and free energy corrections obtained at the IEFPCM(CH<sub>2</sub>Cl<sub>2</sub>)-M06/6-311++G(2d,2p)//M06/6-31G(d,p) level of theory**

#### **Structure 7**

```
C 2.052719000 0.345516000 0.039207000
C 2.825784000 -0.433868000 0.779800000
H 2.523960000 1.106862000 -0.584323000
O 4.241142000 -0.213289000 0.788764000
C 4.557928000 -0.962329000 -1.487054000
H 4.360692000 -0.118631000 -2.164465000
H 5.355184000 -1.551716000 -1.948706000
C 5.016048000 -0.430511000 -0.193371000
H 3.631717000 -1.536626000 -1.399610000
C 6.434727000 -0.129965000 0.041780000
H 6.986173000 -1.080973000 0.070840000
H 6.847560000 0.428981000 -0.806180000
H 6.586749000 0.407441000 0.978547000
```



H 2.534525000 -1.161015000 1.528619000  
C 0.548678000 0.281583000 -0.041186000  
C 0.130556000 -0.735344000 -1.163839000  
H 0.341935000 -0.266653000 -2.133047000  
H 0.808435000 -1.593454000 -1.057186000  
C -0.074189000 -0.233162000 1.260697000  
O 0.411826000 -1.119147000 1.926567000  
O -1.239273000 0.345420000 1.476901000  
C 0.086440000 1.725875000 -0.254588000  
O 0.584640000 2.634069000 0.367007000  
O -0.868658000 1.832291000 -1.161641000  
C -1.560406000 3.101760000 -1.244030000  
H -1.952998000 3.131675000 -2.264276000  
H -0.834088000 3.909355000 -1.111428000  
C -2.653886000 3.132169000 -0.207990000  
H -2.227242000 3.116429000 0.800815000  
H -3.253753000 4.041094000 -0.312557000  
H -3.311625000 2.262809000 -0.324980000  
C -2.079033000 -0.217049000 2.518897000  
H -1.949926000 -1.304916000 2.505995000  
H -1.715021000 0.160195000 3.480880000  
C -3.491677000 0.195929000 2.215464000  
H -3.794432000 -0.187070000 1.233518000  
H -4.169708000 -0.214211000 2.969583000  
H -3.598550000 1.285589000 2.217068000  
C -1.289488000 -1.246601000 -1.111748000  
C -2.320151000 -0.648050000 -1.838924000  
C -1.585936000 -2.362771000 -0.324431000  
C -3.618927000 -1.137269000 -1.759695000  
H -2.101605000 0.206801000 -2.473869000  
C -2.885832000 -2.849348000 -0.237540000  
H -0.788918000 -2.855000000 0.232232000  
C -3.908034000 -2.233287000 -0.952071000  
H -4.408375000 -0.664702000 -2.338839000  
H -3.096495000 -3.720378000 0.378021000  
H -4.923530000 -2.616322000 -0.893696000

There are no imaginary frequencies.

SCF energy = -1114.244126 hartree (M06/6-31G(d,p))

SCF energy = -1114.587778 hartree (IEFPCM(CH<sub>2</sub>Cl<sub>2</sub>)-M06/6-311++G(2d,2p)//M06/6-31G(d,p))

Zero-point correction = +0.408147 hartree

Energy correction = +0.434066 hartree

Enthalpy correction = +0.435010 hartree

Gibbs Free Energy correction = +0.350117 hartree

## Structure 7'

C 1.92947500 0.18375100 -1.28307500  
C 2.26759400 -1.20614900 -0.76763000

H 2.56789300 0.92001800 -0.78235000  
O 3.49858300 -1.46458600 -0.32967100  
C 3.86490200 -0.02049500 1.53011800  
H 2.97265400 -0.38122400 2.03049700  
H 4.47154700 0.71716000 2.04392100  
C 4.25021900 -0.47453500 0.34499700  
H 2.08540200 0.23991000 -2.36457900  
C 5.47063700 -0.12099600 -0.41896400  
H 6.08599600 0.58967800 0.13683300  
H 6.06575000 -1.01840800 -0.62240100  
H 5.21213100 0.32022000 -1.39055300  
H 1.95306500 -2.03201700 -1.41420100  
C 0.46608700 0.42143500 -0.89131900  
C -0.53636200 -0.13262500 -1.95491100  
H -0.75323900 0.69166400 -2.64267000  
H -0.00576600 -0.89936100 -2.53518000  
C 0.38152100 -0.43333900 0.33708600  
O 1.25205300 -1.35328700 0.43165000  
O -0.52879300 -0.24541200 1.19949200  
C 0.23316400 1.85826900 -0.40498000  
O 0.99805700 2.36549100 0.37953500  
O -0.88112700 2.38326700 -0.87354600  
C -1.33248300 3.61268100 -0.23828900  
H -2.02198100 4.04919300 -0.96437300  
H -0.47160200 4.27528900 -0.111108000  
C -2.00222200 3.27753500 1.07027300  
H -1.27807100 2.87411300 1.78586200  
H -2.44573700 4.17656100 1.50782000  
H -2.79743900 2.53796500 0.92009300  
C -0.72667600 -1.20791500 2.30497200  
H -0.77133800 -2.20085400 1.84404200  
H 0.15851600 -1.14014300 2.94578100  
C -2.00425400 -0.80909100 2.97738400  
H -2.83637600 -0.85041000 2.26601600  
H -2.21489500 -1.50218000 3.79661000  
H -1.93539600 0.20068000 3.39214900  
C -1.79862300 -0.73312200 -1.39356500  
C -2.93372000 0.03838400 -1.14356300  
C -1.81652700 -2.08976500 -1.05653100  
C -4.05712600 -0.53212100 -0.55438200  
H -2.93498300 1.09100500 -1.41756900  
C -2.93695800 -2.66186500 -0.46200200  
H -0.94800200 -2.71311300 -1.27885500  
C -4.05938200 -1.87991900 -0.20486400  
H -4.94037500 0.07643800 -0.37709500  
H -2.94166100 -3.72179300 -0.22028000  
H -4.94192900 -2.32493000 0.24707300

There are no imaginary frequencies.

SCF energy = -1114.258938 hartree (M06/6-31G(d,p))

SCF energy = -1114.590680 hartree (IEFPCM(CH<sub>2</sub>Cl<sub>2</sub>)-M06/6-311++G(2d,2p)//M06/6-31G(d,p))

Zero-point correction = +0.412434 hartree

Energy correction = +0.436497 hartree

Enthalpy correction = +0.437441 hartree

Gibbs Free Energy correction = +0.358485 hartree

### Transition state (TS)

C 2.088309000 0.208200000 0.336641000  
C 2.742642000 -0.981244000 0.601335000  
H 2.366265000 1.097981000 0.911721000  
O 4.064443000 -1.117573000 0.531282000  
C 4.463148000 0.976179000 -0.513679000  
H 4.156726000 1.680197000 0.256087000  
H 5.019119000 1.446208000 -1.323452000  
C 4.864977000 -0.307417000 -0.185493000  
H 3.049111000 0.646098000 -0.602616000  
C 6.055898000 -1.018794000 -0.692955000  
H 6.588184000 -0.409442000 -1.425270000  
H 6.741524000 -1.207690000 0.143823000  
H 5.794181000 -1.991104000 -1.121783000  
H 2.249708000 -1.940197000 0.746541000  
C 0.602752000 0.218587000 0.049222000  
C 0.216282000 -0.685996000 -1.162555000  
H 0.454579000 -0.133859000 -2.080012000  
H 0.882312000 -1.559931000 -1.138501000  
C -0.132202000 -0.331853000 1.290612000  
O 0.306222000 -1.244716000 1.950888000  
O -1.292647000 0.266287000 1.453455000  
C 0.231414000 1.700559000 -0.095397000  
O 0.742569000 2.543014000 0.608934000  
O -0.666889000 1.912321000 -1.033713000  
C -1.287272000 3.223375000 -1.079534000  
H -1.603165000 3.336521000 -2.119971000  
H -0.531297000 3.978680000 -0.845359000  
C -2.447697000 3.245469000 -0.119863000  
H -2.096222000 3.131694000 0.911419000  
H -2.986377000 4.194538000 -0.195957000  
H -3.143413000 2.429334000 -0.346752000  
C -2.214285000 -0.321619000 2.413347000  
H -2.118247000 -1.410833000 2.345474000  
H -1.896489000 -0.009458000 3.414089000  
C -3.589974000 0.158222000 2.047597000  
H -3.839900000 -0.153652000 1.026357000  
H -4.327878000 -0.272614000 2.730497000  
H -3.662084000 1.248578000 2.111696000  
C -1.207267000 -1.187494000 -1.193152000  
C -2.213177000 -0.513903000 -1.888226000  
C -1.535074000 -2.360984000 -0.508875000  
C -3.519026000 -0.991146000 -1.880680000  
H -1.969454000 0.389762000 -2.441549000  
C -2.842127000 -2.835671000 -0.492183000  
H -0.757323000 -2.910288000 0.022076000  
C -3.839405000 -2.147865000 -1.175901000  
H -4.289326000 -0.461164000 -2.435355000  
H -3.077498000 -3.752467000 0.042427000  
H -4.860112000 -2.521206000 -1.173951000

There is one imaginary frequency =  $-1216.22 \text{ cm}^{-1}$ .

SCF energy =  $-1114.189062$  hartree (M06/6-31G(d,p))

SCF energy =  $-1114.526228$  hartree (IEFPCM(CH<sub>2</sub>Cl<sub>2</sub>)-M06/6-311++G(2d,2p)//M06/6-31G(d,p))

Zero-point correction =  $+0.405340$  hartree

Energy correction =  $+0.429687$  hartree

Enthalpy correction =  $+0.430632$  hartree

Gibbs Free Energy correction =  $+0.350972$  hartree

## References

- (1) Flachsbarth, B.; Fritzsche, M.; Weldon, P. J.; Schulz, S. *Chem. Biodivers.* **2009**, *6*, 1–37. doi:10.1002/cbdv.200800265
- (2) Cacciuttolo, B.; Poulain-Martini, S.; Fontaine-Vive, F.; Abdo, M. A. H.; El-Kashef, H.; Duñach, E. *Eur. J. Org. Chem.* **2014**, *2014*, 7458–7468. doi:10.1002/ejoc.201402972
- (3) Dolomanov, O. V.; Bourhis, L. J.; Gildea, R. J.; Howard, J. a. K.; Puschmann, H. *J. Appl. Crystallogr.* **2009**, *42*, 339–341. doi:10.1107/S0021889808042726
- (4) Sheldrick, G. M. *Acta Crystallogr. Sect. Found. Adv.* **2015**, *71*, 3–8. doi:10.1107/S2053273314026370
- (5) Sheldrick, G. M. *Acta Crystallogr. Sect. C Struct. Chem.* **2015**, *71*, 3–8. doi:10.1107/S2053229614024218
- (6) Frisch, M. J.; Trucks, G. W.; Schlegel, H. B.; Scuseria, G. E.; Robb, M. A.; Cheeseman, J. R.; Scalmani, G.; Barone, V.; Petersson, G. A.; Nakatsuji, H.; Li, X.; Caricato, M.; Marenich, A. V.; Bloino, J.; Janesko, B. G.; Gomperts, R.; Mennucci, B.; Hratchian, H. P.; Ortiz, J. V.; Izmaylov, A. F.; Sonnenberg, J. L.; Williams-Young, D.; Ding, F.; Lipparini, F.; Egidi, F.; Goings, J.; Peng, B.; Petrone, A.; Henderson, T.; Ranasinghe, D.; Zakrzewski, V. G.; Gao, J.; Rega, N.; Zheng, G.; Liang, W.; Hada, M.; Ehara, M.; Toyota, K.; Fukuda, R.; Hasegawa, J.; Ishida, M.; Nakajima, T.; Honda, Y.; Kitao, O.; Nakai, H.; Vreven, T.; Throssell, K.; Montgomery, J. A., Jr.; Peralta, J. E.; Ogliaro, F.; Bearpark, M. J.; Heyd, J. J.; Brothers, E. N.; Kudin, K. N.; Staroverov, V. N.; Keith, T. A.; Kobayashi, R.; Normand, J.; Raghavachari, K.; Rendell, A. P.; Burant, J. C.; Iyengar, S. S.; Tomasi, J.; Cossi, M.; Millam, J. M.; Klene, M.; Adamo, C.; Cammi, R.; Ochterski, J. W.; Martin, R. L.; Morokuma, K.; Farkas, O.; Foresman, J. B.; Fox, D. J. *Gaussian, Inc., Wallingford CT, Gaussian 16, Revision C.01*; 2016
- (7) Zhao, Y.; Truhlar, D. G. *Theor. Chem. Acc.* **2008**, *120*, 215–241. doi:10.1007/s00214-007-0310-x

# Copies of spectra

## Diethyl (3-methylbut-2-enyl)malonate (S1)

$^1\text{H}$  NMR (400 MHz,  $\text{CDCl}_3$ )

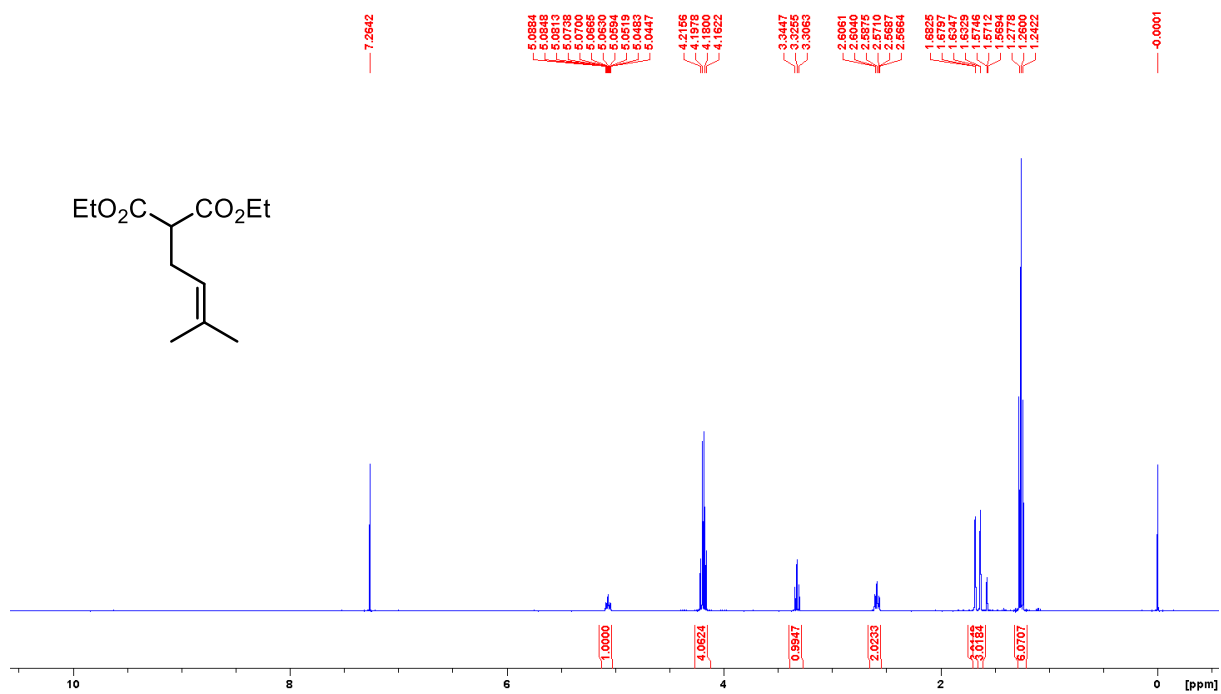

$^{13}\text{C}\{^1\text{H}\}$  NMR (100 MHz,  $\text{CDCl}_3$ )

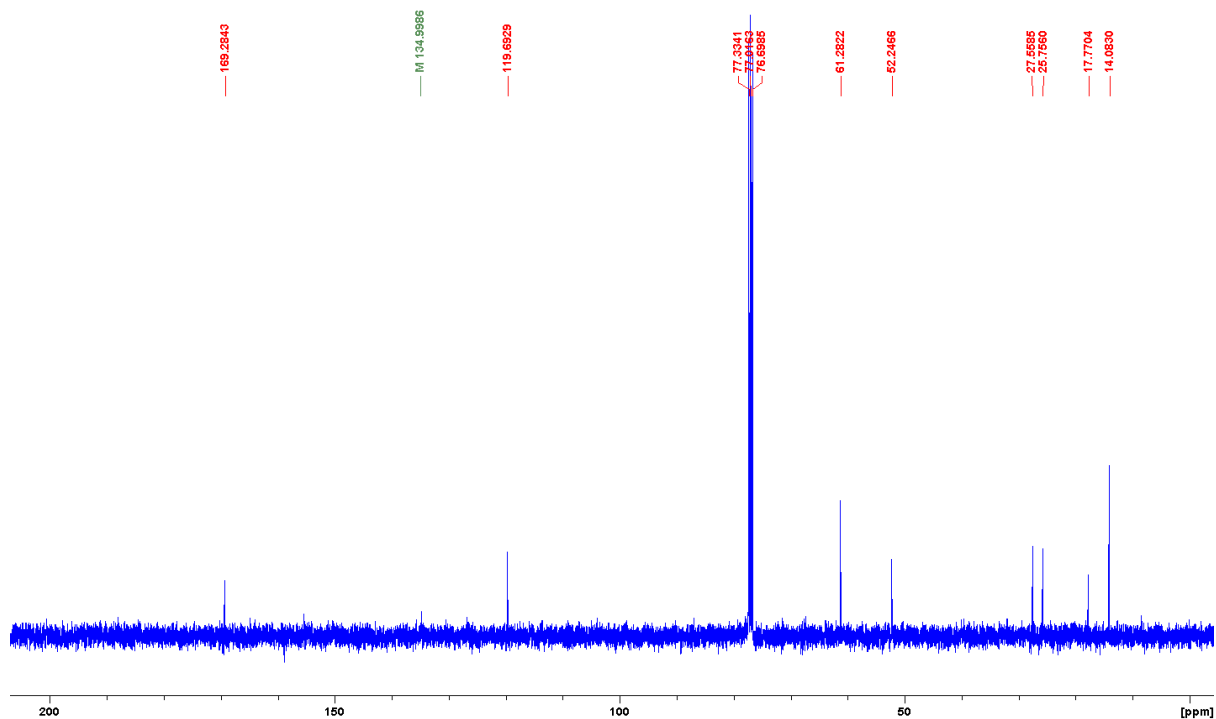

# Diethyl benzyl(3-methylbut-2-enyl)malonate (1)

$^1\text{H}$  NMR (400 MHz,  $\text{CDCl}_3$ )

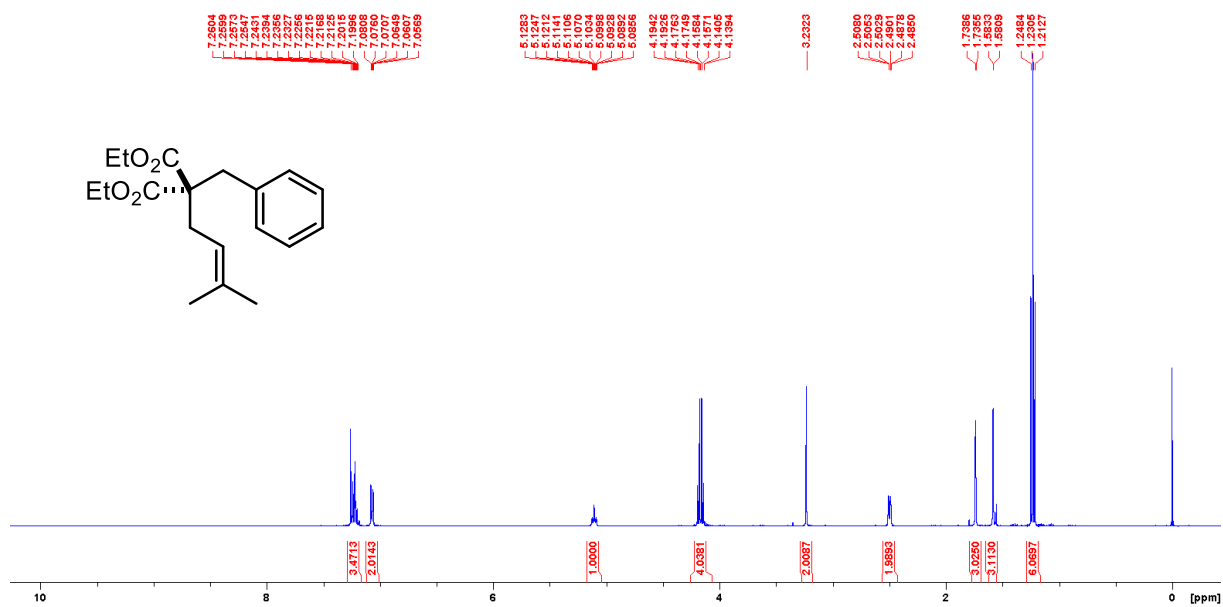

$^{13}\text{C}\{^1\text{H}\}$  NMR (100 MHz,  $\text{CDCl}_3$ )

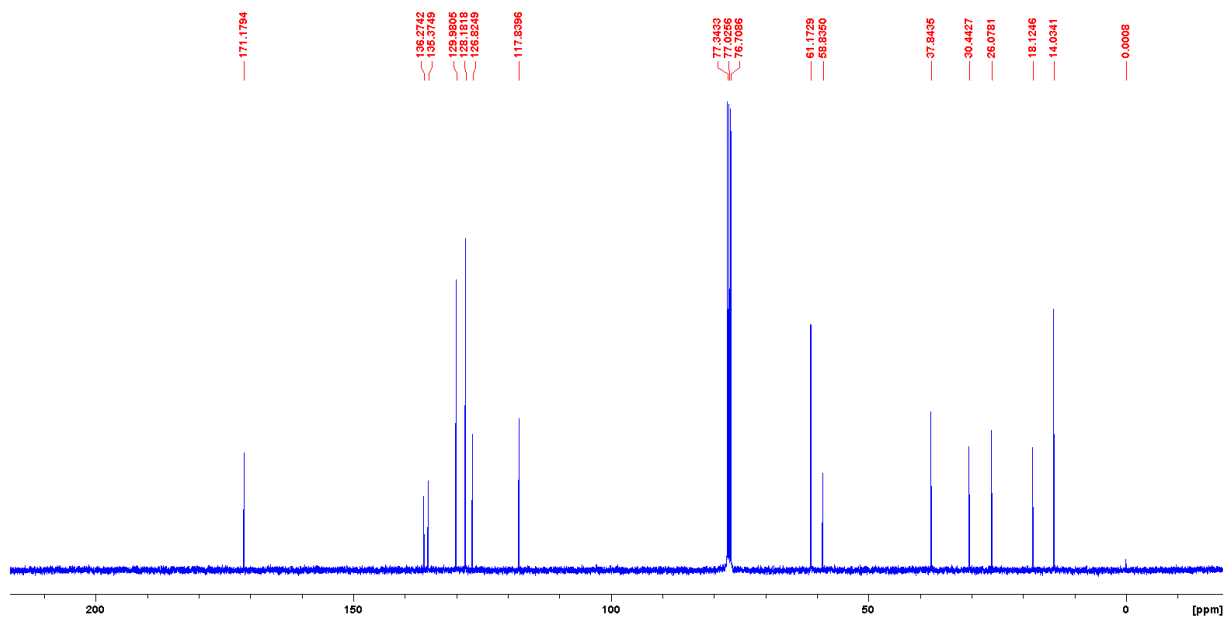

# Diethyl (1*H*)naphthalene-2,2-dicarboxylate (4)

<sup>1</sup>H NMR (400 MHz, CDCl<sub>3</sub>)

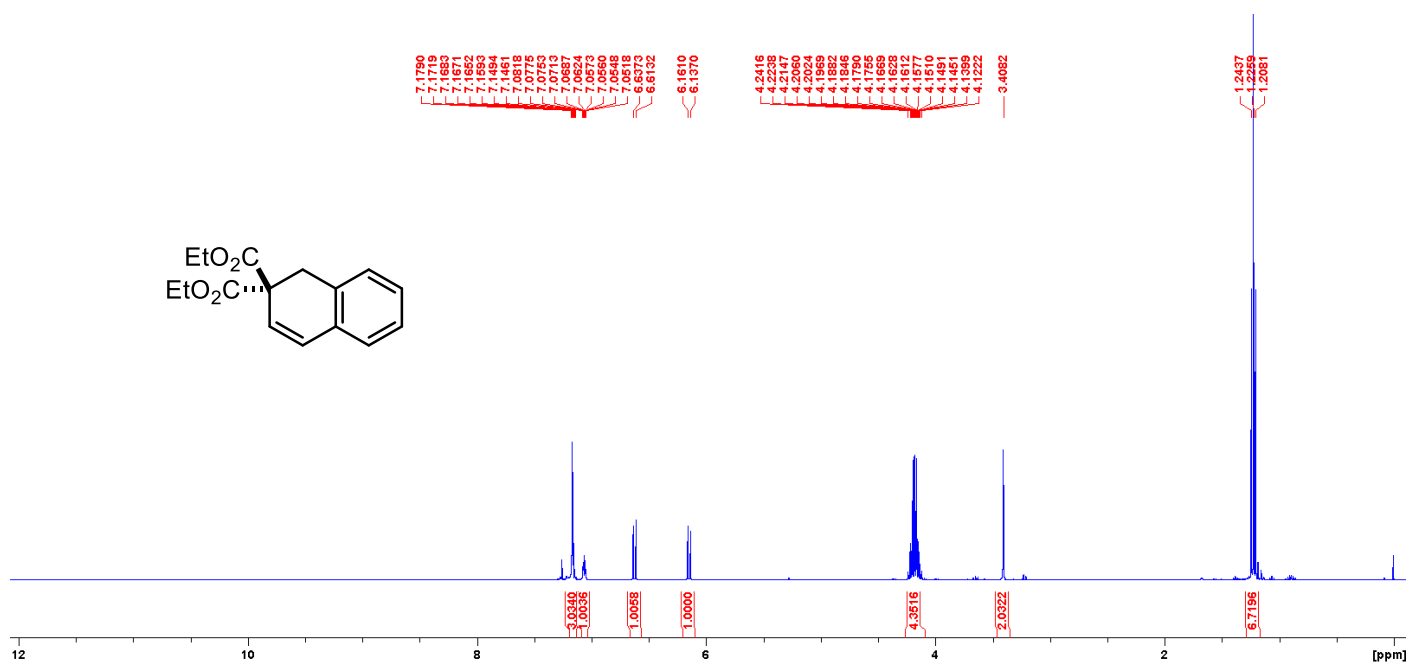

<sup>13</sup>C{<sup>1</sup>H} NMR (100 MHz, CDCl<sub>3</sub>)

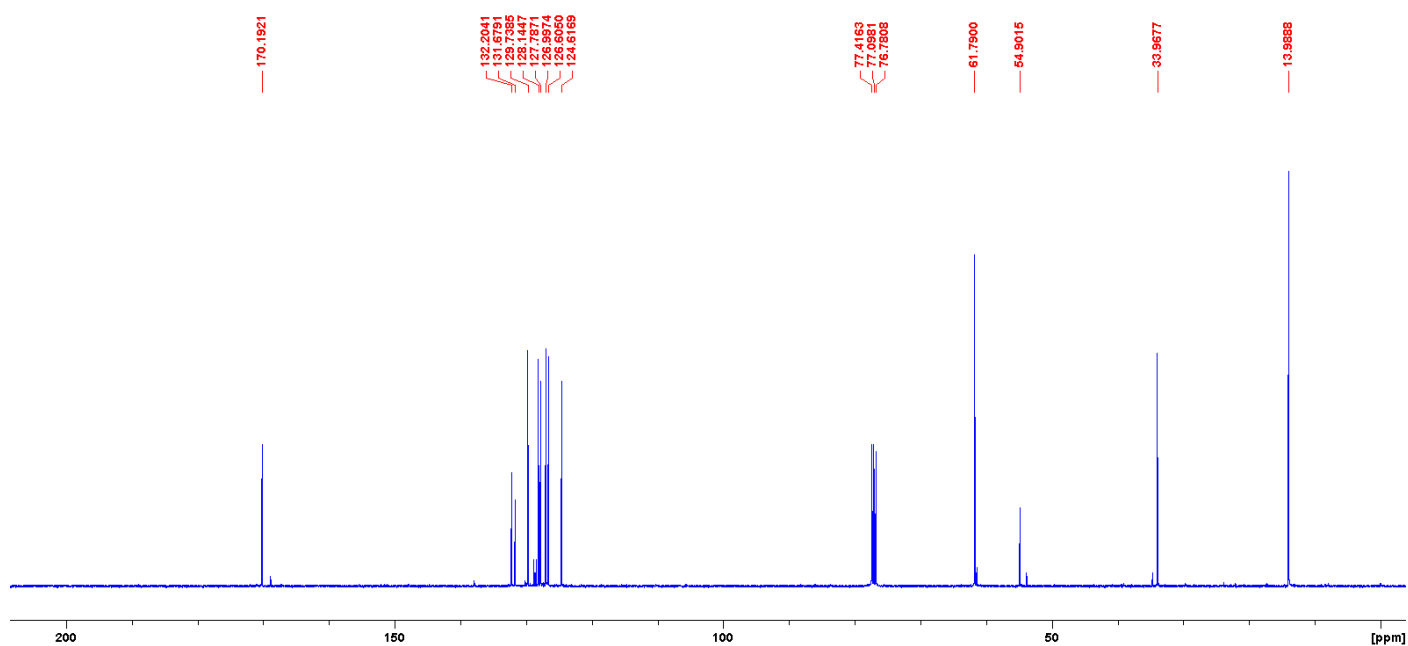



# 3,3-Bis(ethoxycarbonyl)-1-(2,4,6-trimethoxyphenyl)-1,2,3,4-tetrahydronaphthalene (6)

$^1\text{H}$  NMR (400 MHz,  $\text{CDCl}_3$ )

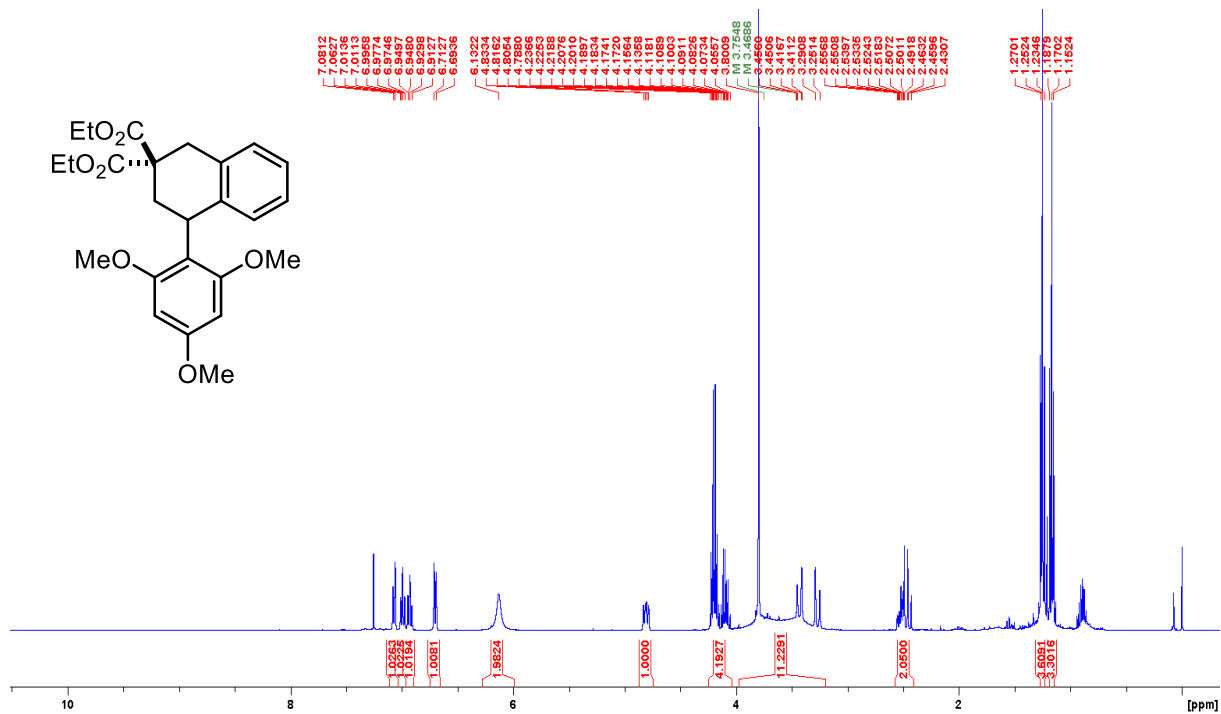

$^{13}\text{C}\{^1\text{H}\}$  NMR (100 MHz,  $\text{CDCl}_3$ )

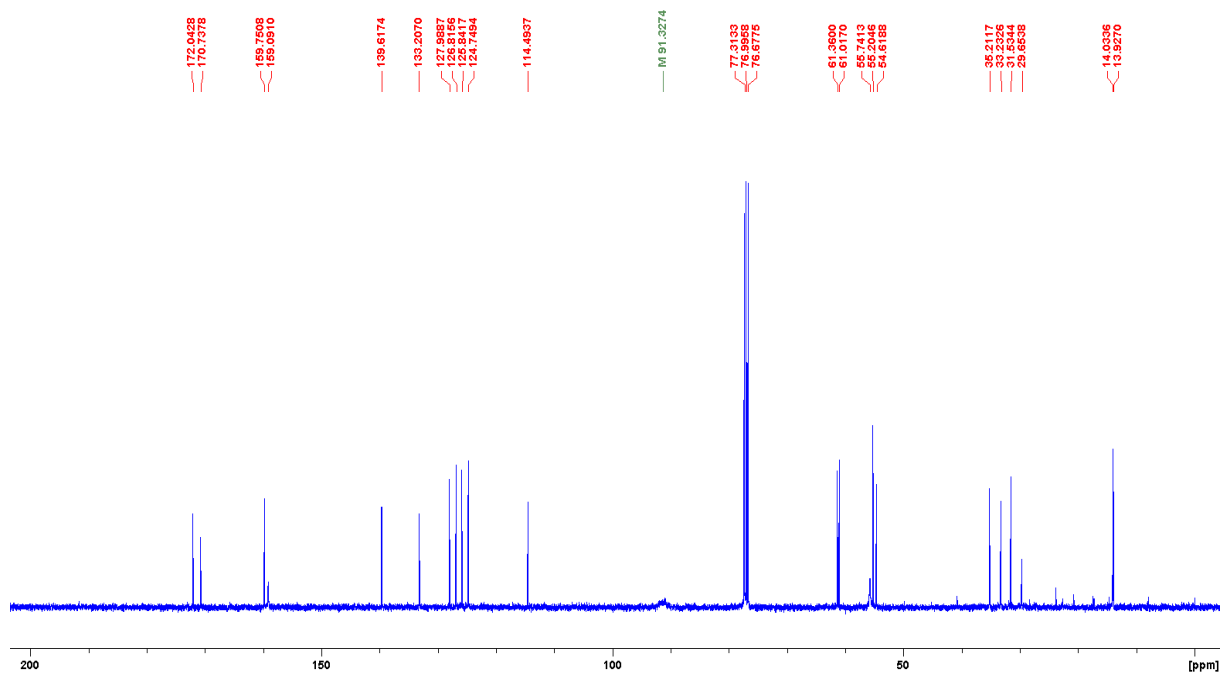

# Diethyl (2-methylbenzyl)(3-methylbut-2-enyl)malonate (11a)

$^1\text{H}$  NMR (400 MHz,  $\text{CDCl}_3$ )

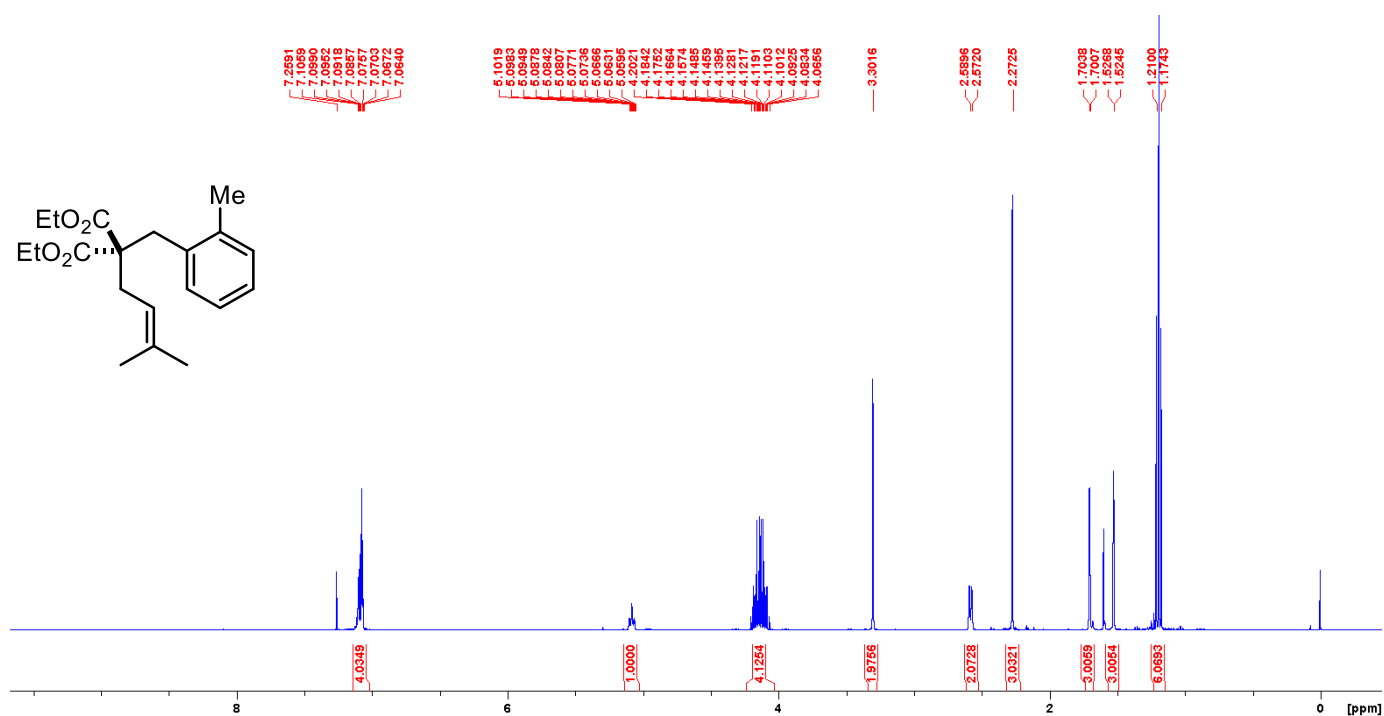

$^{13}\text{C}\{^1\text{H}\}$  NMR (100 MHz,  $\text{CDCl}_3$ )

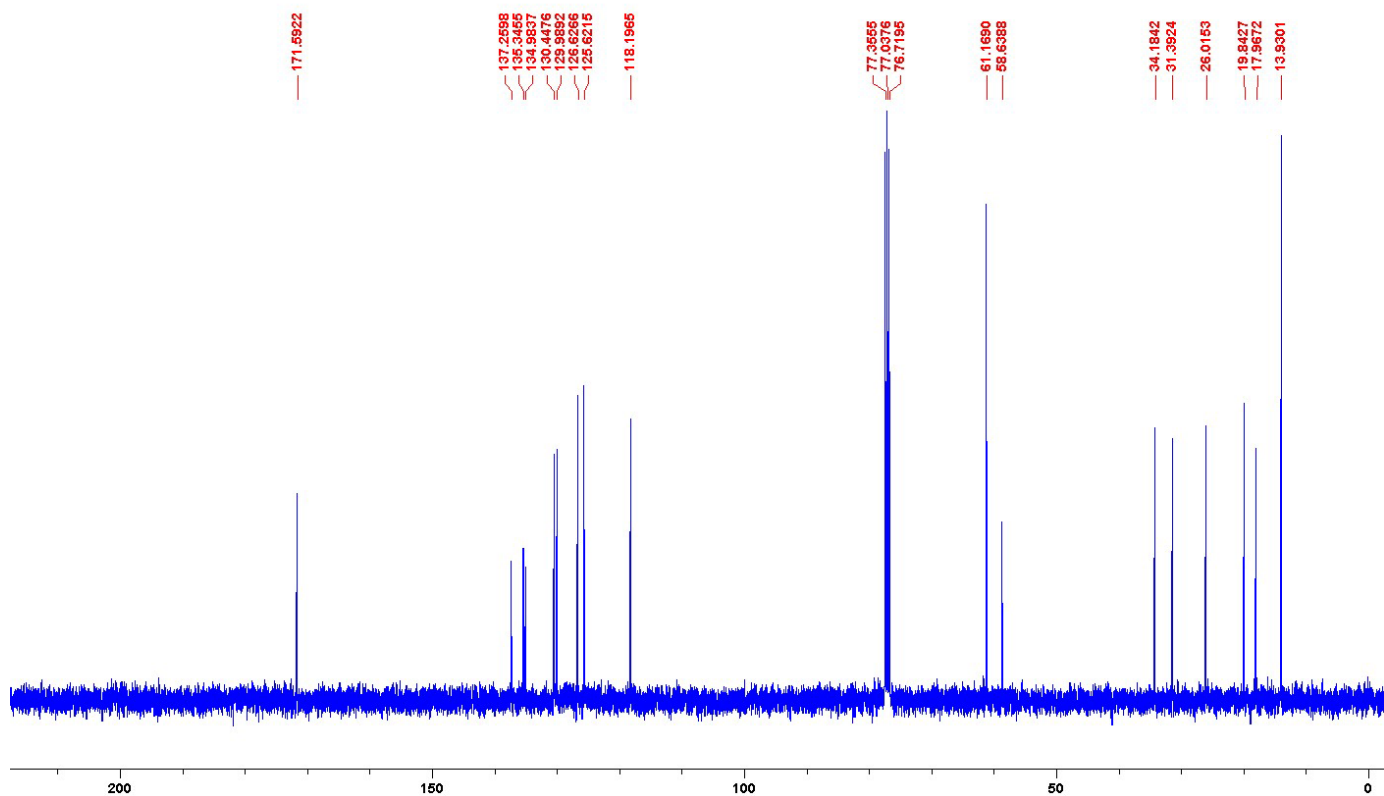

# Diethyl (2-fluorobenzyl)(3-methylbut-2-enyl)malonate (11b)

$^1\text{H}$  NMR (400 MHz,  $\text{CDCl}_3$ )

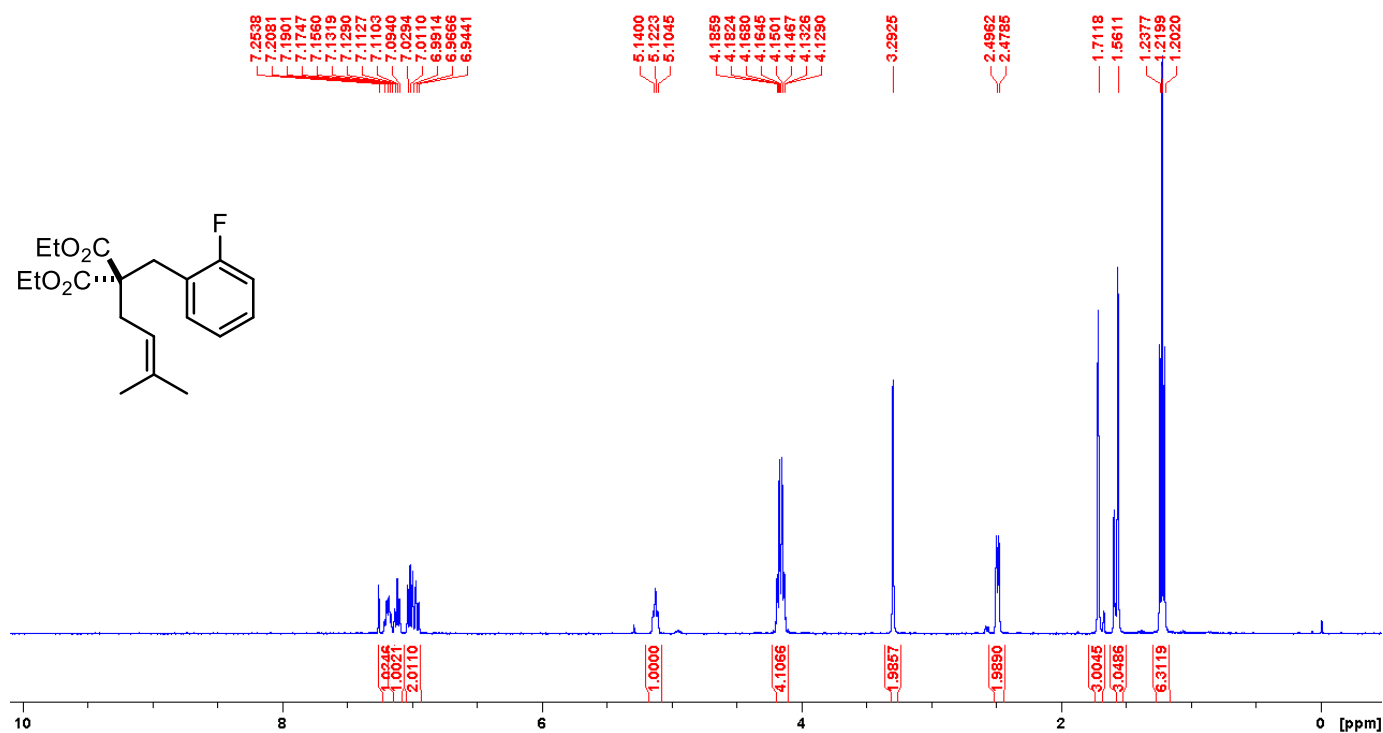

$^{13}\text{C}\{^1\text{H}\}$  NMR (100 MHz,  $\text{CDCl}_3$ )

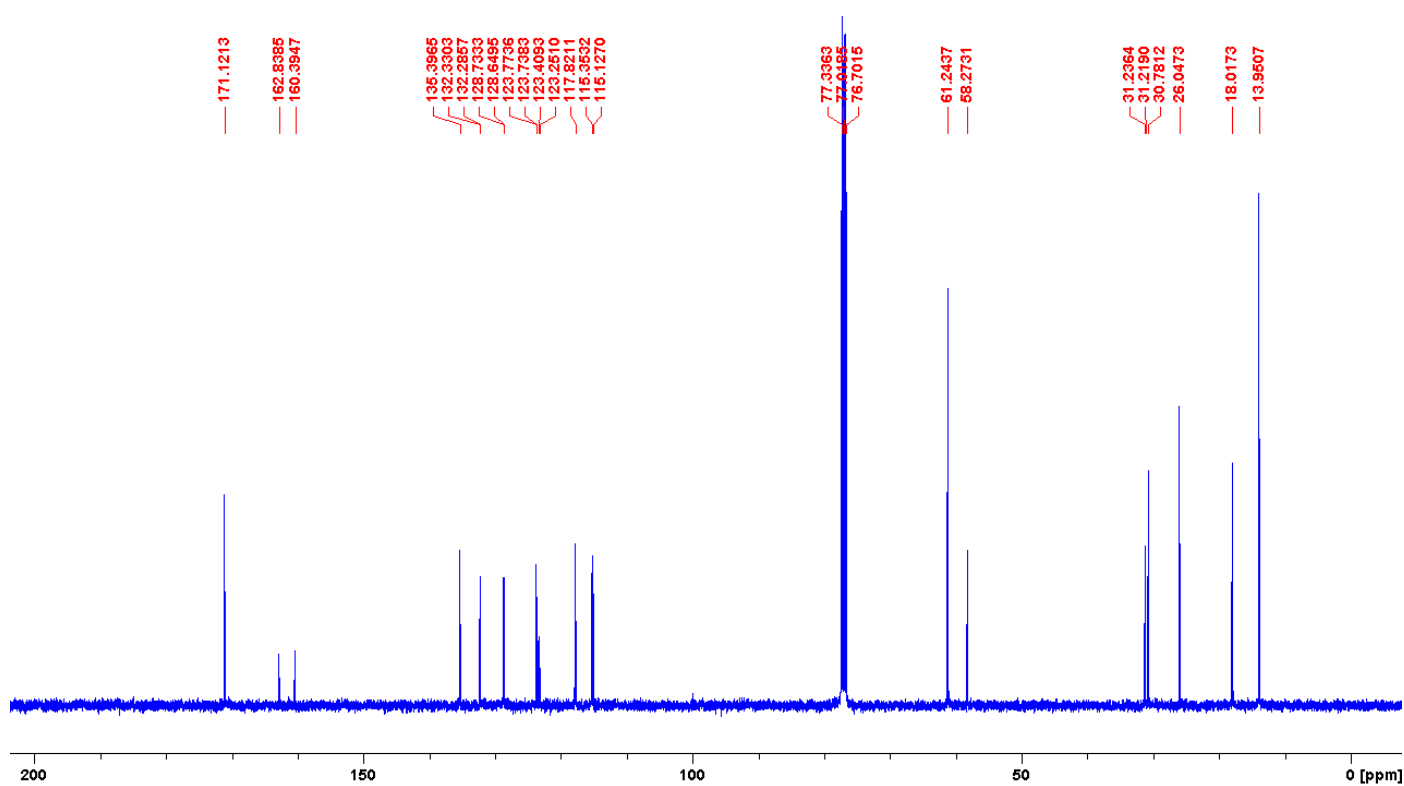

# Diethyl (2-chlorobenzyl)(3-methylbut-2-enyl)malonate (11c)

$^1\text{H}$  NMR (400 MHz,  $\text{CDCl}_3$ )

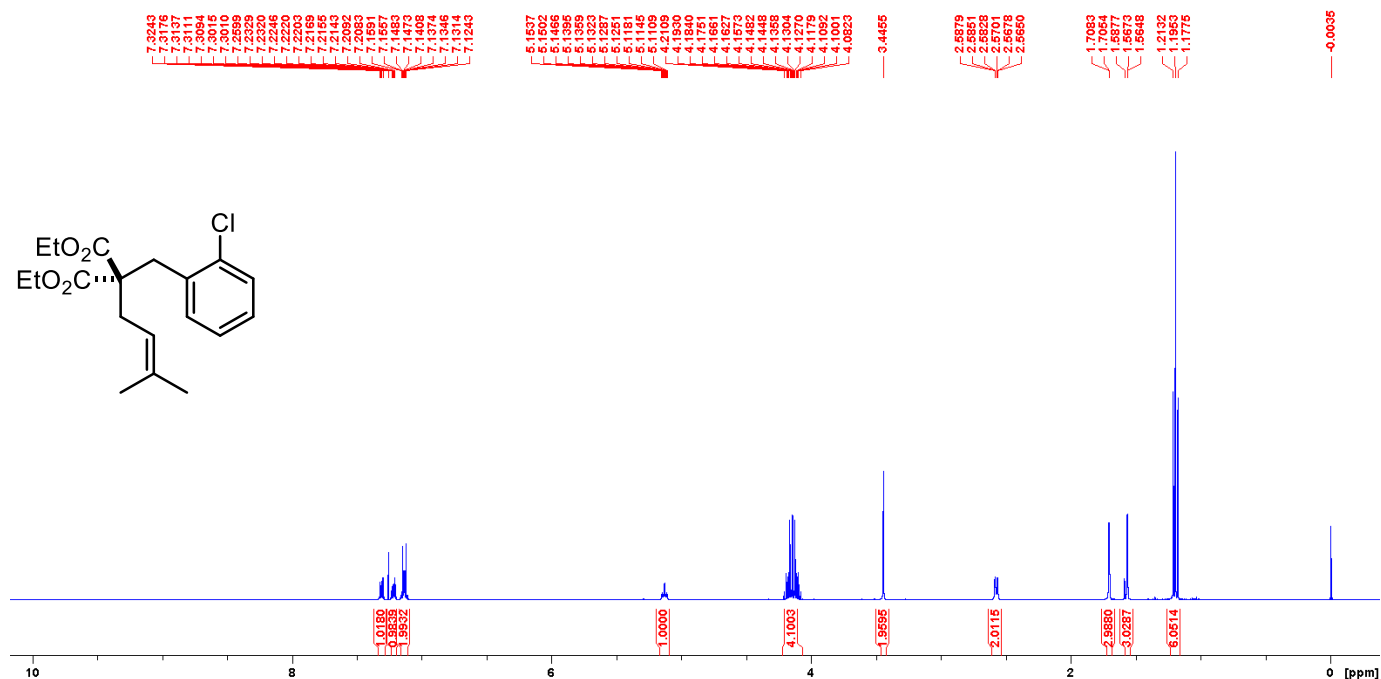

$^{13}\text{C}\{^1\text{H}\}$  NMR (100 MHz,  $\text{CDCl}_3$ )

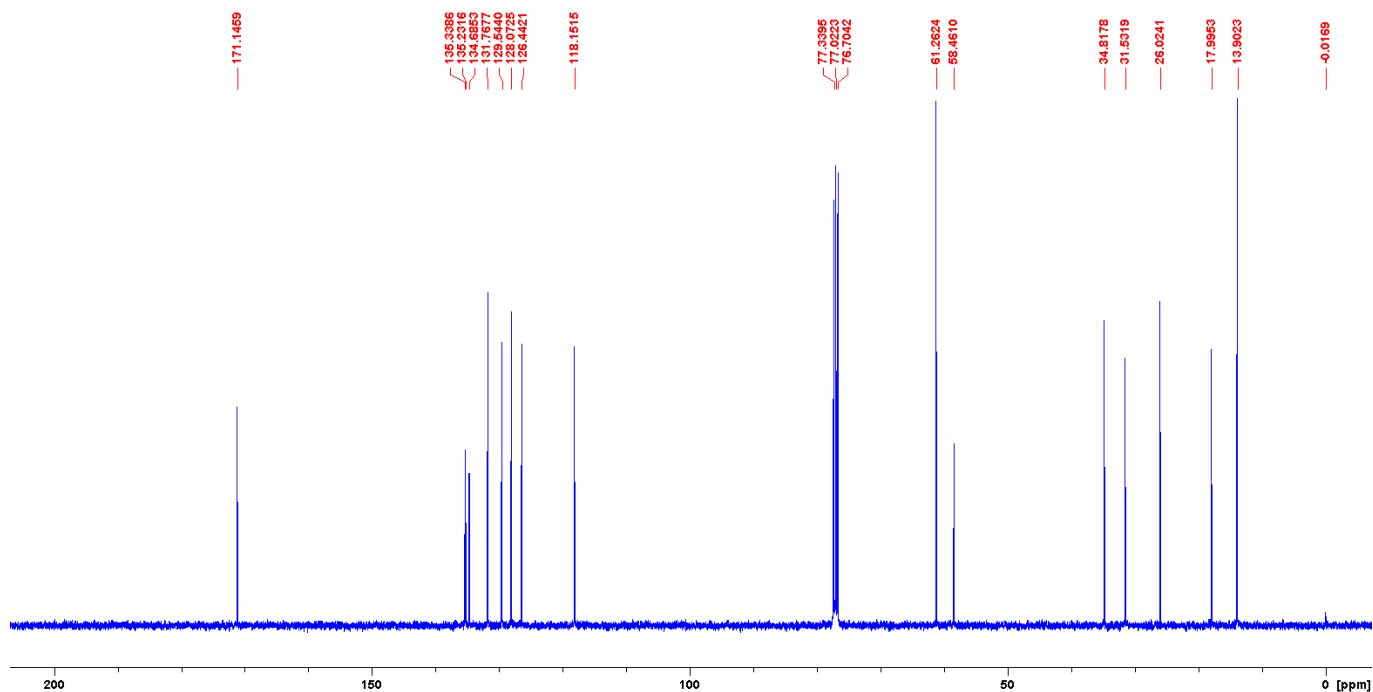

# Diethyl (2-methoxybenzyl)(3-methylbut-2-enyl)malonate (11d)

$^1\text{H}$  NMR (400 MHz,  $\text{CDCl}_3$ )

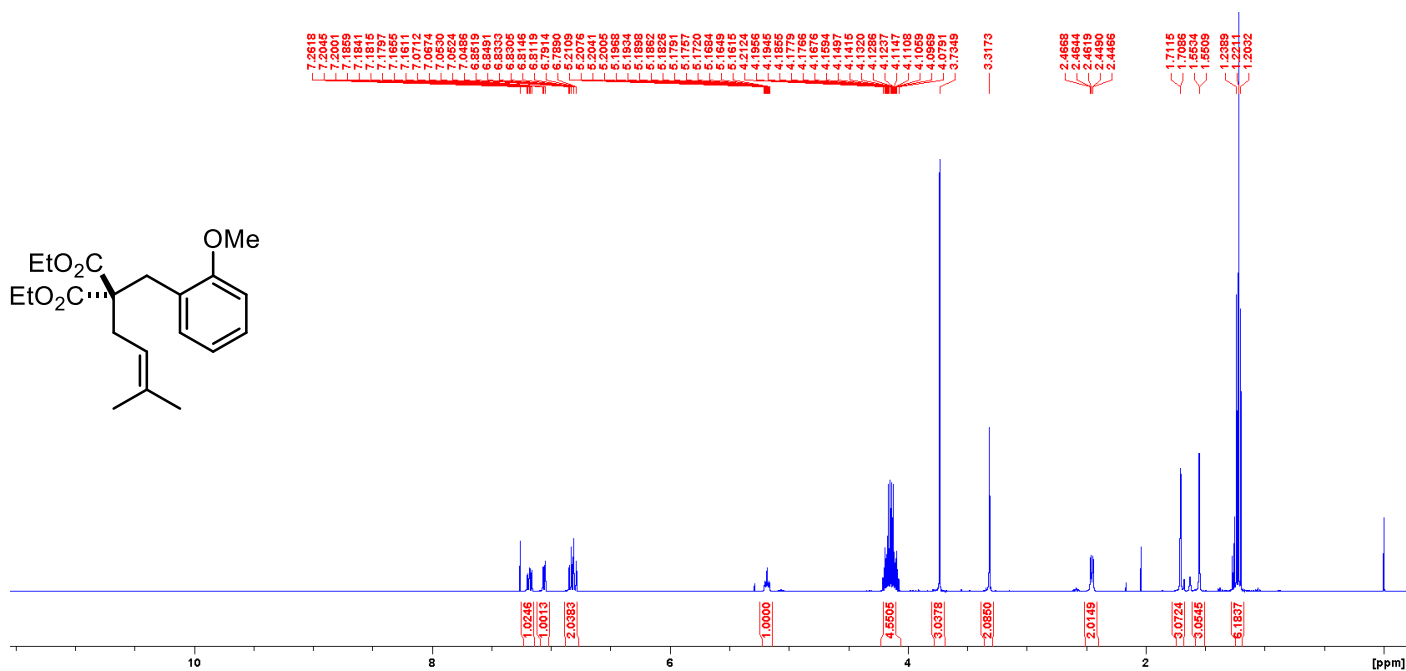

$^{13}\text{C}\{^1\text{H}\}$  NMR (100 MHz,  $\text{CDCl}_3$ )

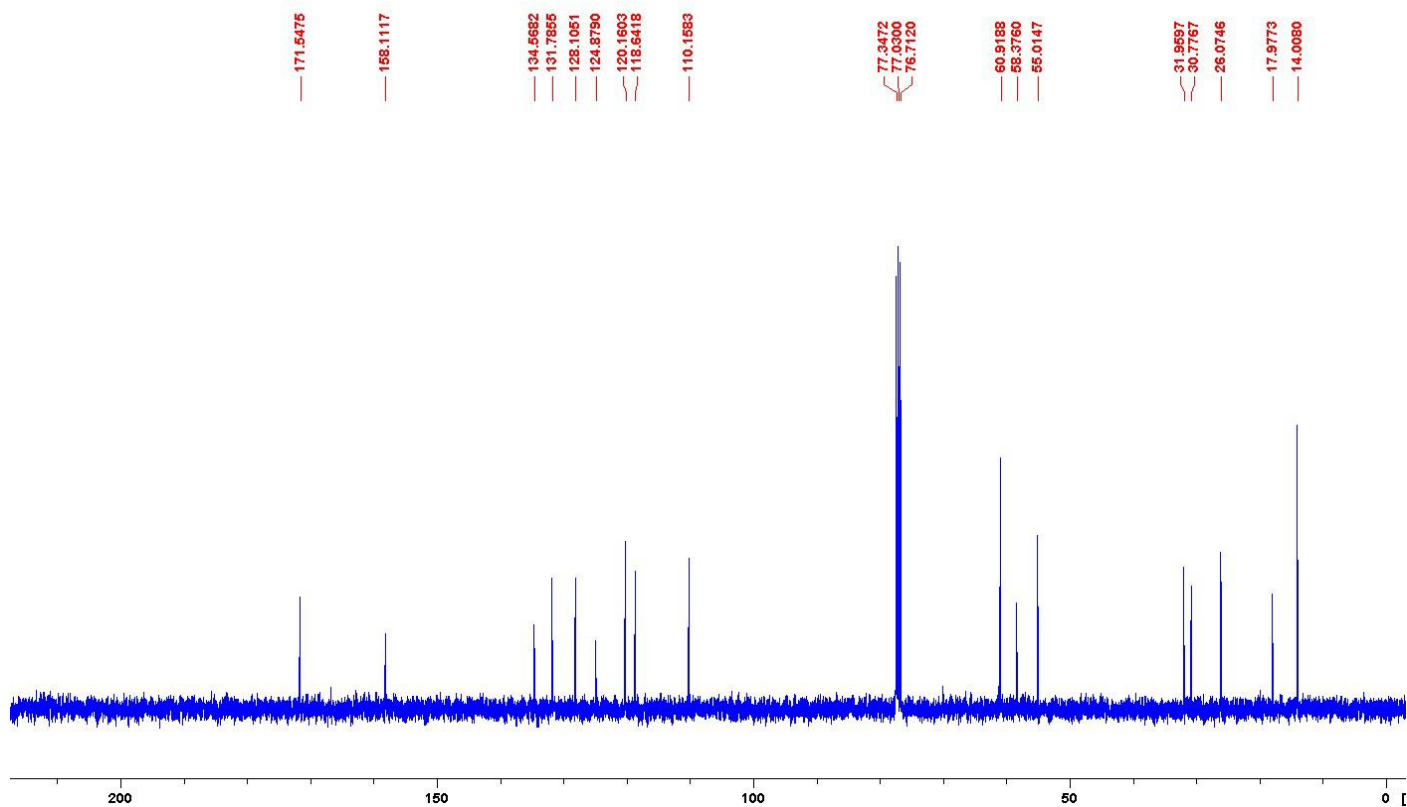

# Diethyl (3-methylbenzyl)(3-methylbut-2-enyl)malonate (11e)

$^1\text{H}$  NMR (400 MHz,  $\text{CDCl}_3$ )

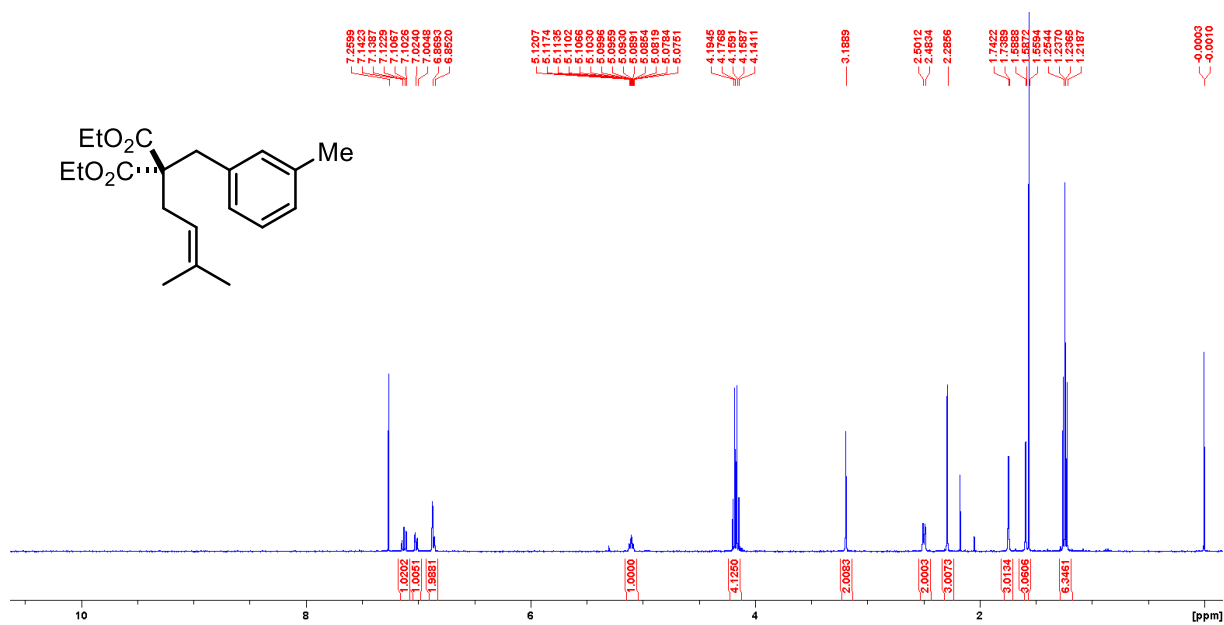

$^{13}\text{C}\{^1\text{H}\}$  NMR (100 MHz,  $\text{CDCl}_3$ )

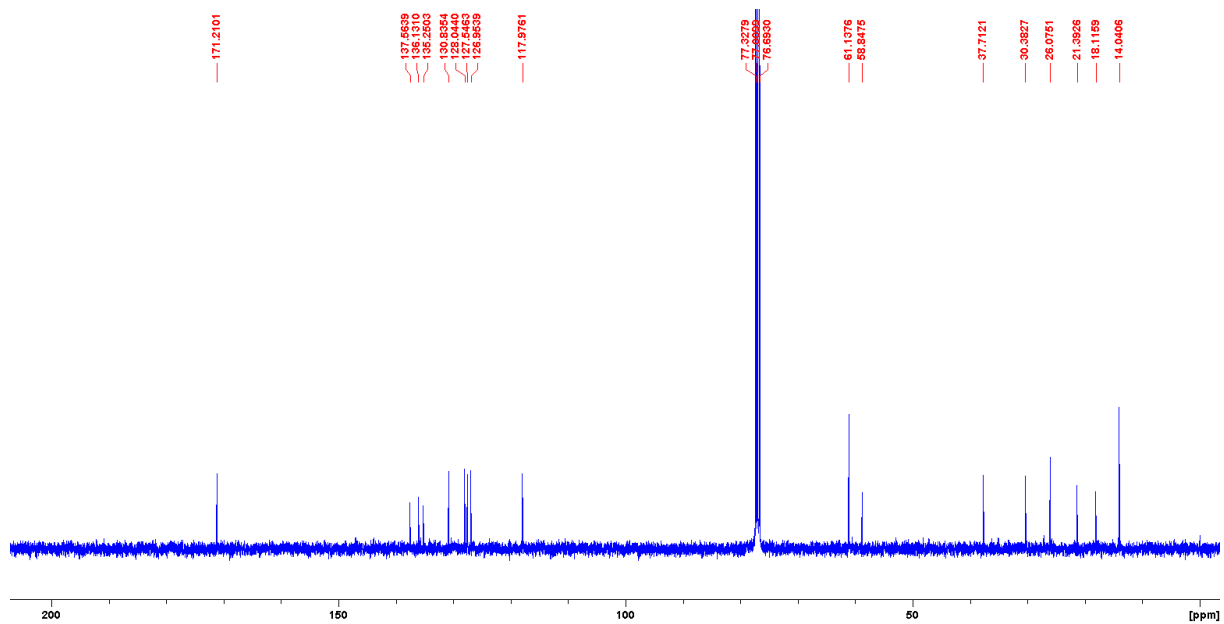

# Diethyl (3-fluorobenzyl)(3-methylbut-2-enyl)malonate (11f)

$^1\text{H}$  NMR (400 MHz,  $\text{CDCl}_3$ )

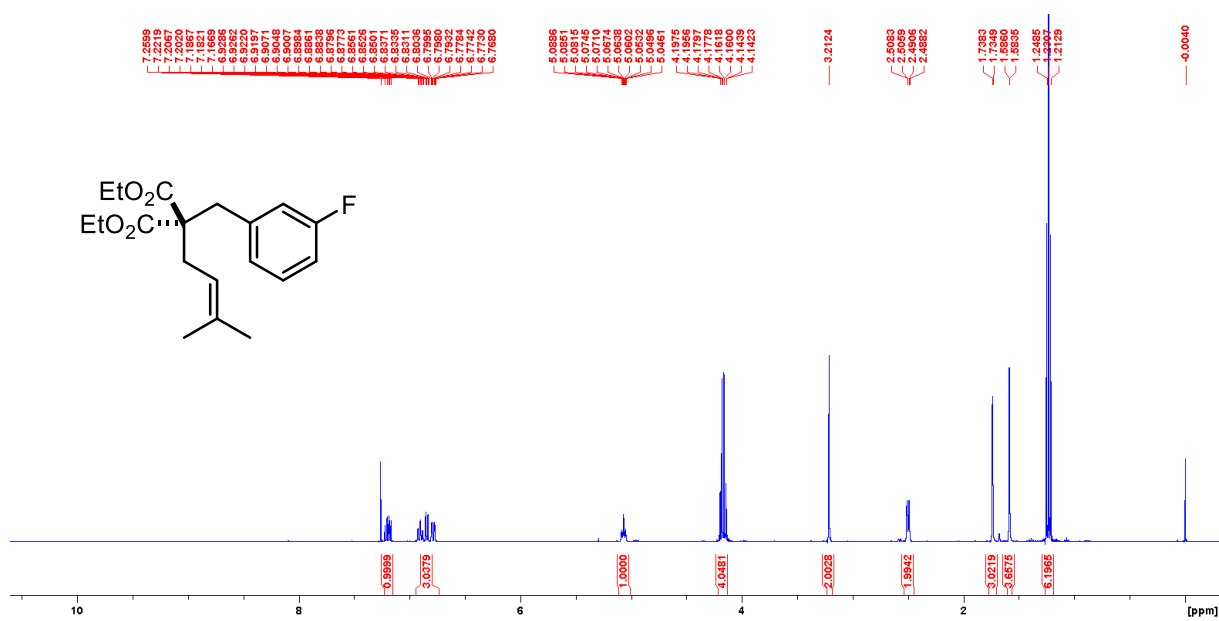

$^{13}\text{C}\{^1\text{H}\}$  NMR (100 MHz,  $\text{CDCl}_3$ )

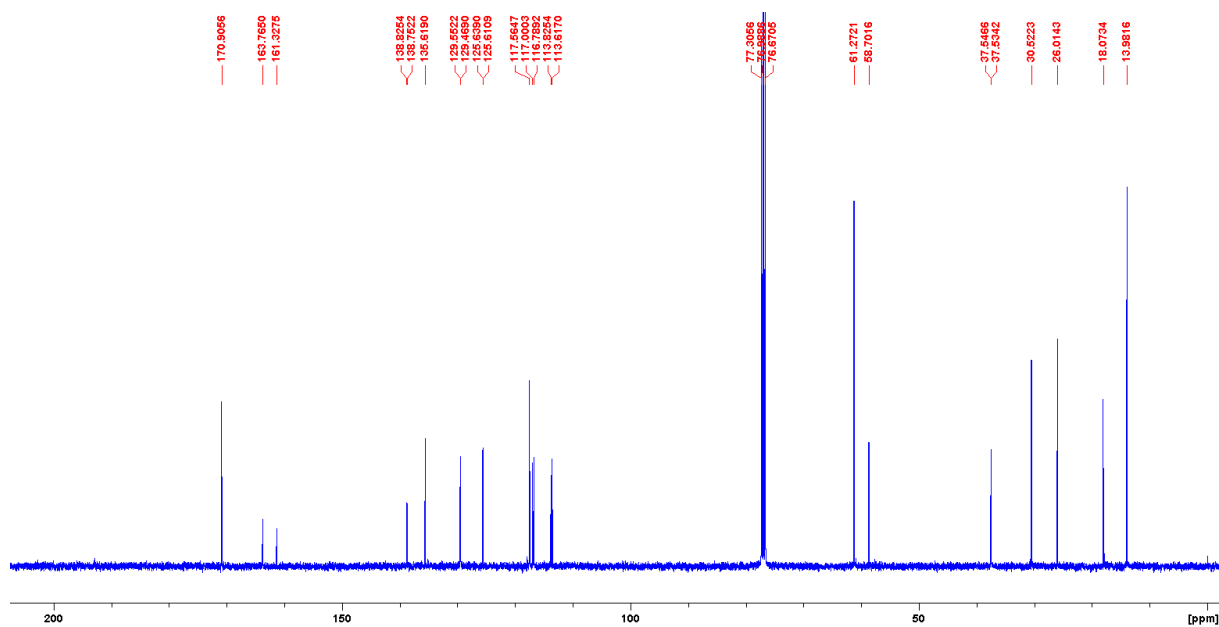

# Diethyl (3-chlorobenzyl)(3-methylbut-2-enyl)malonate (11g)

$^1\text{H}$  NMR (400 MHz,  $\text{CDCl}_3$ )

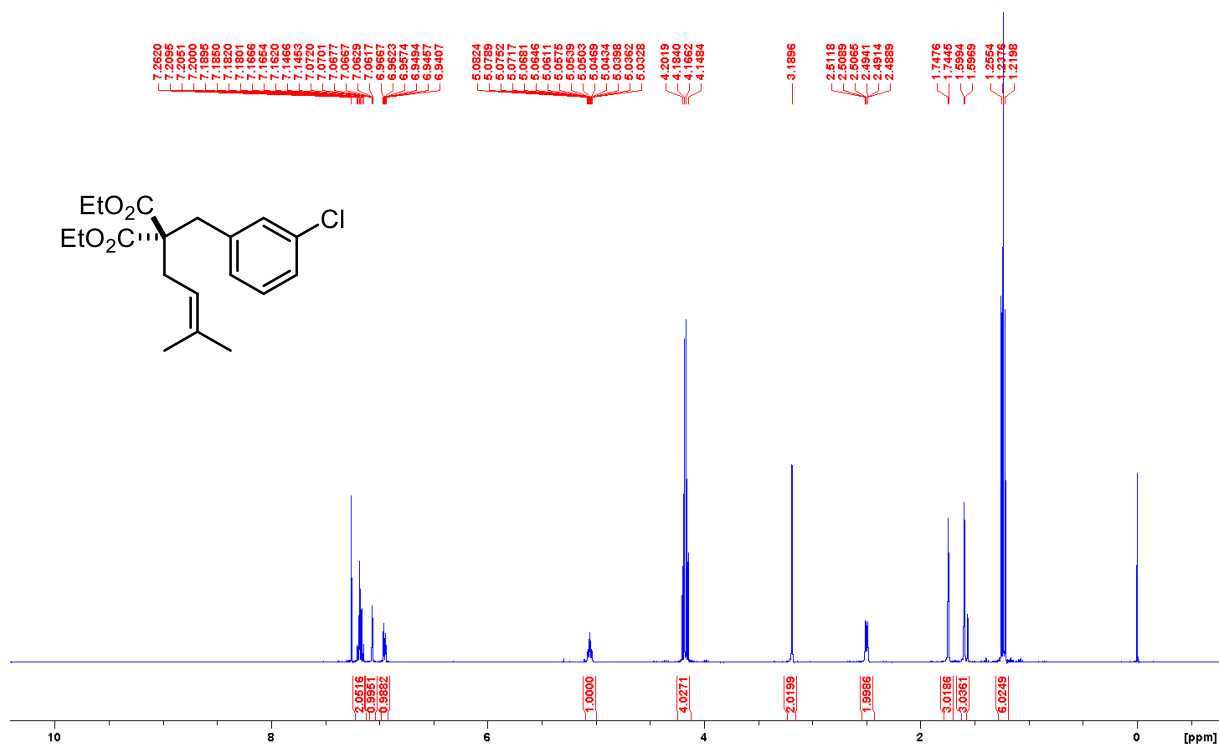

$^{13}\text{C}\{^1\text{H}\}$  NMR (100 MHz,  $\text{CDCl}_3$ )

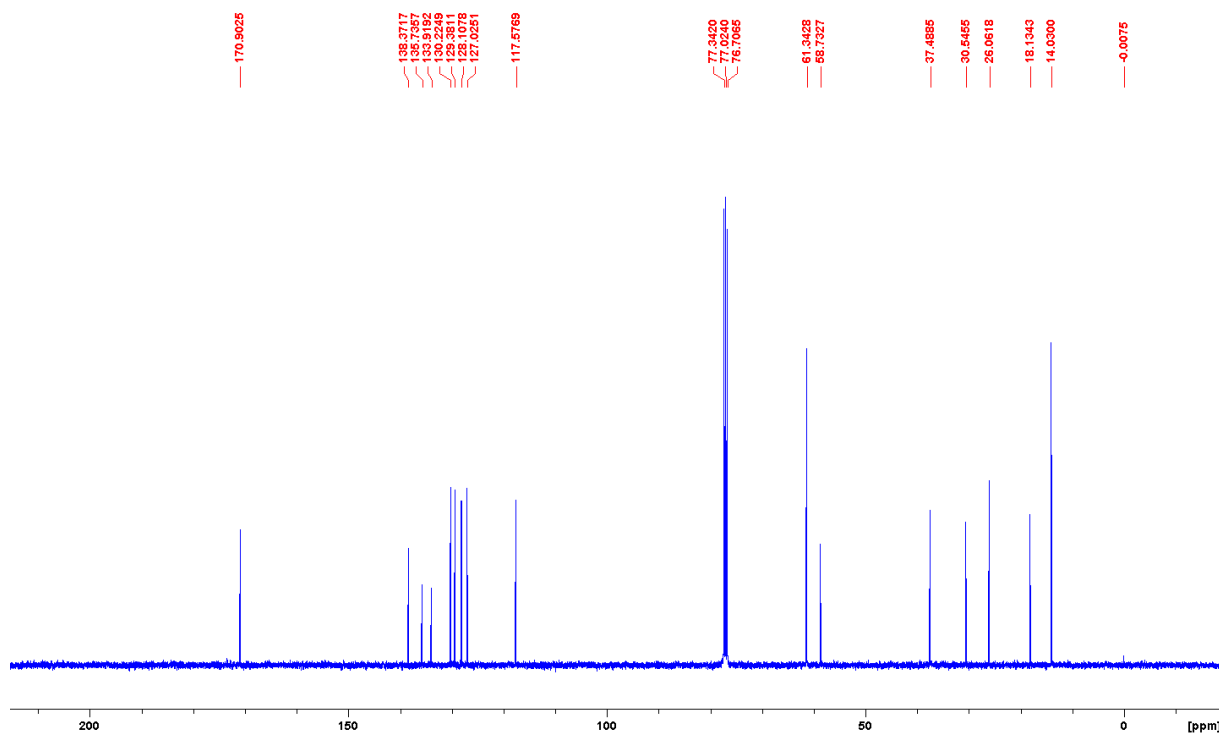



# Diethyl (3-bromobenzyl)(3-methylbut-2-enyl)malonate (11h)

$^1\text{H}$  NMR (400 MHz,  $\text{CDCl}_3$ )

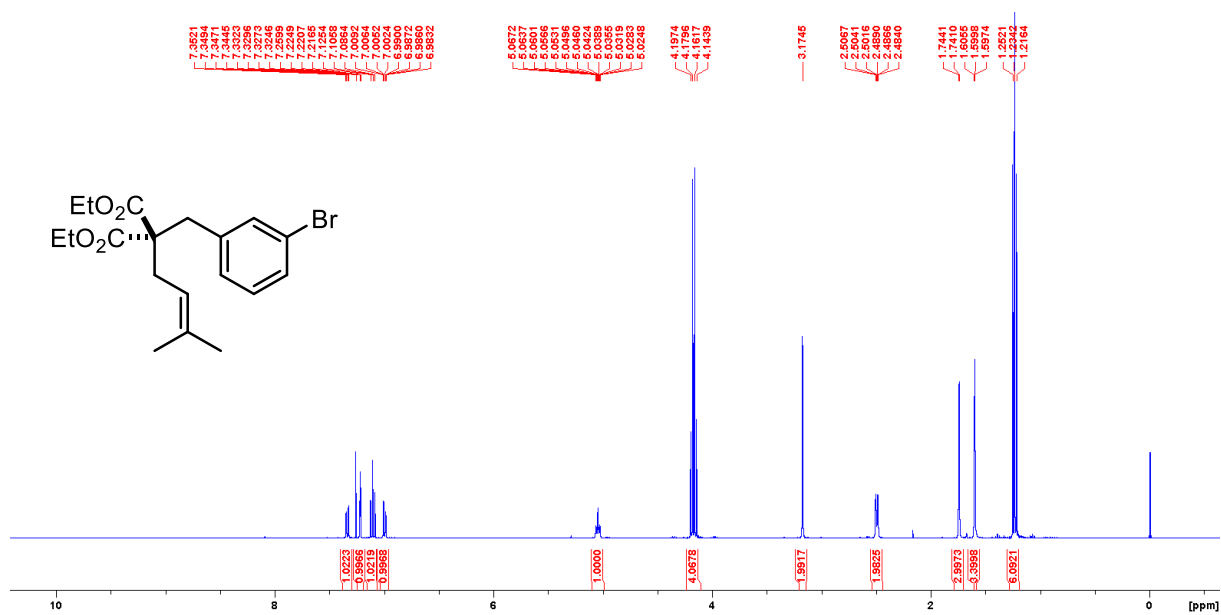

$^{13}\text{C}\{^1\text{H}\}$  NMR (100 MHz,  $\text{CDCl}_3$ )

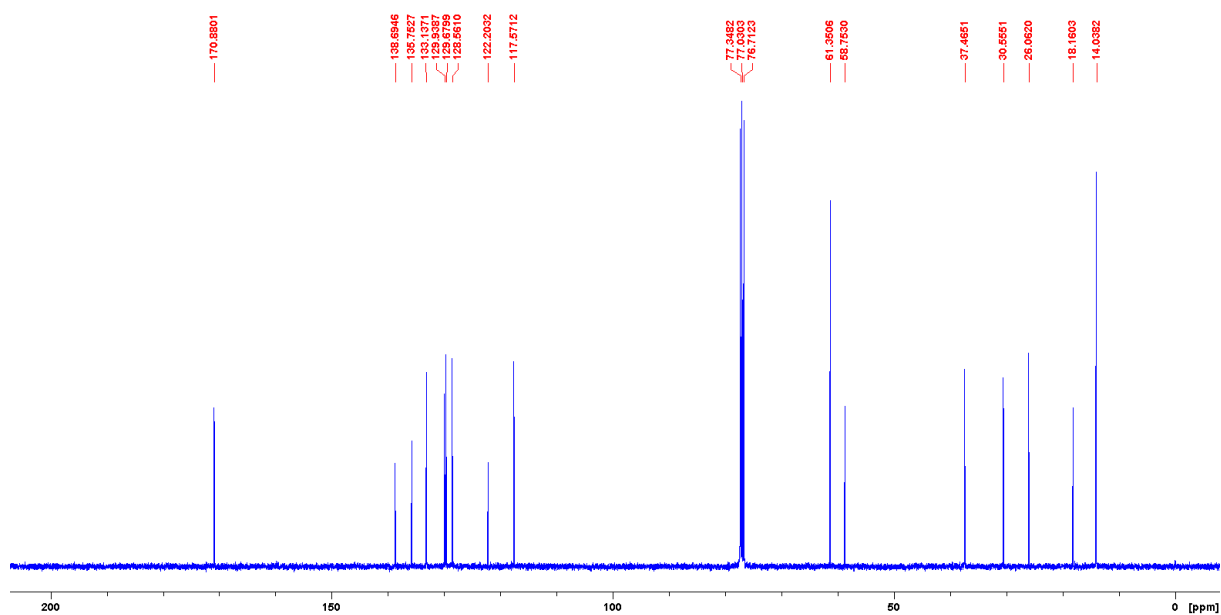

# Diethyl (3-methoxybenzyl)(3-methylbut-2-enyl)malonate (11i)

$^1\text{H}$  NMR (400 MHz,  $\text{CDCl}_3$ )

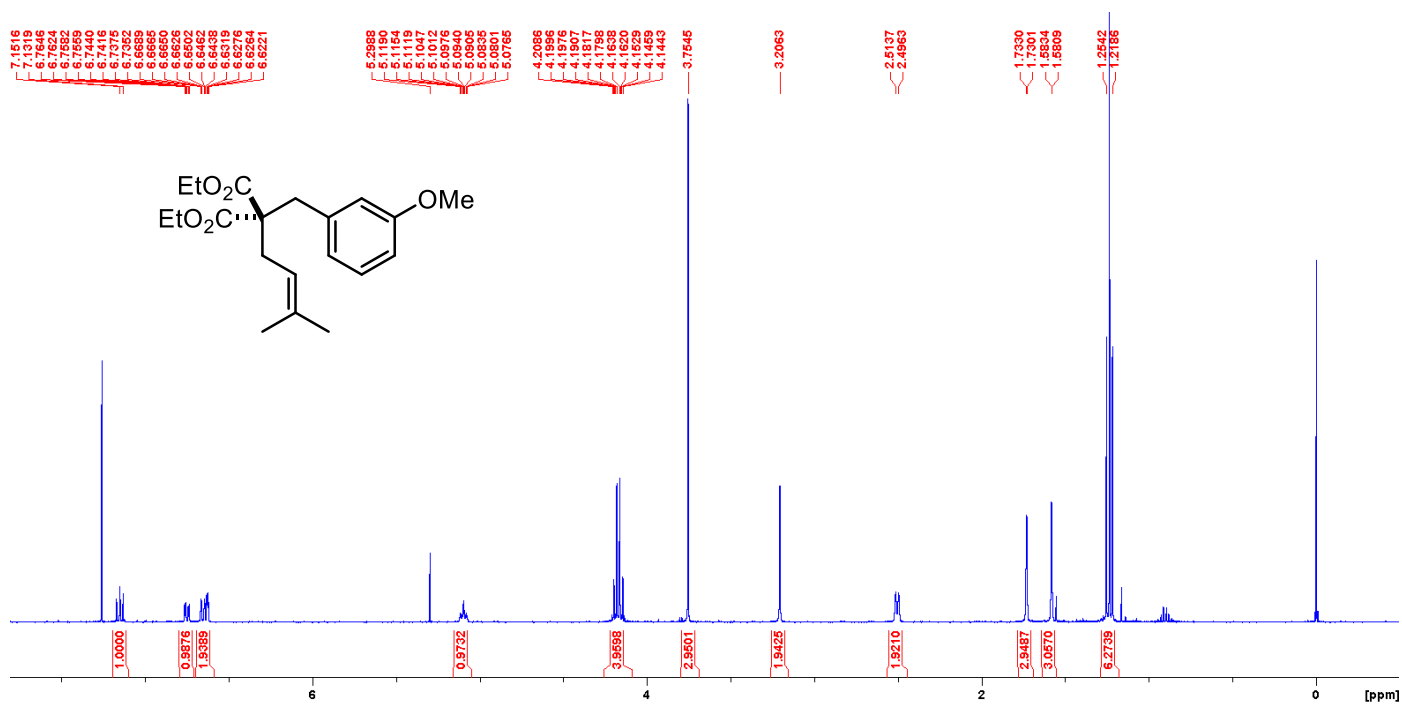

$^{13}\text{C}\{^1\text{H}\}$  NMR (100 MHz,  $\text{CDCl}_3$ )

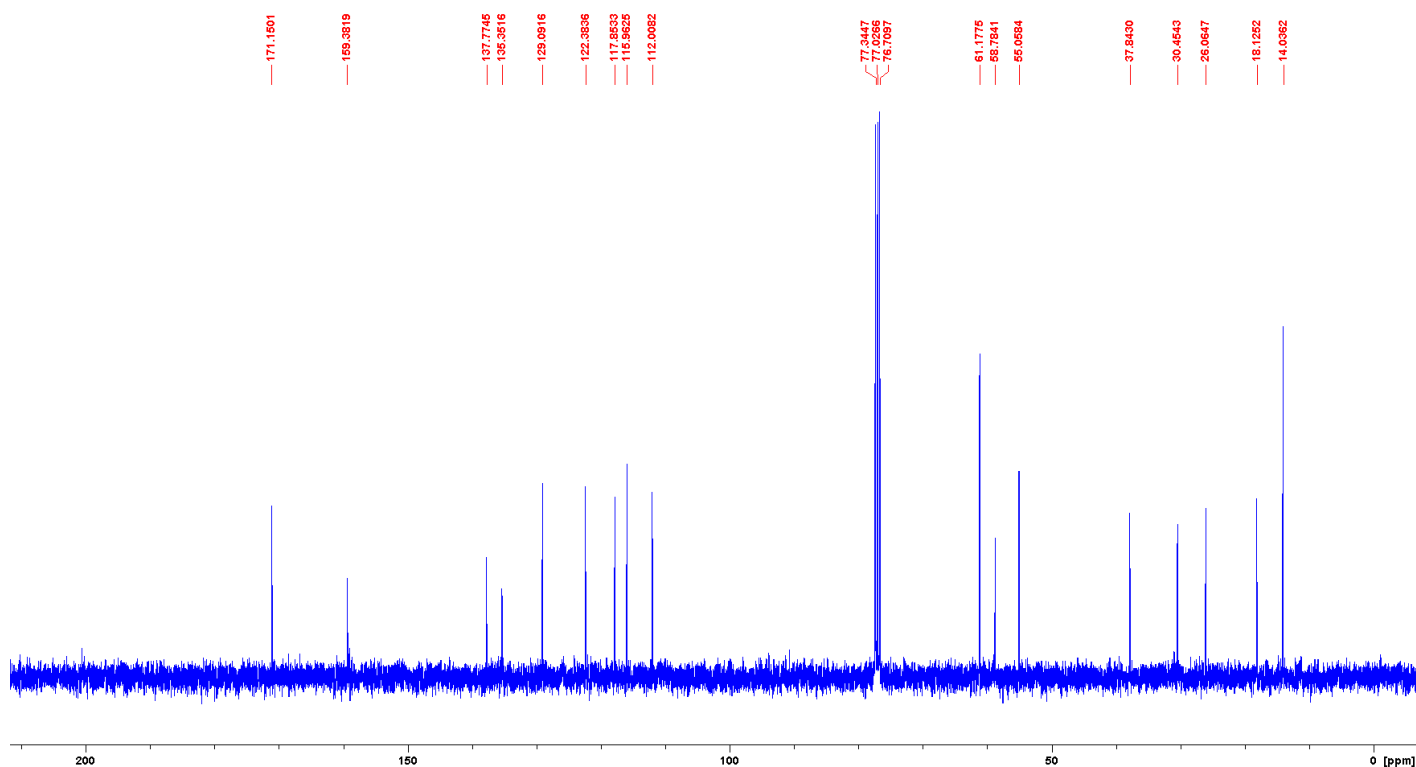

# Diethyl (4-bromobenzyl)(3-methylbut-2-enyl)malonate (11j)

$^1\text{H}$  NMR (400 MHz,  $\text{CDCl}_3$ )

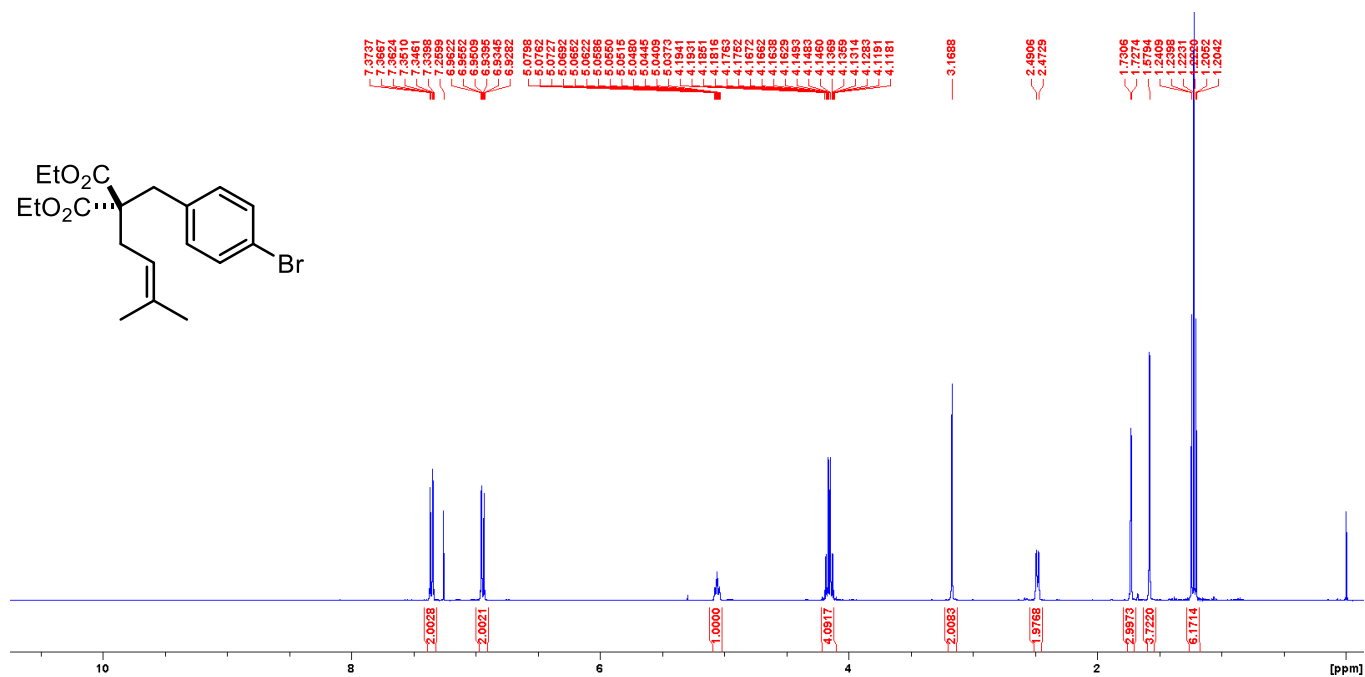

$^{13}\text{C}\{^1\text{H}\}$  NMR (100 MHz,  $\text{CDCl}_3$ )

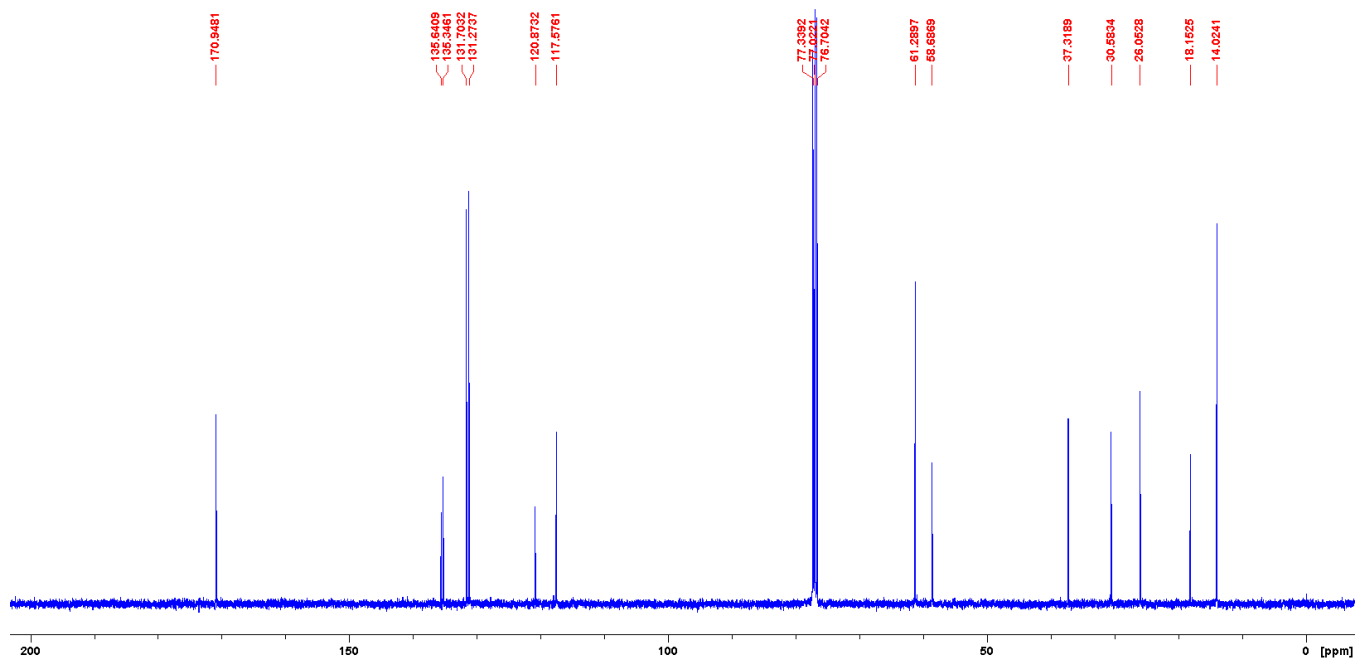

# Diethyl (4-methoxycarbonylbenzyl)(3-methylbut-2-enyl)malonate (11k)

$^1\text{H}$  NMR (400 MHz,  $\text{CDCl}_3$ )

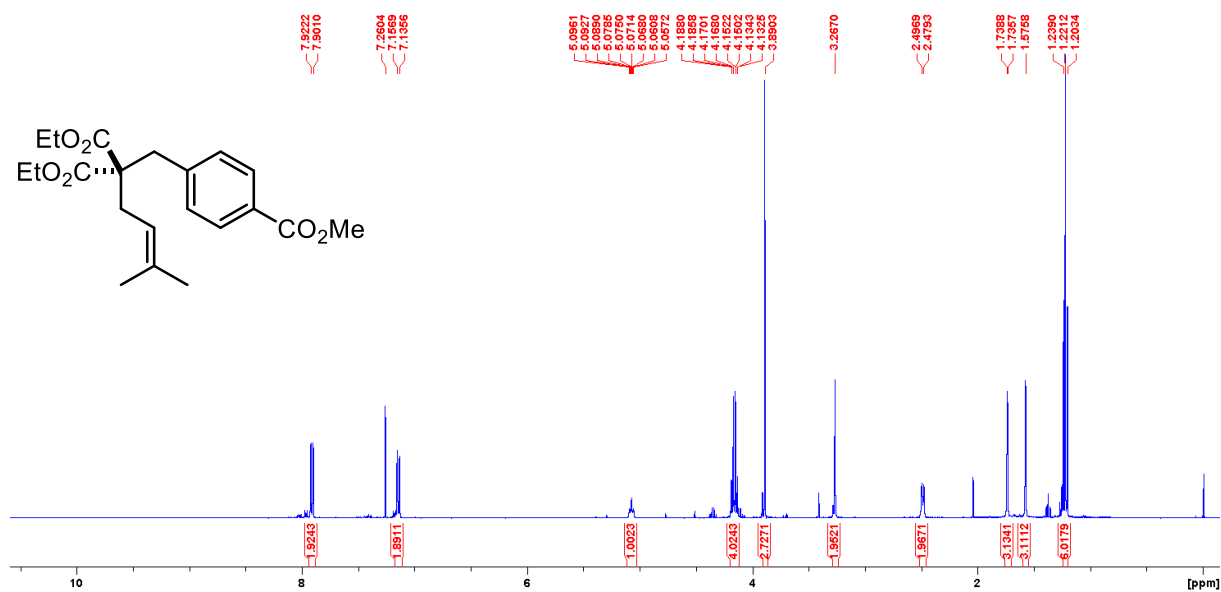

$^{13}\text{C}\{^1\text{H}\}$  NMR (100 MHz,  $\text{CDCl}_3$ )

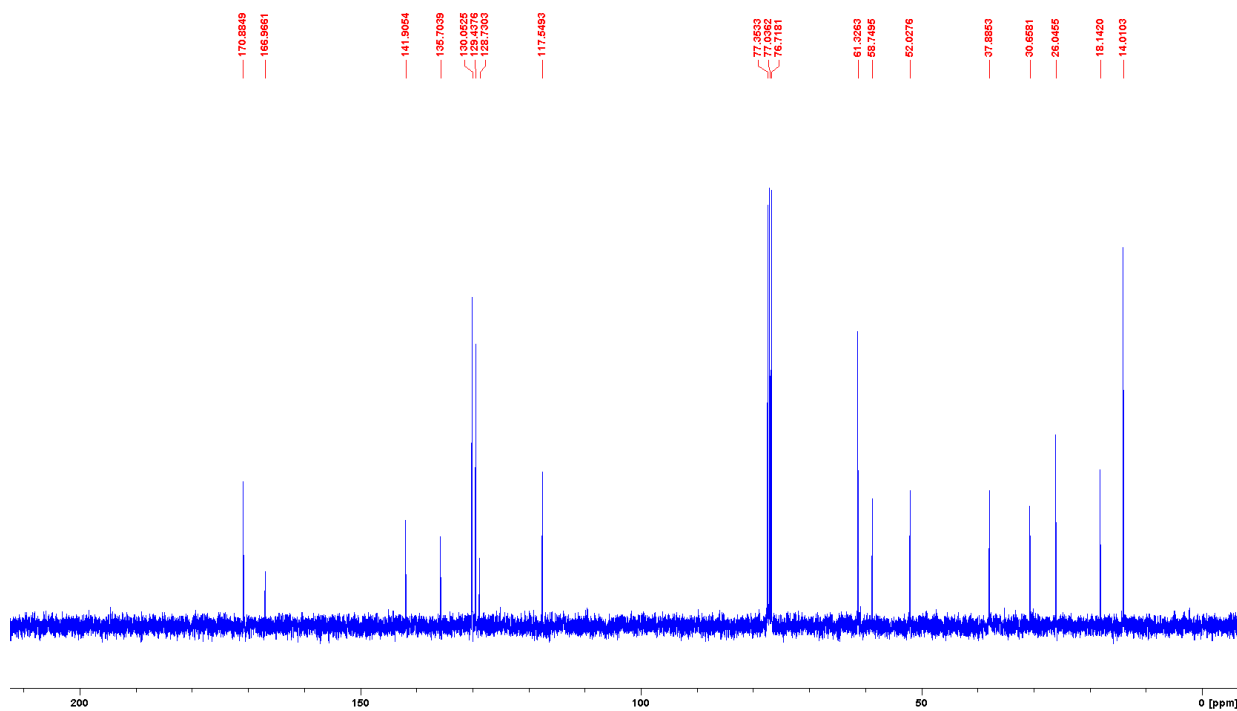

# Diethyl (3-cyanobenzyl)(3-methylbut-2-enyl)malonate (11I)

$^1\text{H}$  NMR (400 MHz,  $\text{CDCl}_3$ )

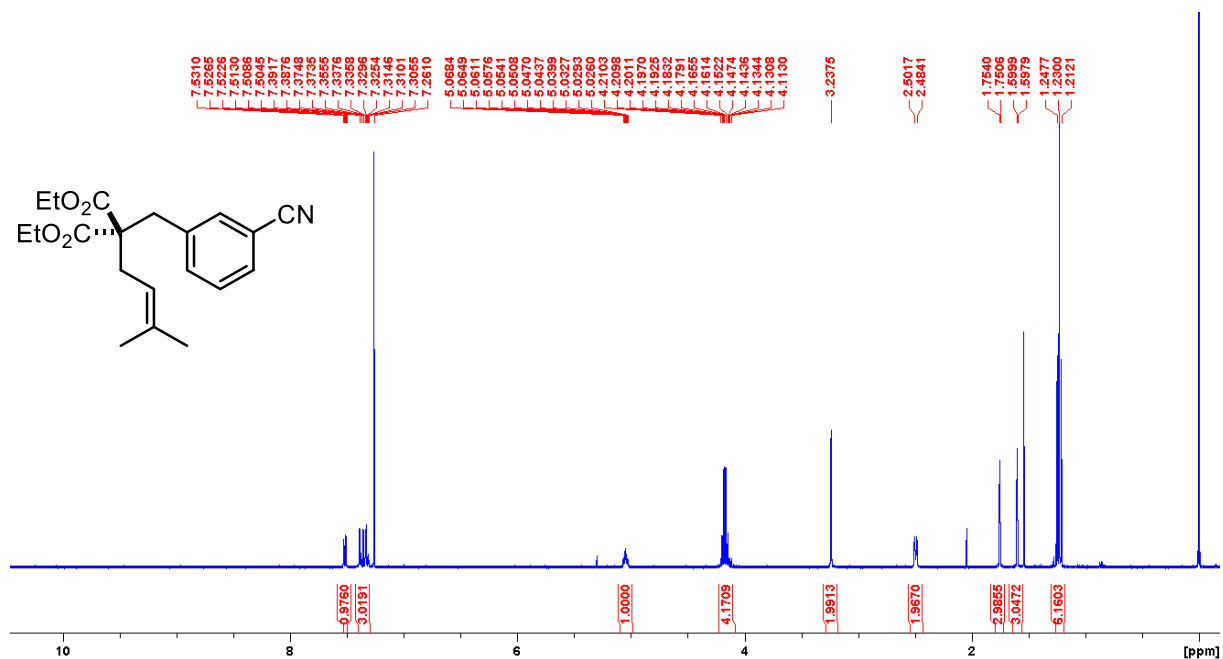

$^{13}\text{C}\{^1\text{H}\}$  NMR (100 MHz,  $\text{CDCl}_3$ )

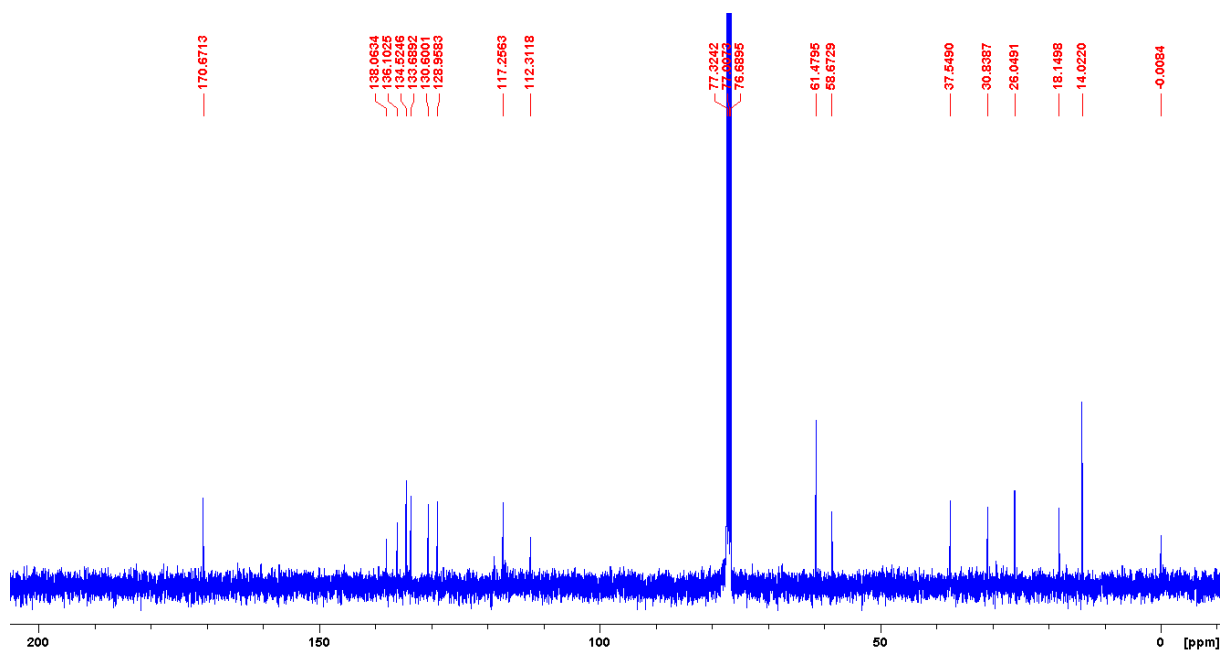

# Diethyl (4-cyanobenzyl)(3-methylbut-2-enyl)malonate (11m)

$^1\text{H}$  NMR (400 MHz,  $\text{CDCl}_3$ )

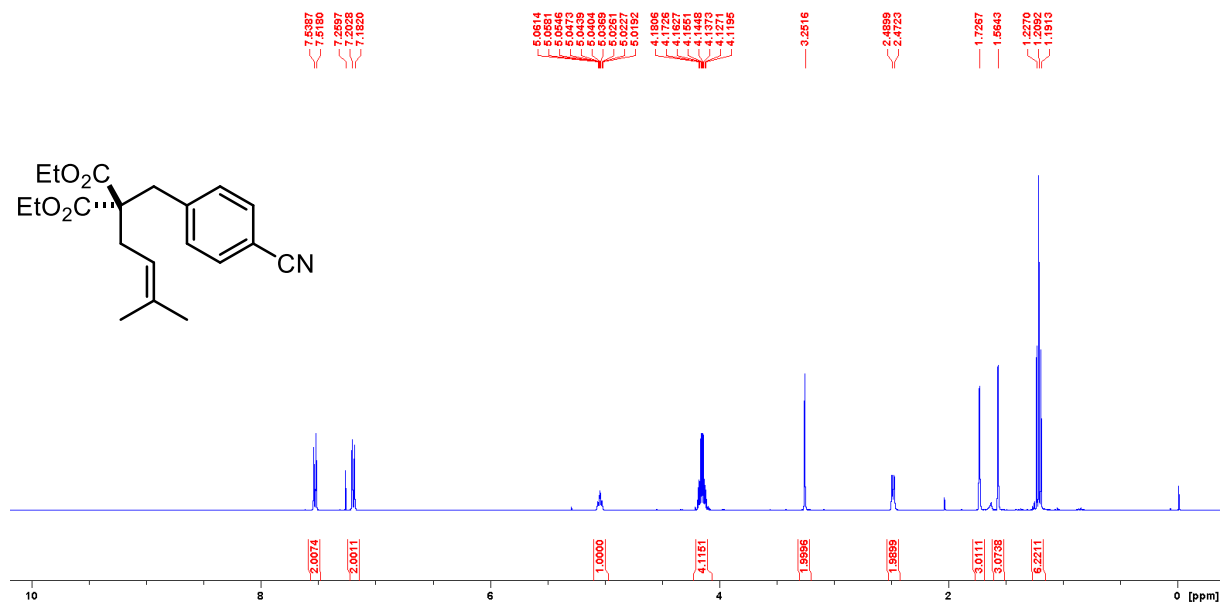

$^{13}\text{C}\{^1\text{H}\}$  NMR (100 MHz,  $\text{CDCl}_3$ )

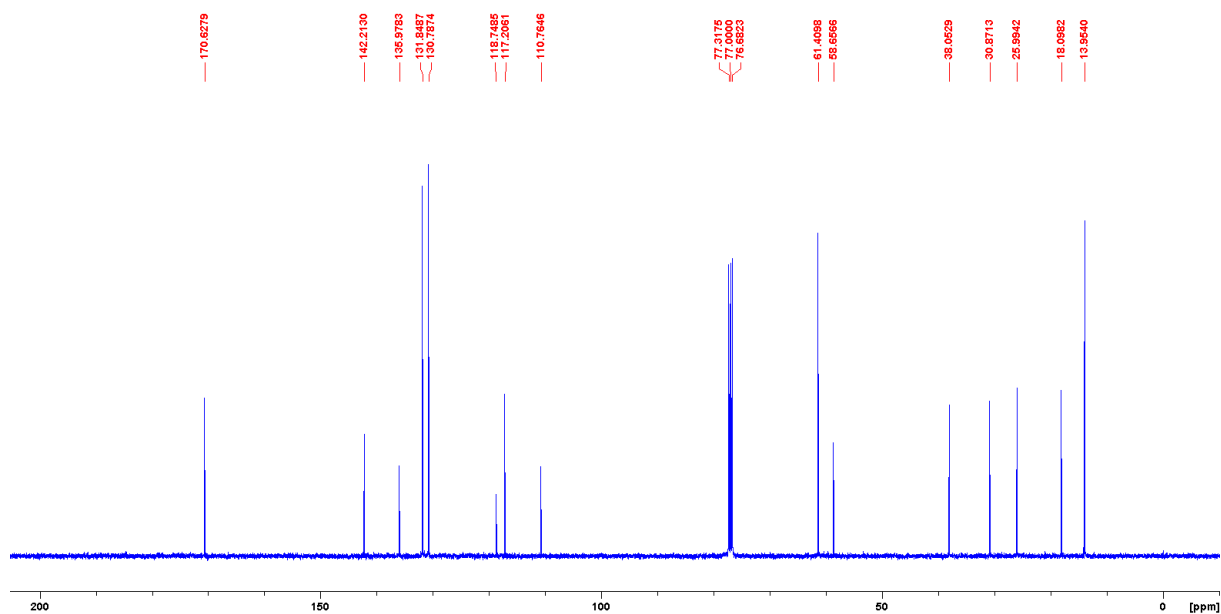

# Diethyl (4-nitrobenzyl)(3-methylbut-2-enyl)malonate (11n)

$^1\text{H}$  NMR (400 MHz,  $\text{CDCl}_3$ )

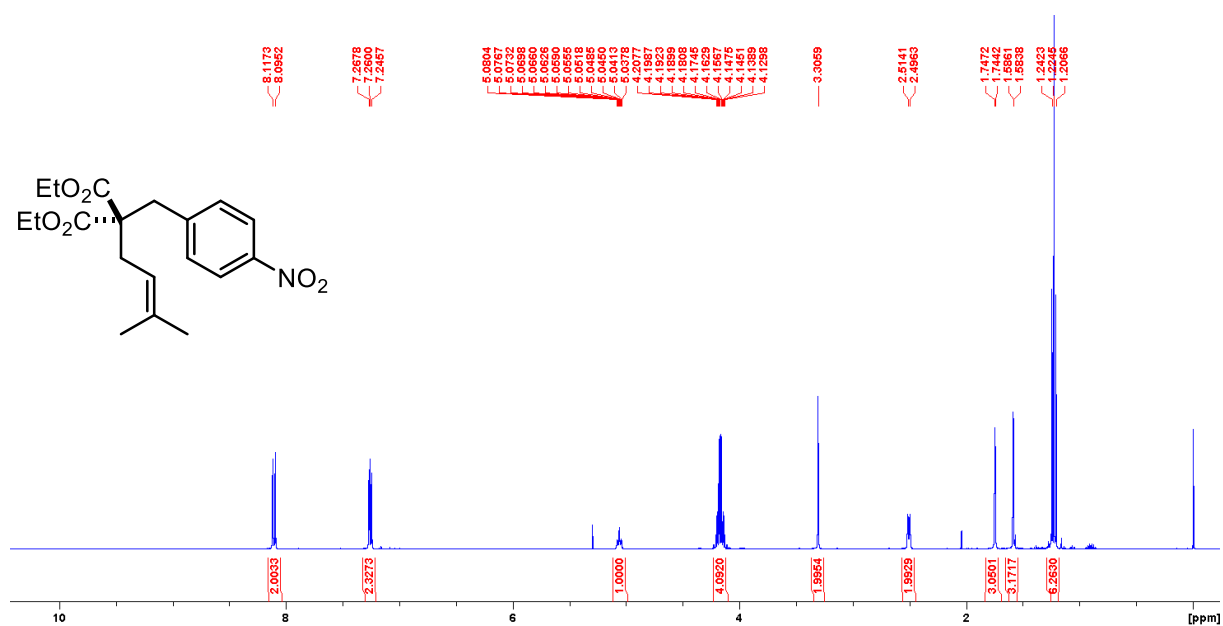

$^{13}\text{C}\{^1\text{H}\}$  NMR (100 MHz,  $\text{CDCl}_3$ )

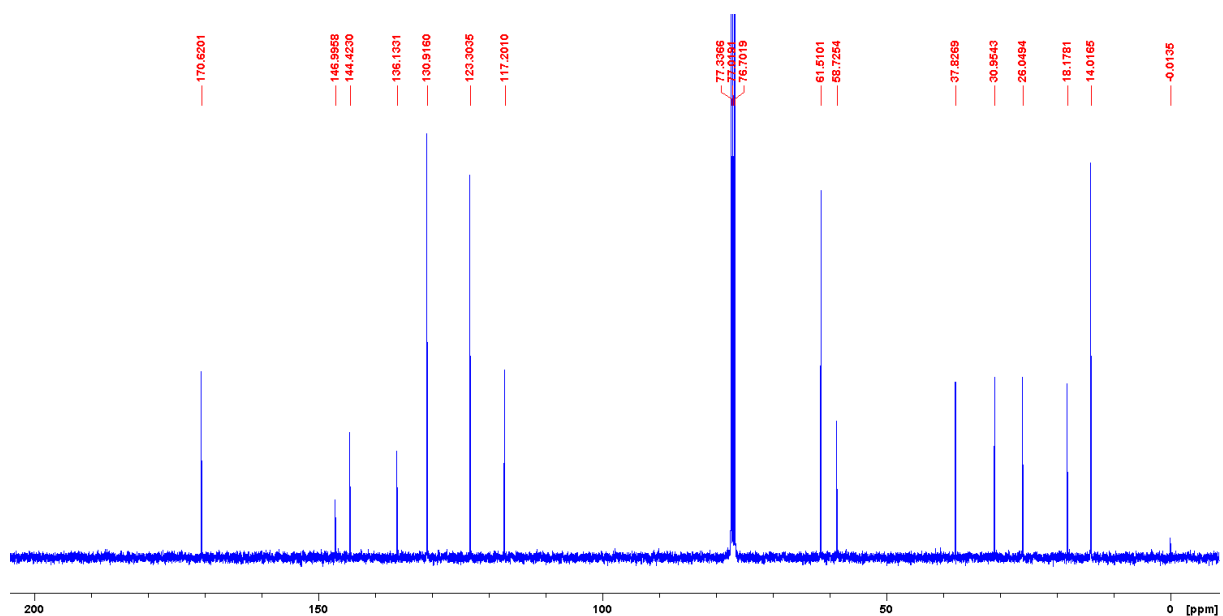

# 3,3-Bis(ethoxycarbonyl)-5-methyl-1-(2,4,6-trimethoxyphenyl)-1,2,3,4-tetrahydronaphthalene (12a)

$^1\text{H}$  NMR (400 MHz,  $\text{CDCl}_3$ )

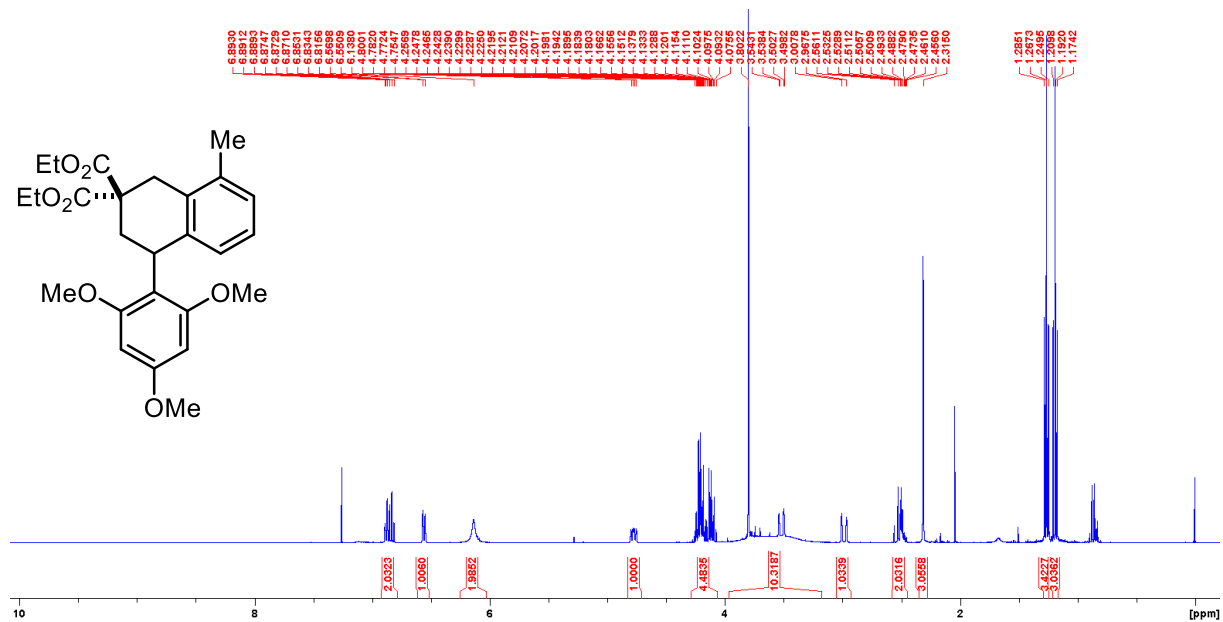

$^{13}\text{C}\{^1\text{H}\}$  NMR (100 MHz,  $\text{CDCl}_3$ )

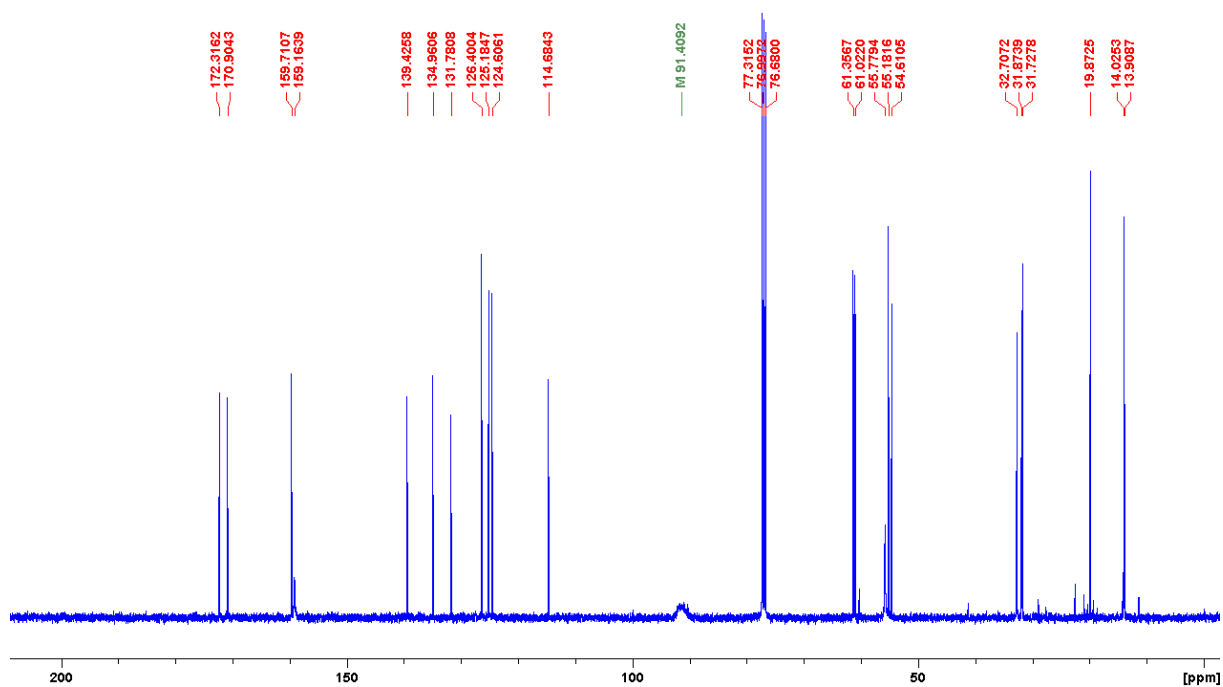



# 3,3-Bis(ethoxycarbonyl)-5-fluoro-1-(2,4,6-trimethoxyphenyl)-1,2,3,4-tetrahydronaphthalene (12b)

$^1\text{H}$  NMR (400 MHz,  $\text{CDCl}_3$ )

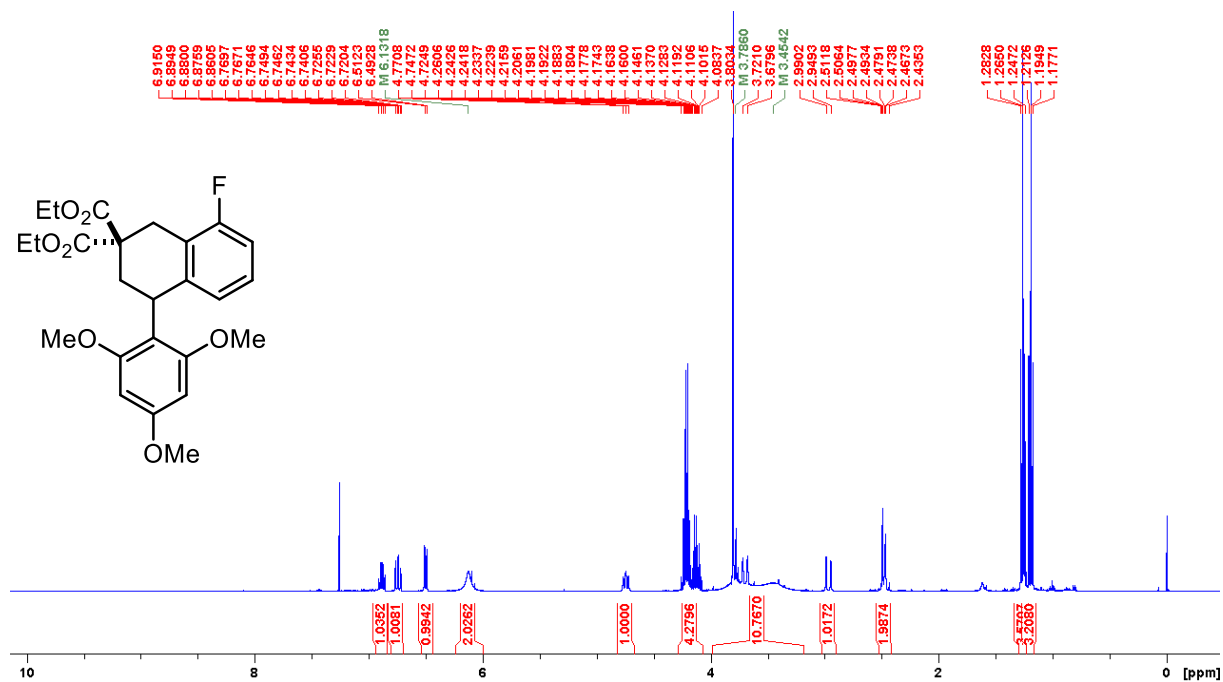

$^{13}\text{C}\{^1\text{H}\}$  NMR (100 MHz,  $\text{CDCl}_3$ )

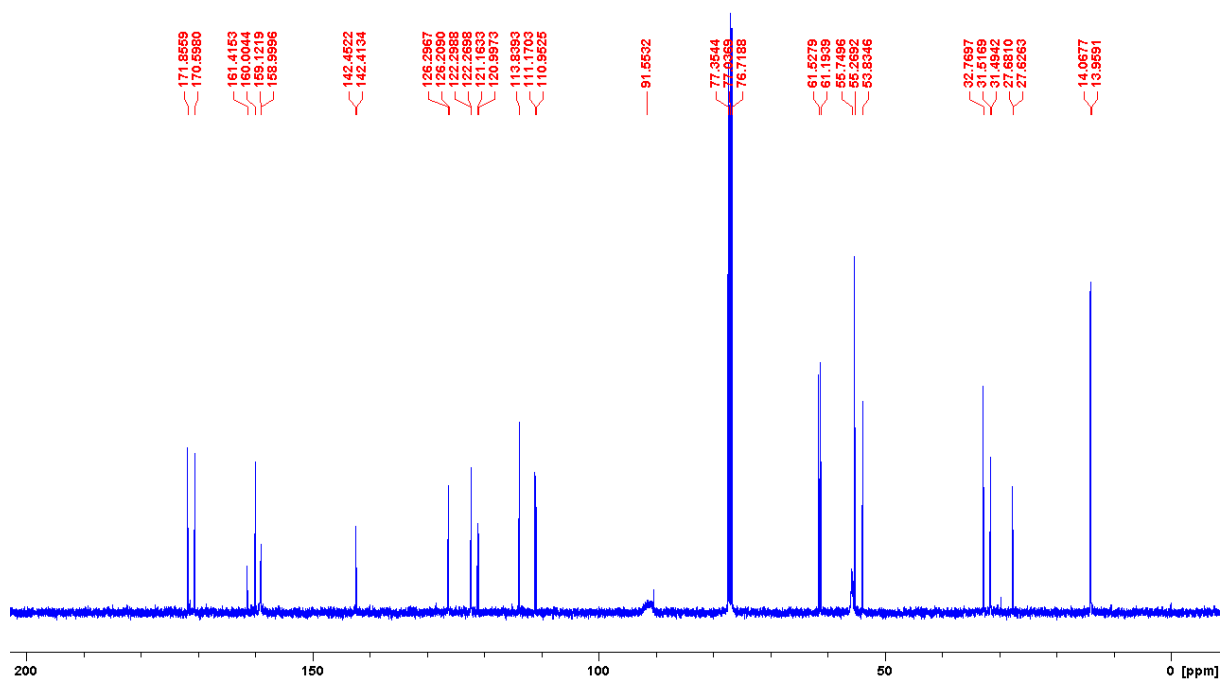

# 3,3-Bis(ethoxycarbonyl)-5-chloro-1-(2,4,6-trimethoxyphenyl)-1,2,3,4-tetrahydronaphthalene (12c)

$^1\text{H}$  NMR (400 MHz,  $\text{CDCl}_3$ )

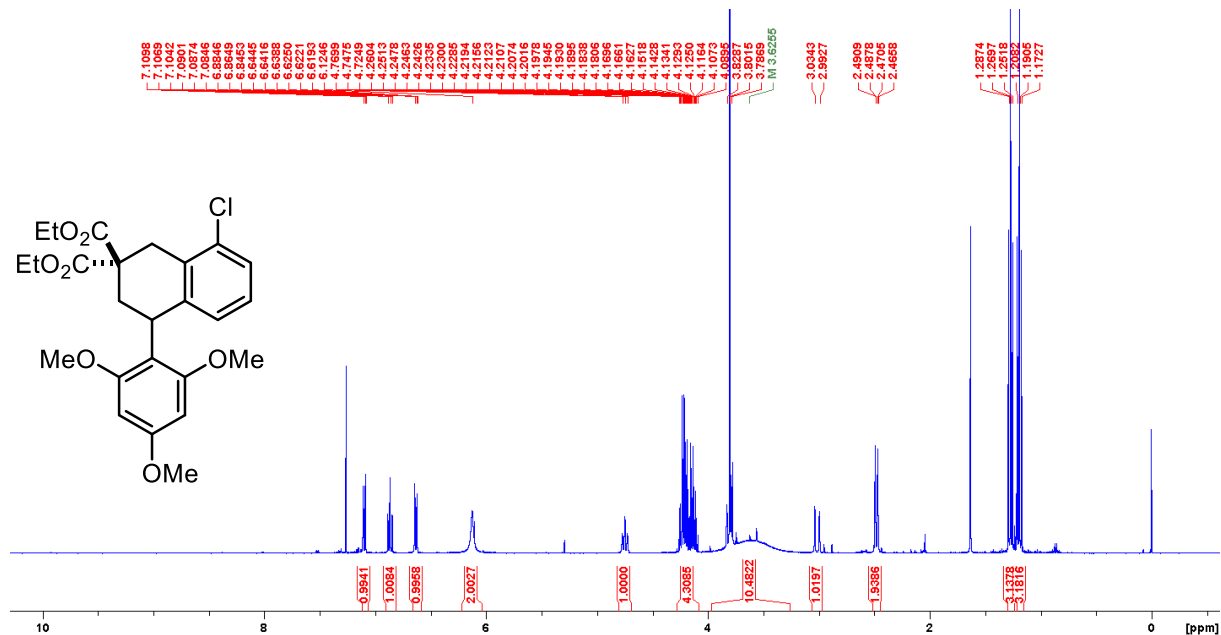

$^{13}\text{C}\{^1\text{H}\}$  NMR (100 MHz,  $\text{CDCl}_3$ )

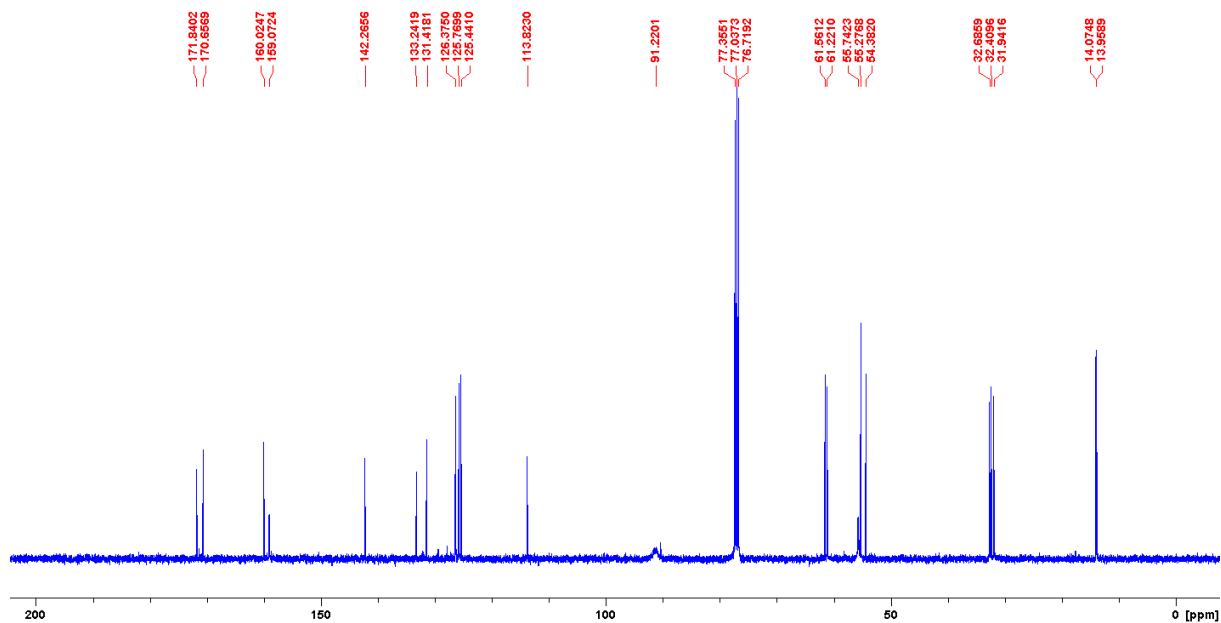

# 3,3-Bis(ethoxycarbonyl)-5-methoxy-1-(2,4,6-trimethoxyphenyl)-1,2,3,4-tetrahydronaphthalene (12d)

$^1\text{H}$  NMR (400 MHz,  $\text{CDCl}_3$ )

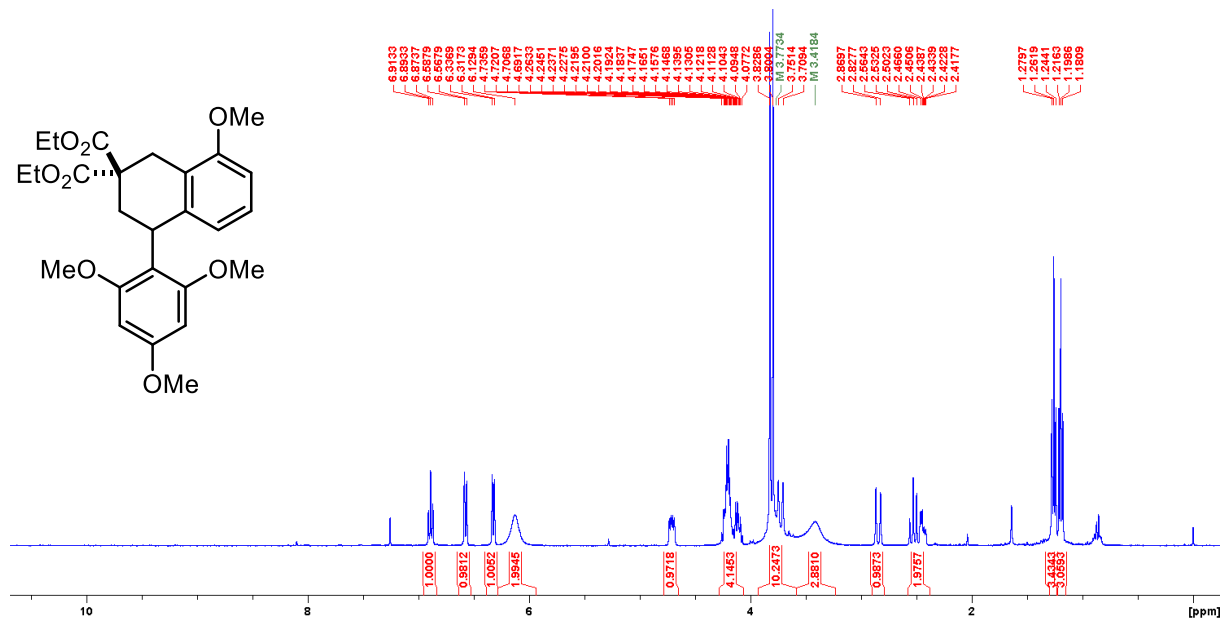

$^{13}\text{C}\{^1\text{H}\}$  NMR (100 MHz,  $\text{CDCl}_3$ )

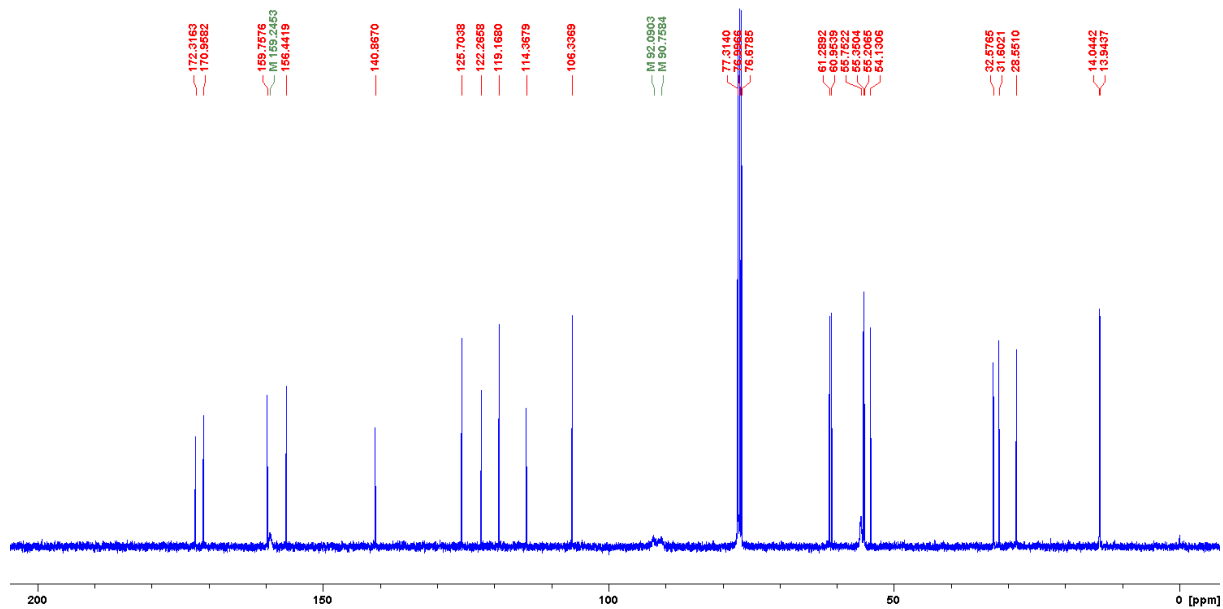

# 3,3-Bis(ethoxycarbonyl)-6-methyl-1-(2,4,6-trimethoxyphenyl)-1,2,3,4-tetrahydronaphthalene (12e)

$^1\text{H}$  NMR (400 MHz,  $\text{CDCl}_3$ )

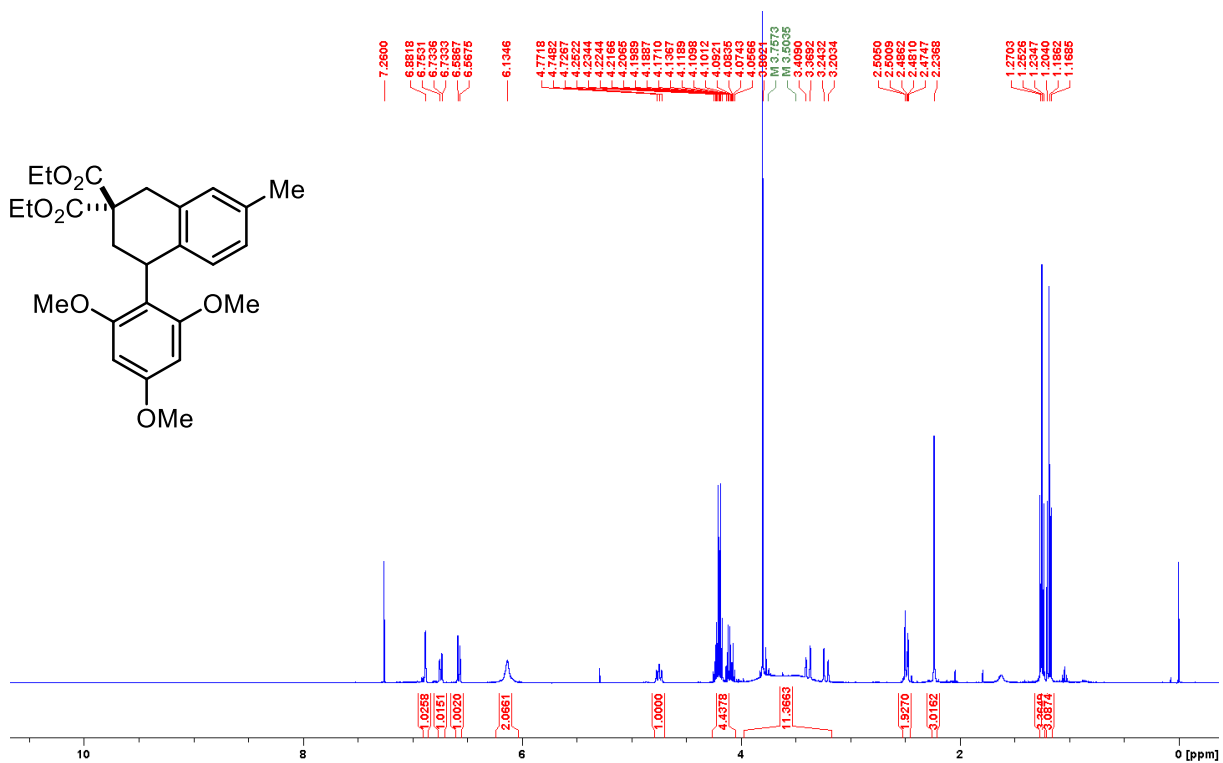

$^{13}\text{C}\{^1\text{H}\}$  NMR (100 MHz,  $\text{CDCl}_3$ )

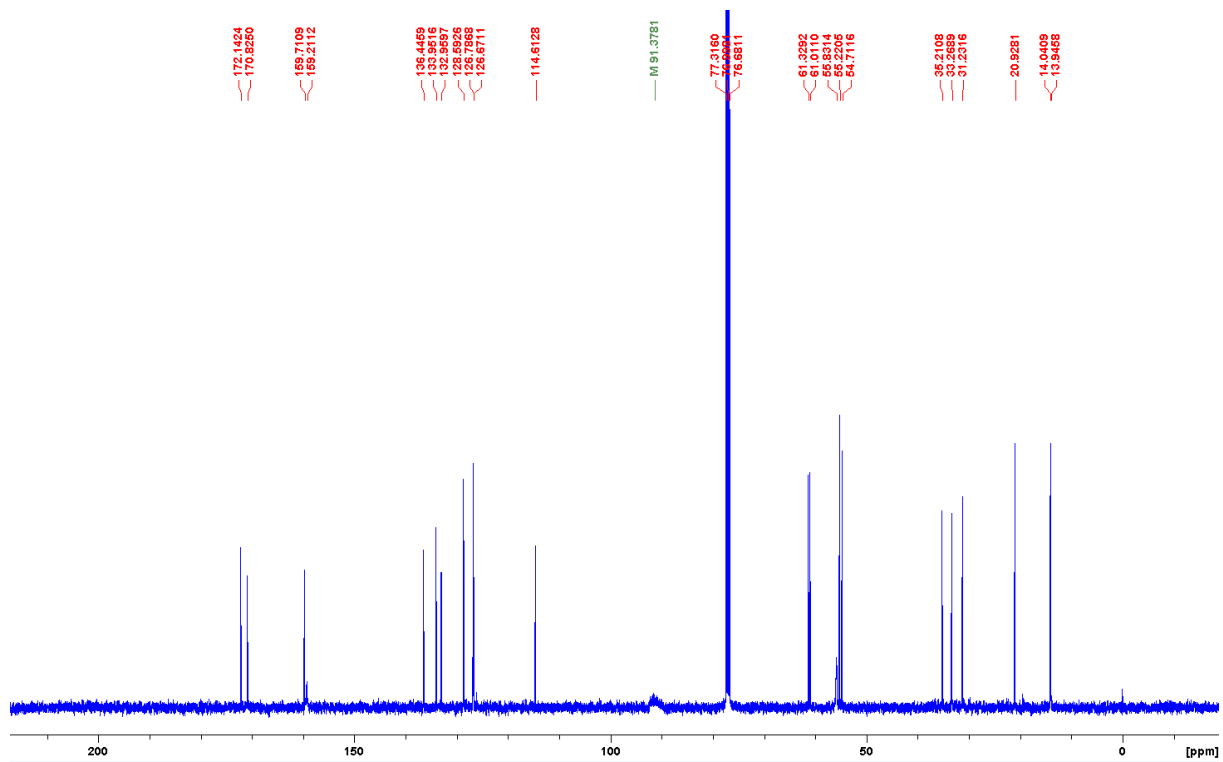

# 3,3-Bis(ethoxycarbonyl)-6-fluoro-1-(2,4,6-trimethoxyphenyl)-1,2,3,4-tetrahydronaphthalene (12f)

$^1\text{H}$  NMR (400 MHz,  $\text{CDCl}_3$ )

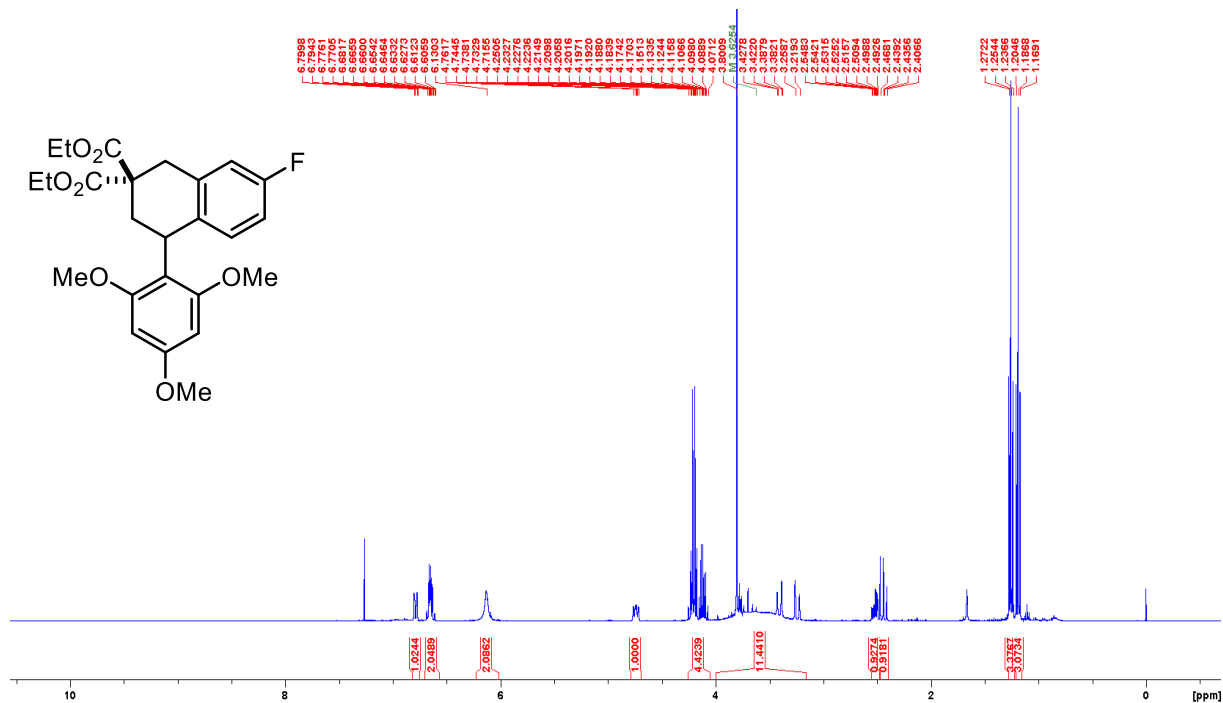

$^{13}\text{C}\{^1\text{H}\}$  NMR (100 MHz,  $\text{CDCl}_3$ )

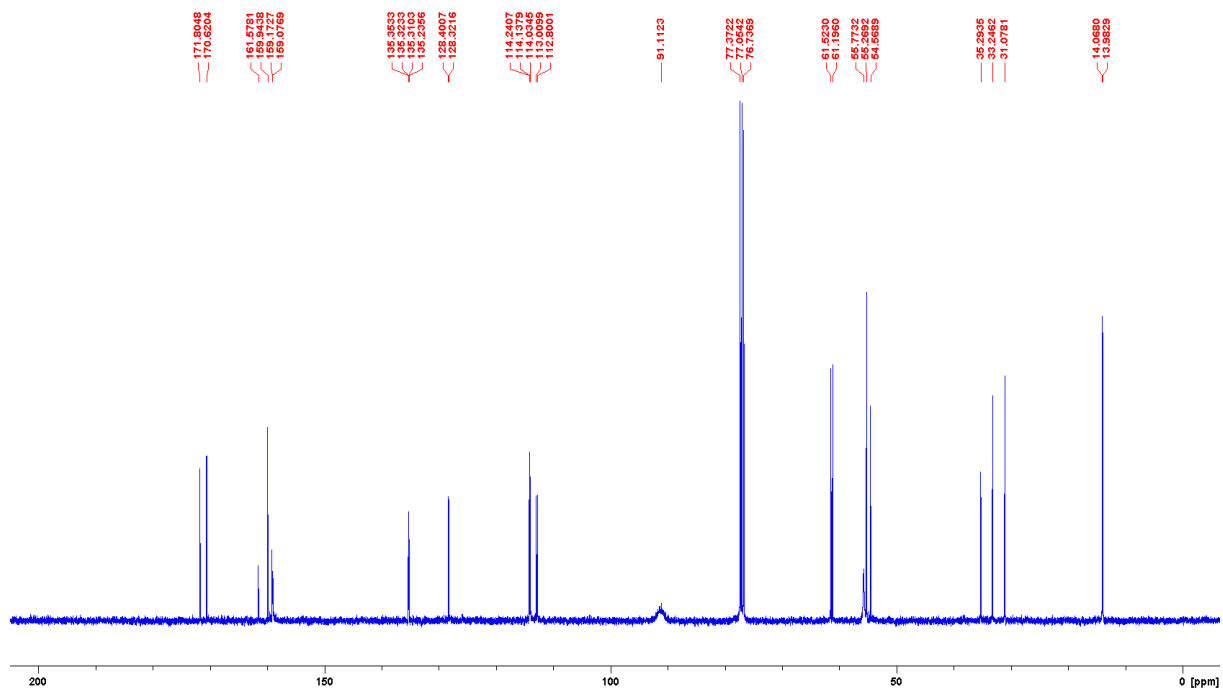

# 3,3-Bis(ethoxycarbonyl)-6-chloro-1-(2,4,6-trimethoxyphenyl)-1,2,3,4-tetrahydronaphthalene (12g)

$^1\text{H}$  NMR (400 MHz,  $\text{CDCl}_3$ )

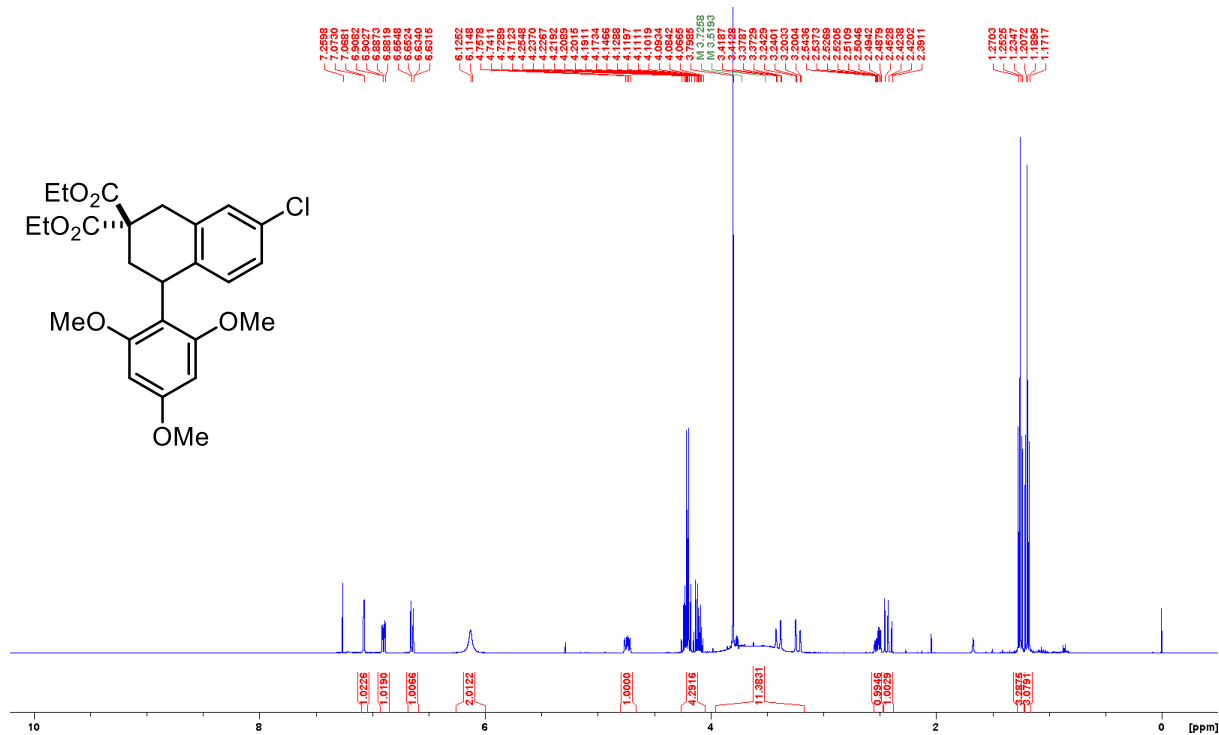

$^{13}\text{C}\{^1\text{H}\}$  NMR (100 MHz,  $\text{CDCl}_3$ )

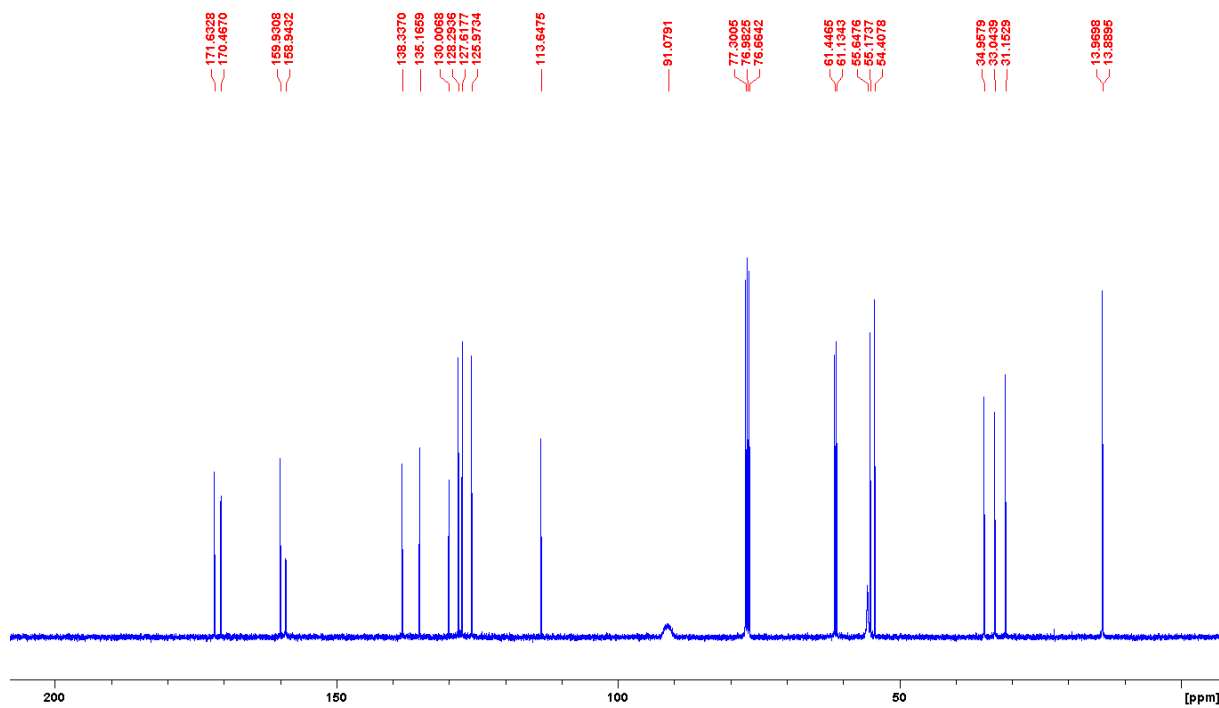

# 3,3-Bis(ethoxycarbonyl)-6-bromo-1-(2,4,6-trimethoxyphenyl)-1,2,3,4-tetrahydronaphthalene (12h)

<sup>1</sup>H NMR (400 MHz, CDCl<sub>3</sub>)

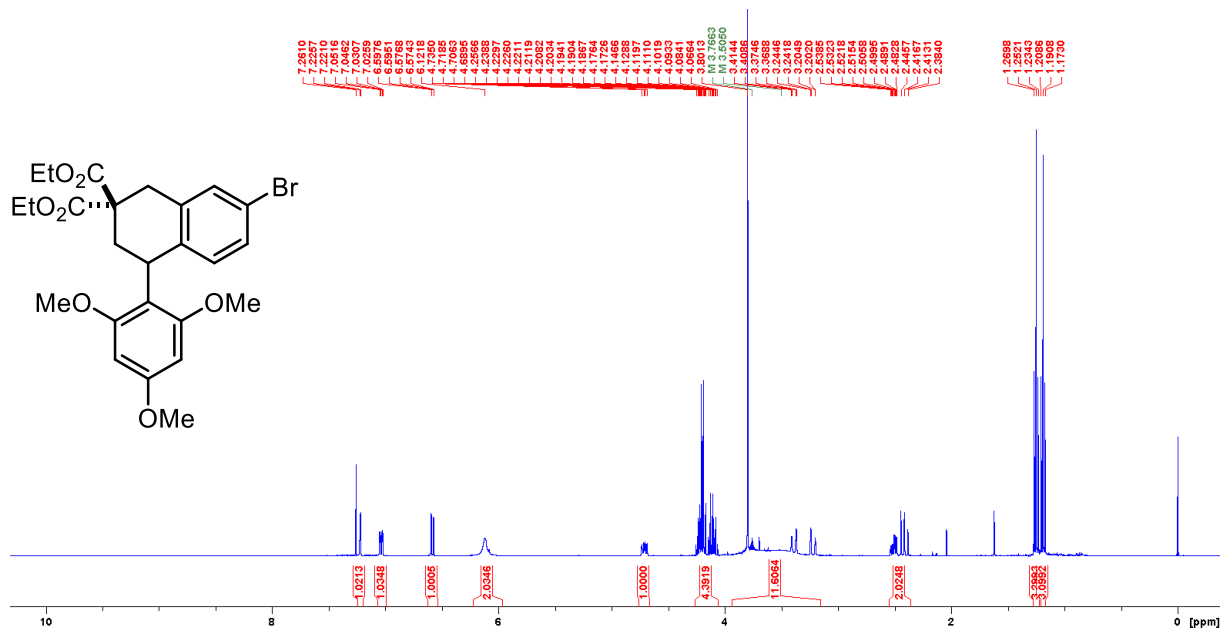

<sup>13</sup>C{<sup>1</sup>H} NMR (100 MHz, CDCl<sub>3</sub>)

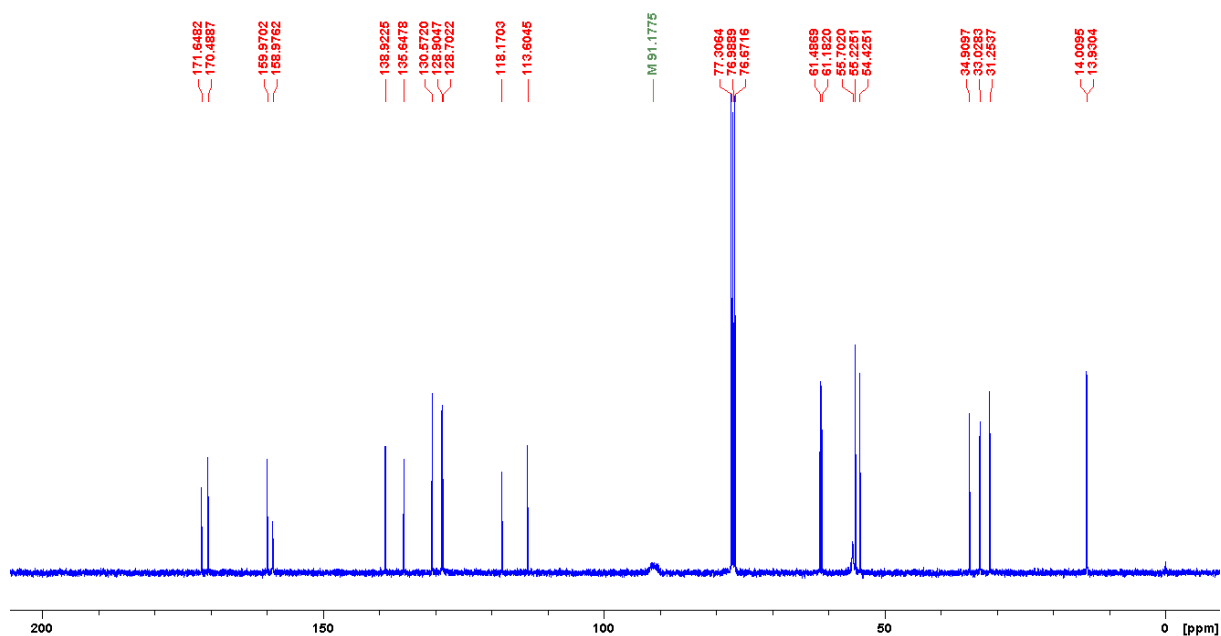

# 3,3-Bis(ethoxycarbonyl)-6-methoxy-1-(2,4,6-trimethoxyphenyl)-1,2,3,4-tetrahydronaphthalene (12i)

$^1\text{H}$  NMR (400 MHz,  $\text{CDCl}_3$ )

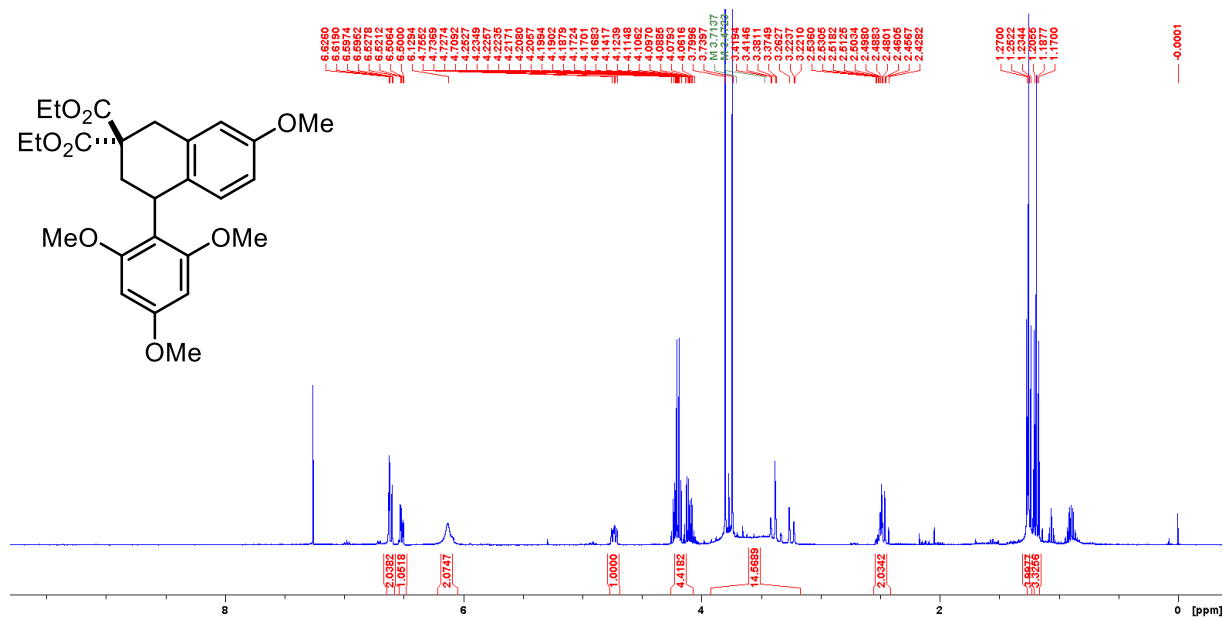

$^{13}\text{C}\{^1\text{H}\}$  NMR (100 MHz,  $\text{CDCl}_3$ )

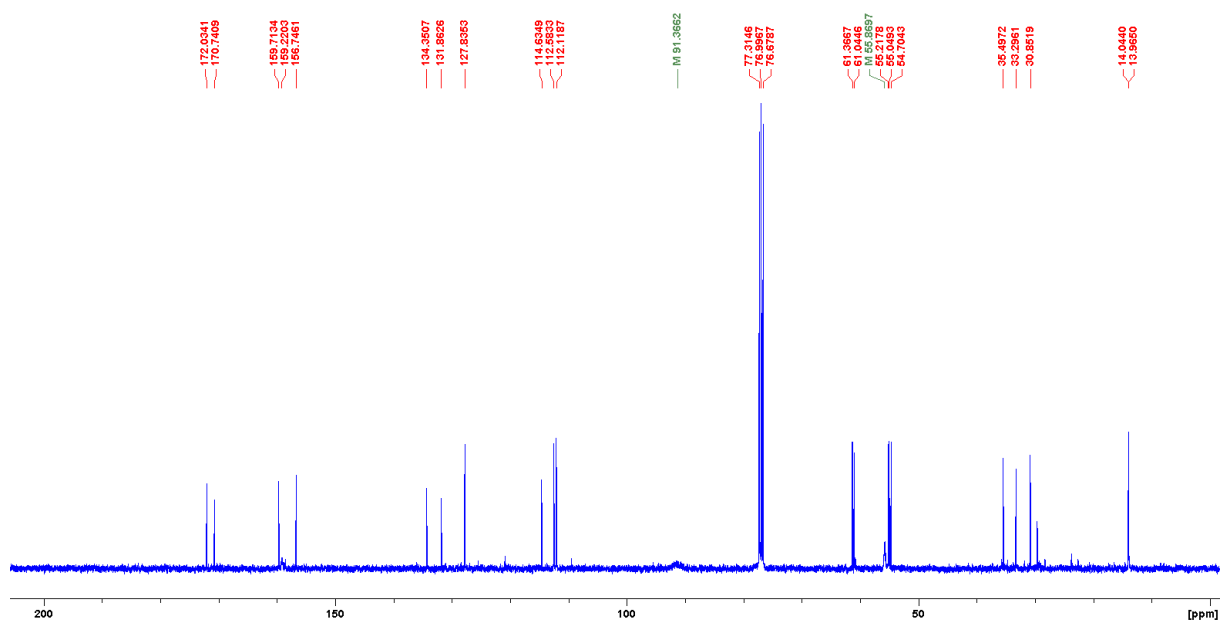



# 3,3-Bis(ethoxycarbonyl)-7-bromo-1-(2,4,6-trimethoxyphenyl)-1,2,3,4-tetrahydronaphthalene (12j)

$^1\text{H}$  NMR (400 MHz,  $\text{CDCl}_3$ )

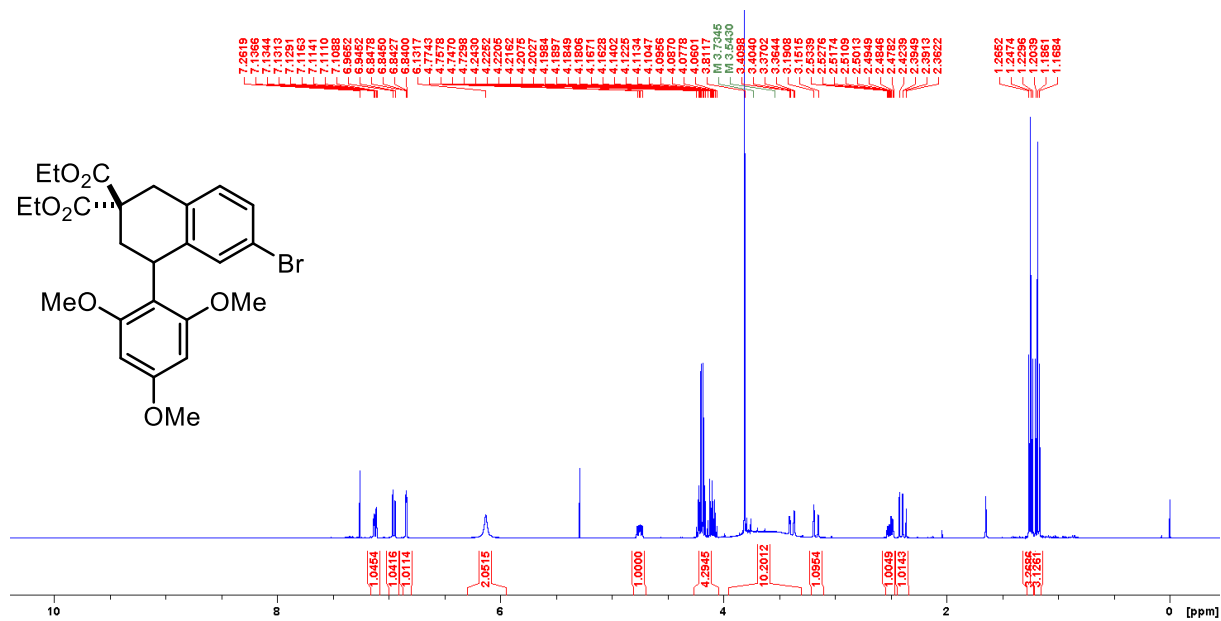

$^{13}\text{C}\{^1\text{H}\}$  NMR (100 MHz,  $\text{CDCl}_3$ )

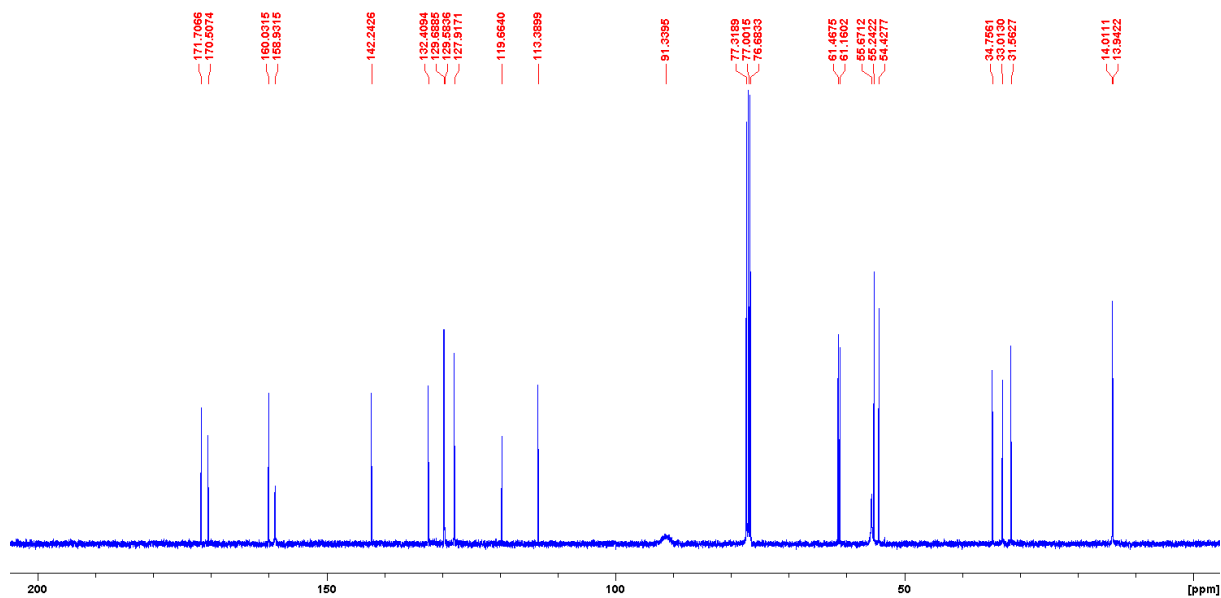

# 3,3-Bis(ethoxycarbonyl)-7-methoxycarbonyl-1-(2,4,6-trimethoxyphenyl)-1,2,3,4-tetrahydronaphthalene (12k)

$^1\text{H}$  NMR (400 MHz,  $\text{CDCl}_3$ )

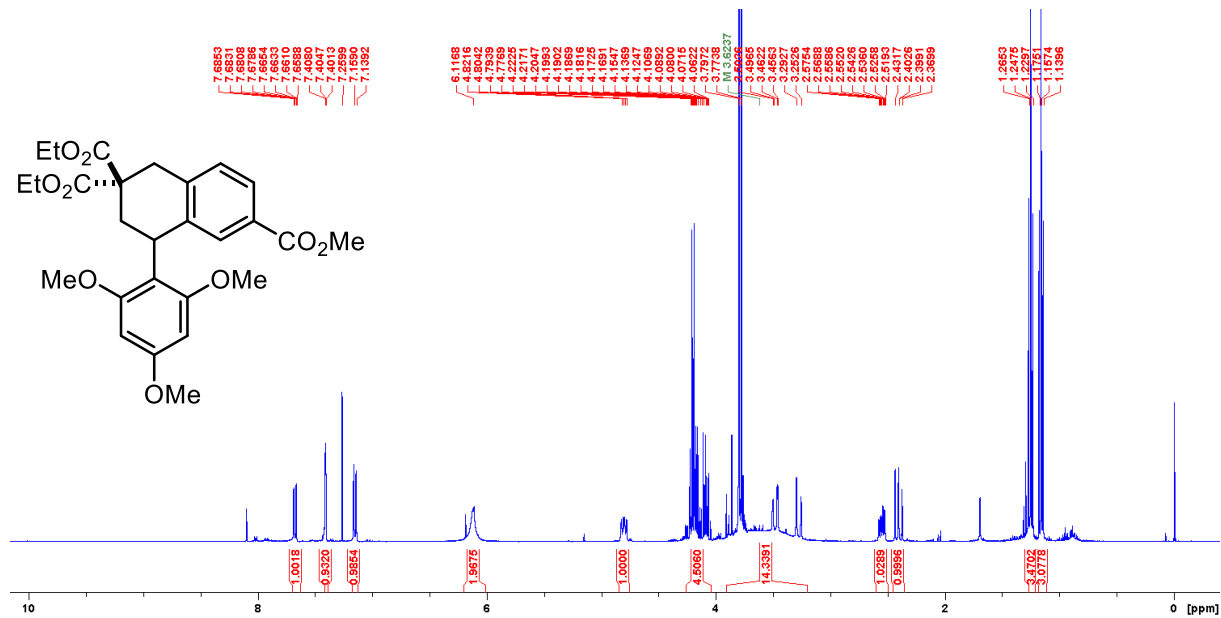

$^{13}\text{C}\{^1\text{H}\}$  NMR (100 MHz,  $\text{CDCl}_3$ )

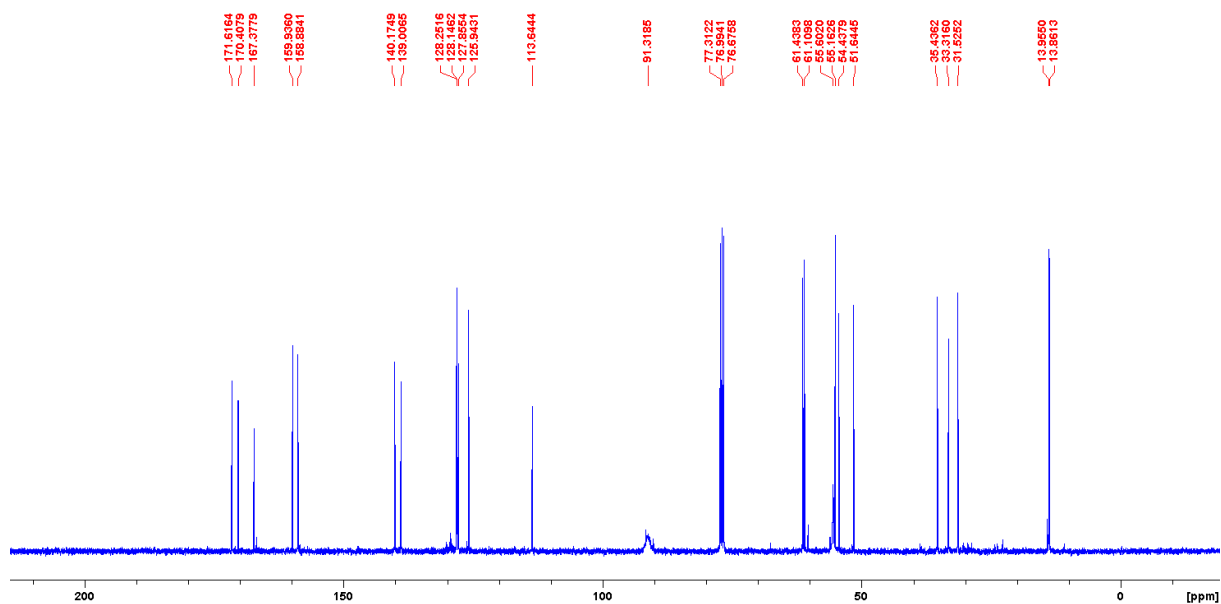

# 2-[3,3-Bis(ethoxycarbonyl)-4-(4-cyanophenyl)-1-buten-1-yl]-1,3,5-trimethoxybenzene (13m)

<sup>1</sup>H NMR (400 MHz, CDCl<sub>3</sub>)

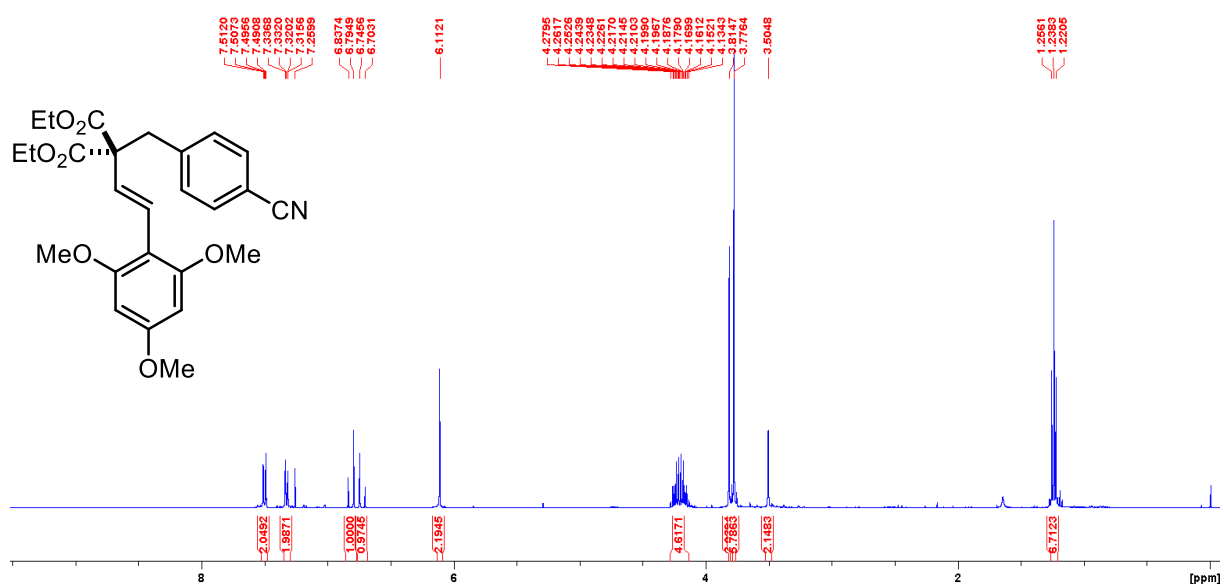

<sup>13</sup>C{<sup>1</sup>H} NMR (100 MHz, CDCl<sub>3</sub>)

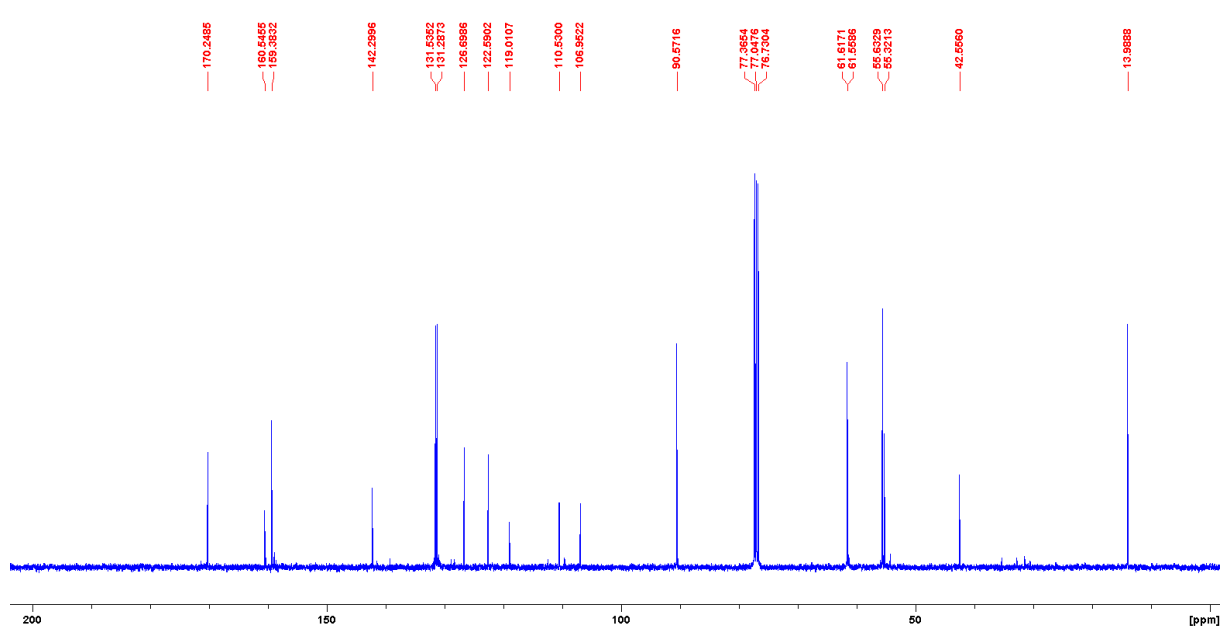

# 2-[3,3-Bis(ethoxycarbonyl)-4-(4-nitrophenyl)-1-buten-1-yl]-1,3,5-trimethoxybenzene (13n)

$^1\text{H NMR}$  (400 MHz,  $\text{CDCl}_3$ )

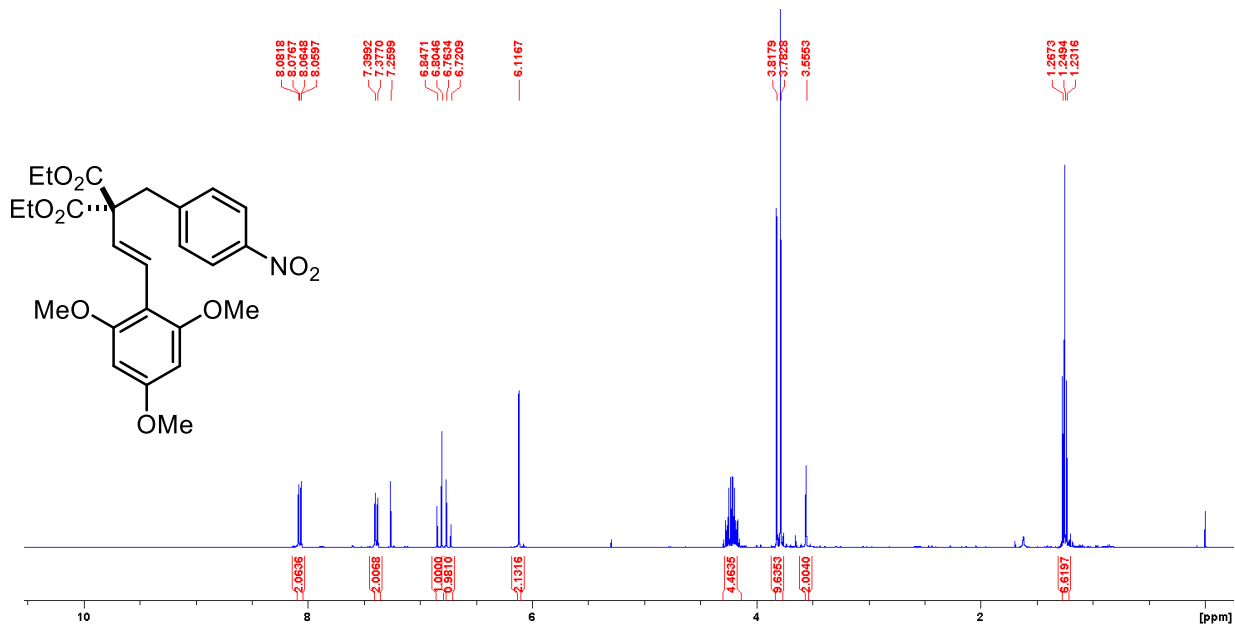

$^{13}\text{C}\{^1\text{H}\}$  NMR (100 MHz,  $\text{CDCl}_3$ )

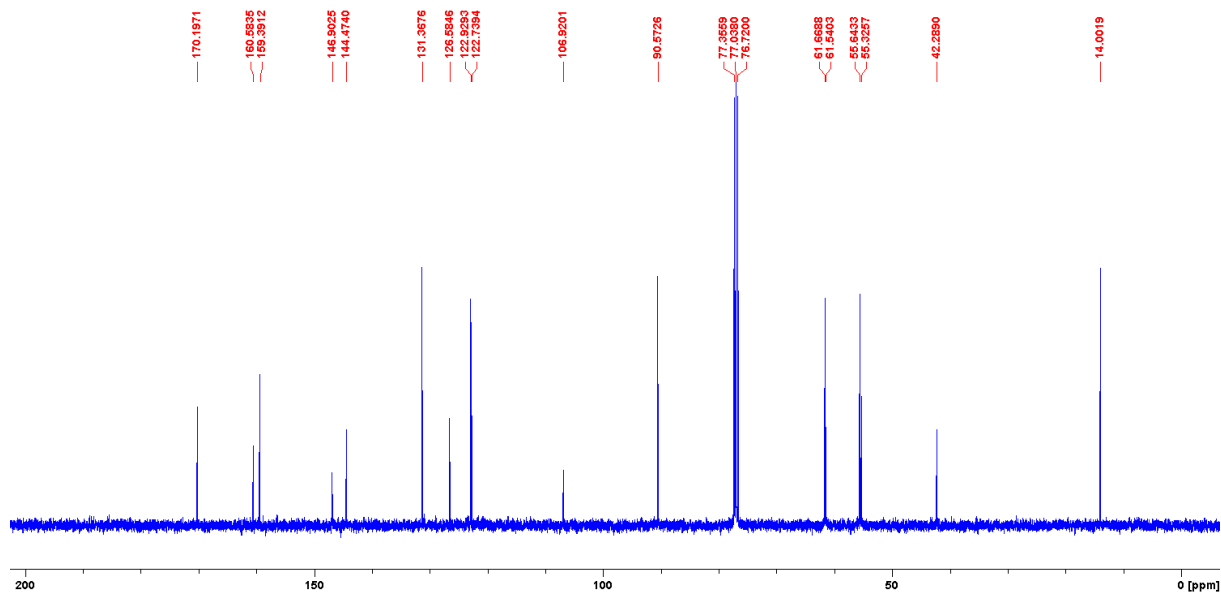

# 3,3-Bis(ethoxycarbonyl)-1-(2,4-dimethoxyphenyl)-1,2,3,4-tetrahydronaphthalene

(14)

$^1\text{H}$  NMR (400 MHz,  $\text{CDCl}_3$ )

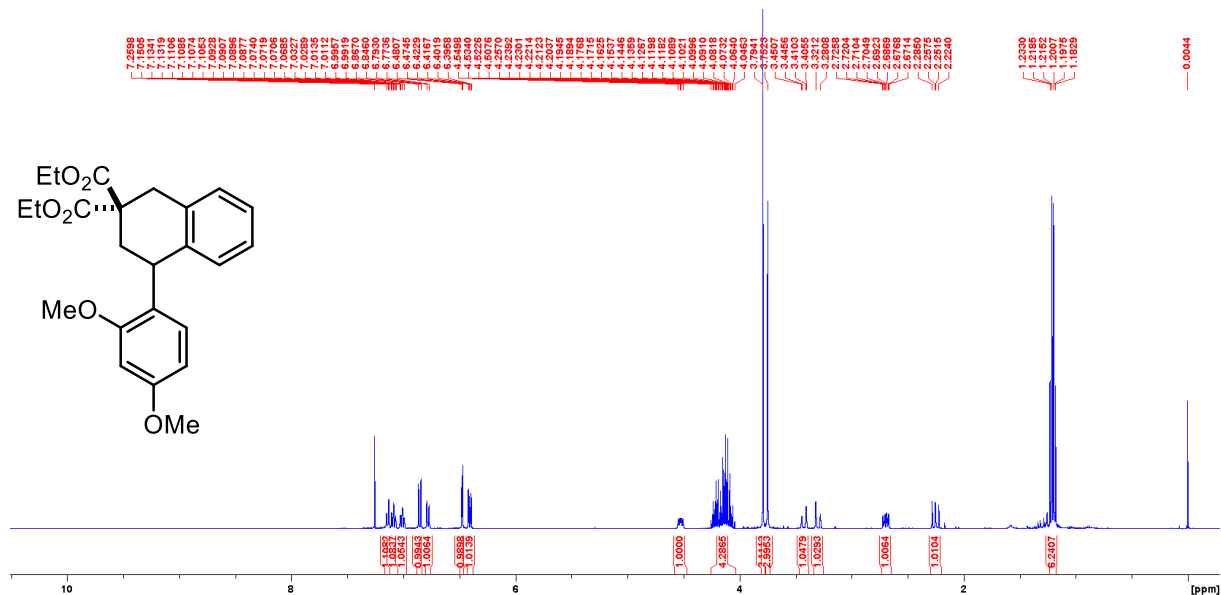

$^{13}\text{C}\{^1\text{H}\}$  NMR (100 MHz,  $\text{CDCl}_3$ )

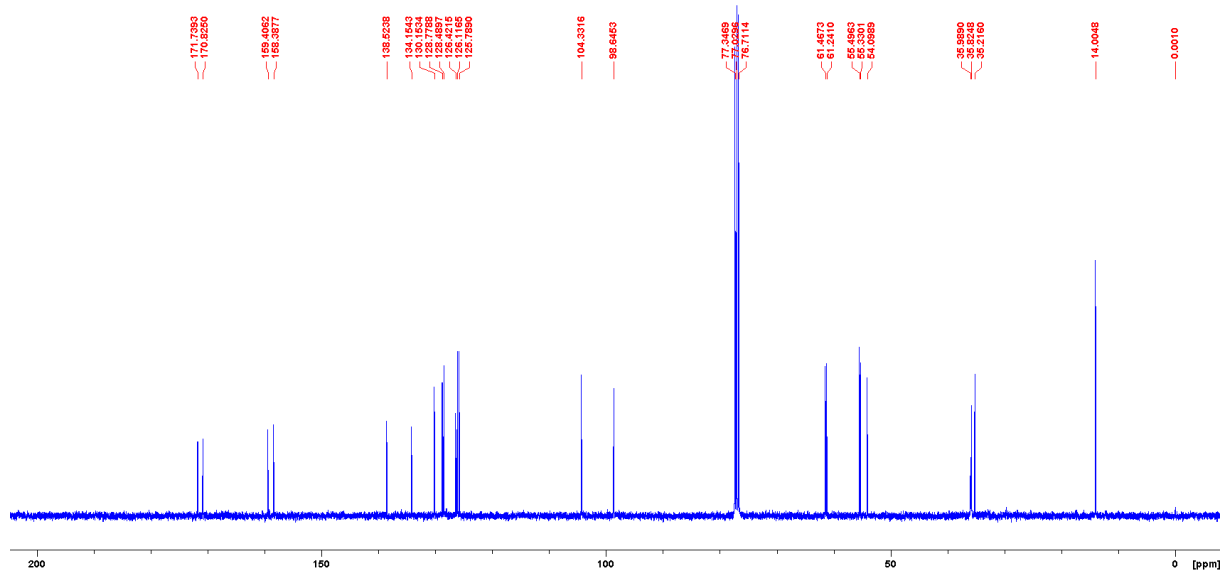

# 3,3-Bis(ethoxycarbonyl)-1-(3,4,5-trimethoxyphenyl)-1,2,3,4-tetrahydronaphthalene (15)

$^1\text{H}$  NMR (400 MHz,  $\text{CDCl}_3$ )

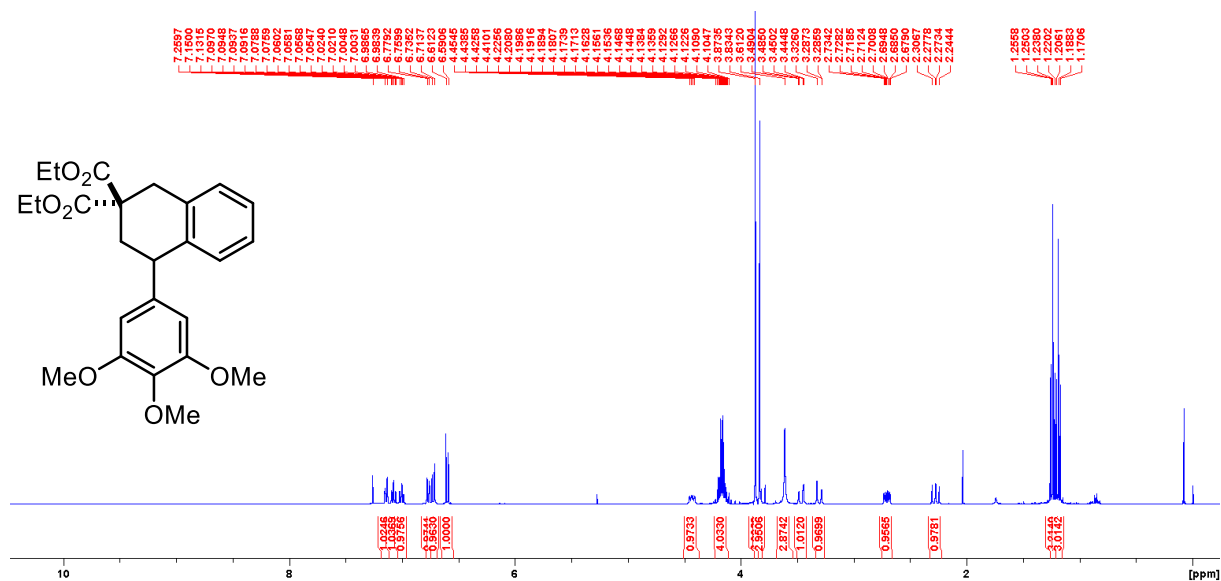

$^{13}\text{C}\{^1\text{H}\}$  NMR (100 MHz,  $\text{CDCl}_3$ )

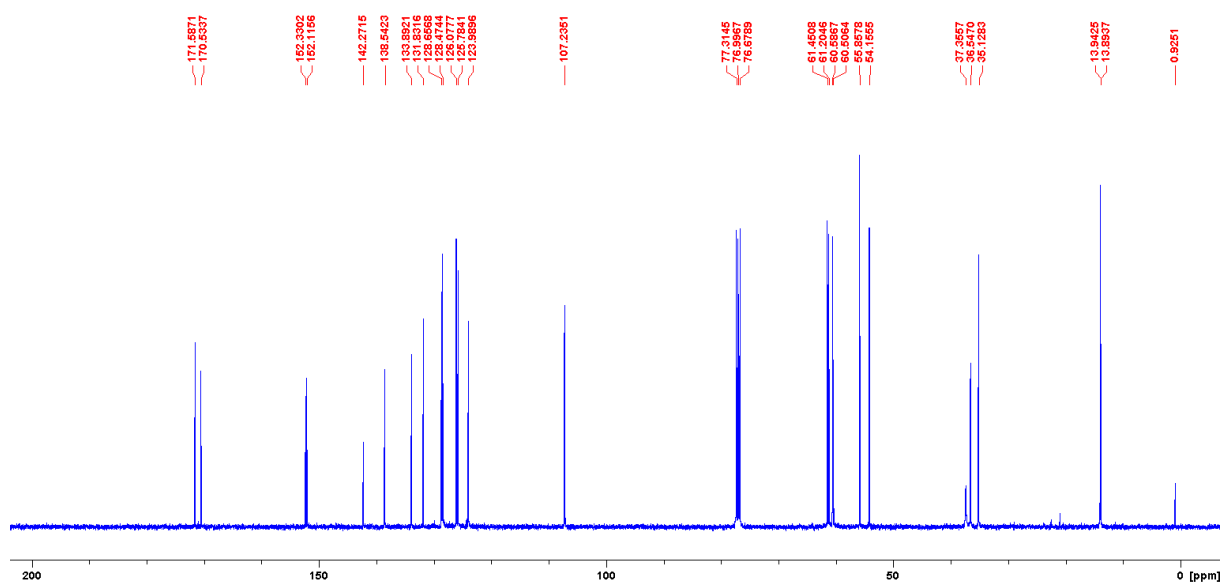

# Diethyl (3-methylbut-2-enyl)(phenyl)malonate (16)

$^1\text{H}$  NMR (400 MHz,  $\text{CDCl}_3$ )

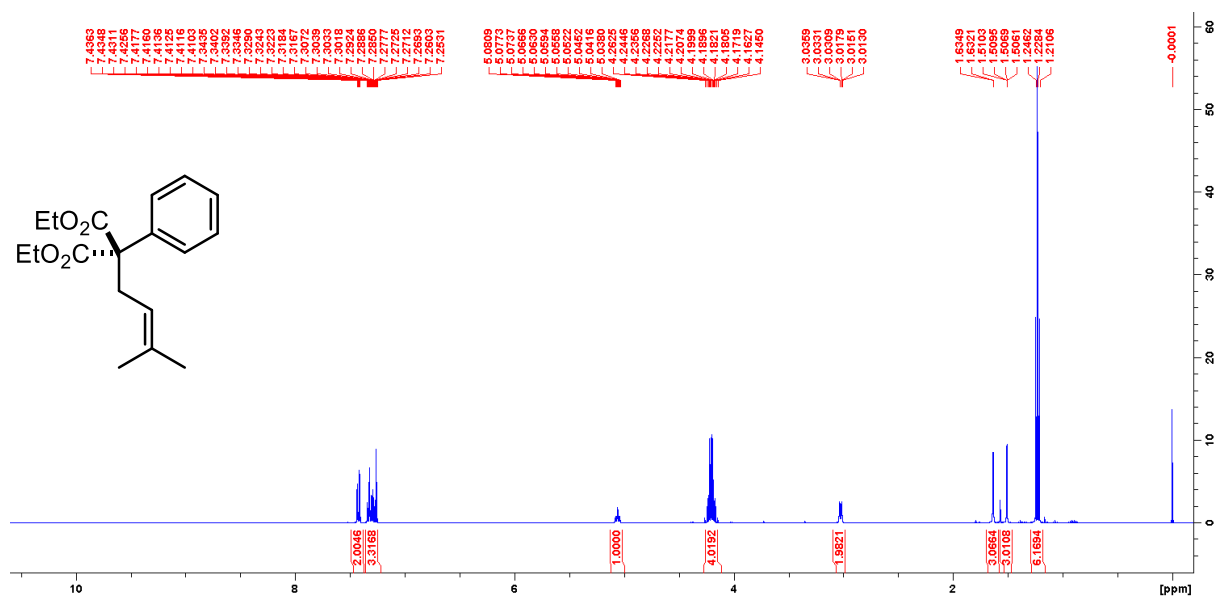

$^{13}\text{C}\{^1\text{H}\}$  NMR (100 MHz,  $\text{CDCl}_3$ )

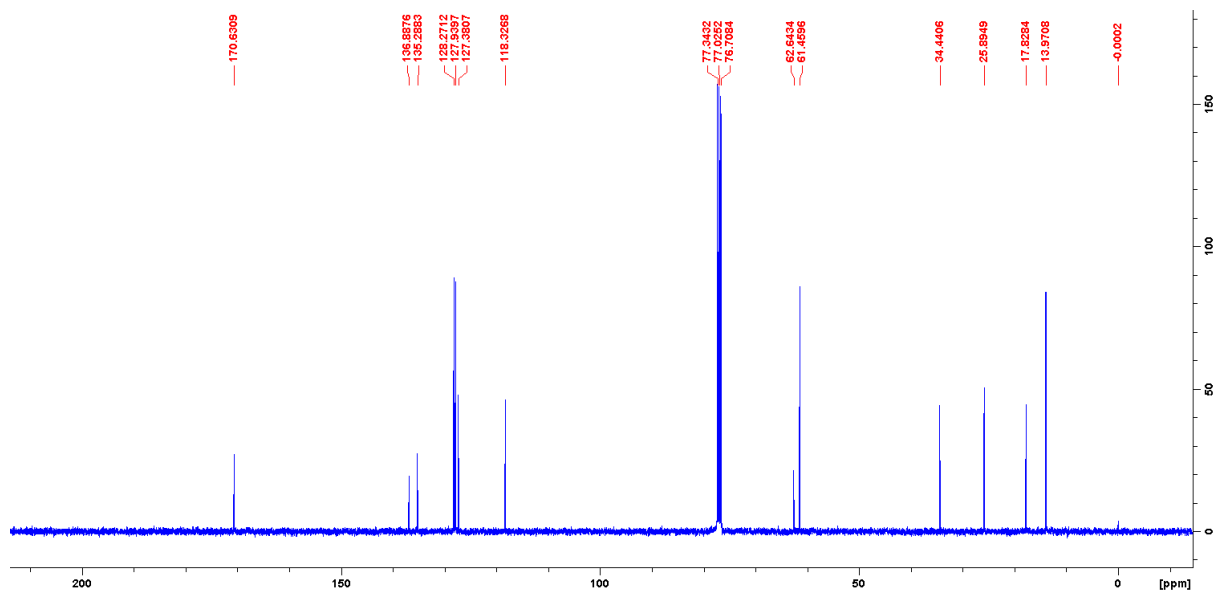

# 3,3-Bis(ethoxycarbonyl)-1-(2,4,6-trimethoxyphenyl)-1,2-dihydroindene (17)

$^1\text{H}$  NMR (400 MHz,  $\text{CDCl}_3$ )

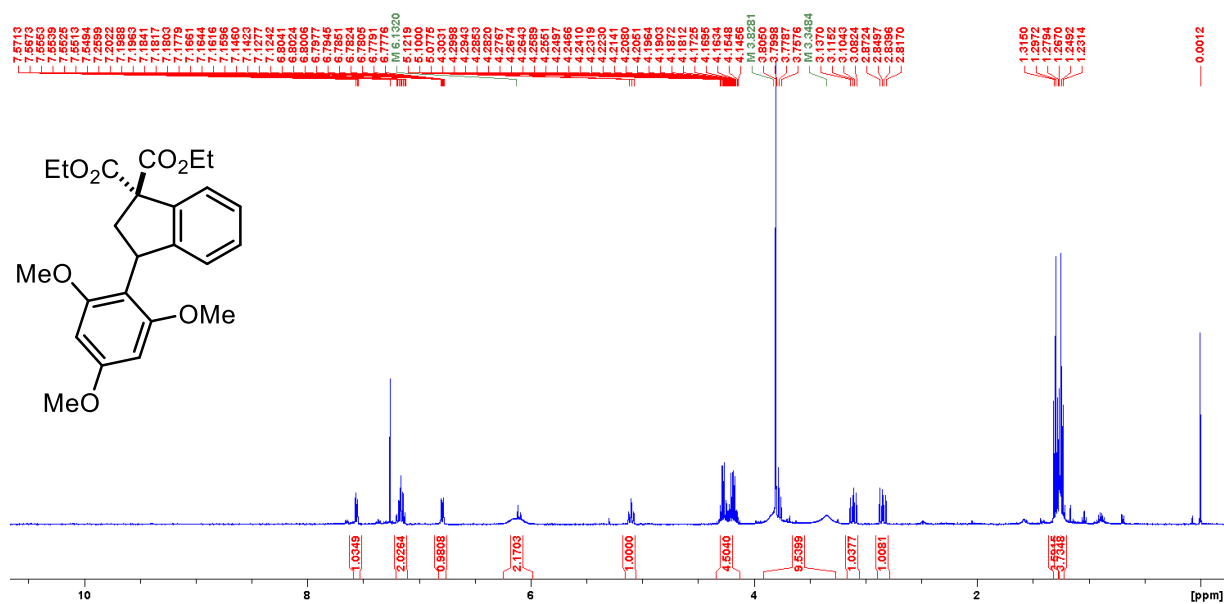

$^{13}\text{C}\{^1\text{H}\}$  NMR (100 MHz,  $\text{CDCl}_3$ )

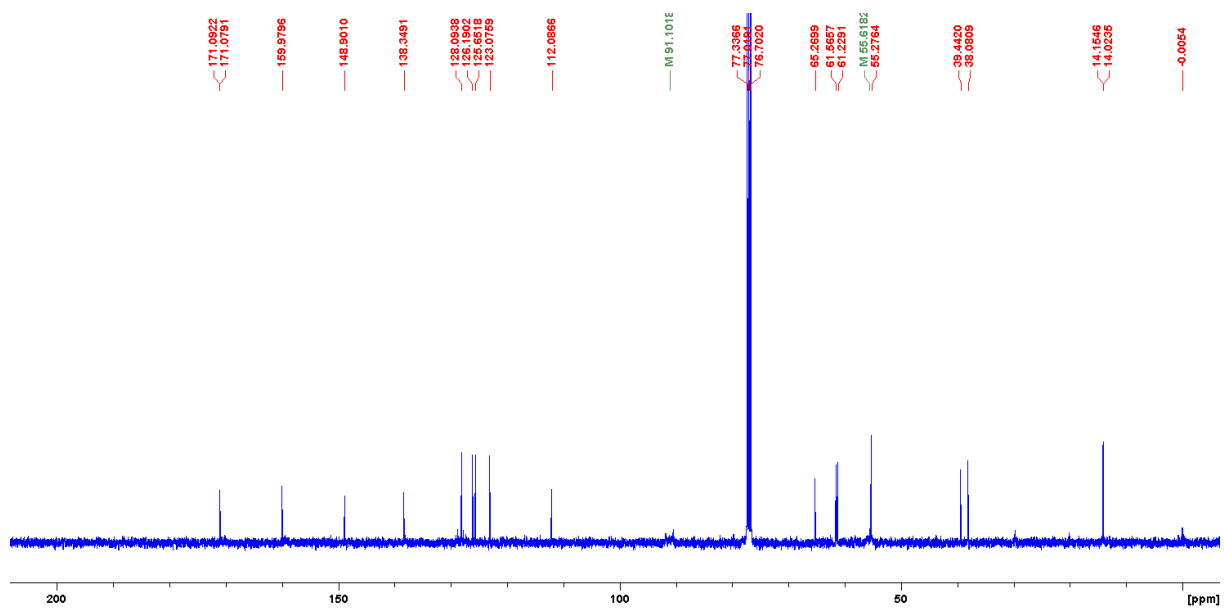

Supplement: Additional file 1 [file 1860-5397-20-15-S1.pdf]
